# Supplementary material for: Dynamics of Streptococcus mutans Transcriptome in Response to Starch and Sucrose during Biofilm Development
Source: PLoS One. 2010 Oct 19;5(10):e13478. doi: 10.1371/journal.pone.0013478 (PMC2957427; doi:10.1371/journal.pone.0013478)
Supplement: Data S1 — The file shows the microarray data output after using BRB-Array-Tools (pre-MDV analysis). (0.33 MB XLS) [file pone.0013478.s002.xls]

## Sheet: 21h - BRB analysis A
	Parametric p-value	FDR	Geometric mean of ratios	Unique id	Description
			(class 0 5%suc + 1% st /class 1% suc )
1	< 1e-07	< 1e-07	5.41887	SMU.83	heat shock protein DnaJ (HSP-40)
2	< 1e-07	< 1e-07	5.20631	SMU.1565	putative 4-alpha-glucanotransferase
3	1e-07	2.78e-05	5.11134	SMU.81	heat shock protein GrpE (HSP-70 cofactor)
4	1e-07	2.78e-05	5.86422	SMU.82	heat shock protein, DnaK (HSP-70)
5	1e-07	2.78e-05	6.53635	SMU.1564	putative glycogen phosphorylase
6	1e-07	2.78e-05	5.58331	SMU.80	transcriptional regulator; repressor (HrcA) of class I heat shock genes
7	1e-07	2.78e-05	5.37385	SMU.1424	putative dihydrolipoamide dehydrogenase
8	3e-07	7.3e-05	3.33529	SMU.1570	putative maltose/maltodextrin ABC transporter, MalG permease
9	7e-07	0.0001362	3.16158	SMU.1571	putative ABC transporter, ATP-binding protein, MsmK-like protein
10	7e-07	0.0001362	2.73341	SMU.141	conserved hypothetical protein
11	1.6e-06	0.0002831	2.48701	SMU.1561	putative potassium uptake system protein TrkB
12	2e-06	0.0003144	2.20995	SMU.1491	PTS system, lactose-specific enzyme IIBC EIIBC-LAC)
13	2.1e-06	0.0003144	0.336351	SMU.1069c	hypothetical protein
14	2.4e-06	0.0003336	3.09161	SMU.1493	tagatose-1,6-bisphosphate aldolase
15	4.8e-06	0.000573	4.48242	SMU.1955	putative co-chaperonin GroES
16	4.9e-06	0.000573	2.12714	SMU.167	hypothetical protein
17	5.2e-06	0.000573	2.85444	SMU.180	putative oxidoreductase; possible fumarate reductase
18	5.3e-06	0.000573	4.05651	SMU.1423	putative pyruvate dehydrogenase, TPP-dependent E1 component alpha-subunit
19	8.9e-06	0.0009115	1.9506	SMU.1563	putative cation-transporting P-type ATPase PacL
20	1.35e-05	0.0013135	0.460391	SMU.2143c	putative tRNA
21	1.6e-05	0.0013946	0.542822	SMU.209c	hypothetical protein
22	1.61e-05	0.0013946	2.80453	SMU.1568	putative maltose/maltodextrin ABC transporter, sugar-binding protein MalX
23	1.67e-05	0.0013946	3.70283	SMU.1954	putative chaperonin GroEL
24	1.72e-05	0.0013946	0.531933	SMU.201c	putative transposon protein
25	1.89e-05	0.0014221	1.89663	SMU.886	galactokinase, GalK
26	1.9e-05	0.0014221	0.553109	SMU.210c	hypothetical protein
27	2.02e-05	0.0014559	0.496613	SMU.200c	hypothetical protein
28	2.14e-05	0.0014873	2.39625	SMU.1889c	hypothetical protein
29	2.74e-05	0.0018183	1.95274	SMU.561c	putative hydrolase (MutT family)
30	2.9e-05	0.0018183	3.48748	SMU.1569	putative maltose/maltodextrin ABC transporter, permease protein MalF
31	2.94e-05	0.0018183	2.0909	SMU.881	sucrose phosphorylase, GtfA
32	2.99e-05	0.0018183	1.75015	SMU.887	galactose-1-P-uridyl transferase, GalT
33	3.53e-05	0.0020816	0.58189	SMU.207c	putative transposon protein
34	3.92e-05	0.0022436	2.96449	SMU.138	putative malate permease
35	4.19e-05	0.0023296	2.75166	SMU.402	pyruvate formate-lyase
36	4.69e-05	0.0025352	1.80566	SMU.616	hypothetical protein
37	4.88e-05	0.0025666	0.37793	SMU.1067c	putative ABC transporter, permease protein
38	5.03e-05	0.0025759	2.02853	SMU.618	hypothetical protein
39	5.22e-05	0.0026046	0.482443	SMU.205c	hypothetical protein
40	5.64e-05	0.0027439	0.576541	SMU.472	conserved hypothetical protein; possible N6-adenine-specific DNA methylase
41	6.22e-05	0.0029522	3.14156	SMU.882	multiple sugar-binding ABC transporter, ATP-binding protein, MsmK
42	6.76e-05	0.0031321	0.625226	SMU.1367c	conserved hypothetical protein
43	7.53e-05	0.0034078	1.6962	SMU.885	galactose operon repressor GalR
44	8.51e-05	0.0037637	1.94116	SMU.880	multiple sugar-binding ABC transporter, permease protein MsmG
45	0.0001034	0.0043681	0.511154	SMU.204c	hypothetical protein
46	0.0001054	0.0043681	0.563743	SMU.213c	hypothetical protein
47	0.0001055	0.0043681	1.72962	SMU.173	putative ppGpp-regulated growth inhibitor
48	0.0001138	0.0046136	1.63037	SMU.1489	conserved hypothetical protein, LacX
49	0.0001219	0.0048412	5.04493	SMU.148	putative alcohol-acetaldehyde dehydrogenase
50	0.0001259	0.0049	1.58596	SMU.2127	putative succinate semialdehyde dehydrogenase
51	0.0001481	0.005651	1.71368	SMU.1073	putative formyl-tetrahydrofolate synthetase
52	0.0001563	0.0058492	1.50844	SMU.125	conserved hypothetical protein
53	0.0001674	0.0061464	1.78701	SMU.877	alpha-galactosidase
54	0.0001943	0.0069702	0.519398	SMU.196c	putative transfer protein
55	0.000197	0.0069702	1.50873	SMU.166	hypothetical protein
56	0.0002283	0.0079137	2.73029	SMU.139	conserved hypothetical protein
57	0.0002318	0.0079137	1.52963	SMU.1521	putative amino acid ABC transporter, permease protein
58	0.0002371	0.0079551	1.49936	SMU.441	putative transcriptional regulator
59	0.0002611	0.0086119	1.54496	SMU.1557c	conserved hypothetical protein
60	0.0002676	0.0086792	1.99798	SMU.2047	putative PTS system, glucose-specific IIABC component
61	0.0002723	0.0086868	0.621179	SMU.1366c	putative ABC transporter; ATP-binding protein
62	0.000311	0.0097614	1.49466	SMU.1090	conserved hypothetical protein
63	0.0003398	0.010496	2.14514	SMU.1490	6-phospho-beta-galactosidase
64	0.0003491	0.0106148	1.50044	SMU.427	putative copper chaperone
65	0.0003736	0.011185	0.66143	SMU.1288	50S ribosomal protein L19
66	0.0003966	0.0116937	0.552209	SMU.211c	hypothetical protein
67	0.0004354	0.0126461	0.542257	SMU.182	putative ABC transporter, ATP-binding protein; possible iron and/or manganese ABC transport system
68	0.0004798	0.0137307	0.599059	SMU.534	putative phosphoribosyl anthranilate transferase
69	0.0004978	0.0140394	0.690277	SMU.1500	putative exonuclease RexB
70	0.0005107	0.0141975	0.693115	SMU.1499	putative exonuclease RexA
71	0.0005379	0.014743	0.648506	SMU.1120	putative sugar ABC transporter, ATP-binding protein
72	0.0005689	0.0153761	0.506517	SMU.2142	putative sugar-phosphate isomerase
73	0.0006455	0.0172074	1.65551	SMU.1562	putative potassium uptake protein TrkA
74	0.0006968	0.018324	1.64507	SMU.896	conserved hypothetical protein
75	0.0007228	0.0187072	0.675652	SMU.473	conserved hypothetical protein
76	0.0007306	0.0187072	0.629157	SMU.2133c	putative membrane protein
77	0.000793	0.0200413	1.53879	SMU.1539	putative 1,4-alpha-glucan branching enzyme
78	0.0009041	0.0225561	0.596181	SMU.195c	hypothetical protein; similar to ORF 5 of bacteriophage SPP1
79	0.0009369	0.023065	0.530186	SMU.1286c	putative permease; multidrug efflux protein
80	0.0009482	0.023065	2.46438	SMU.140	putative glutathione reductase
81	0.000964	0.0231598	0.730447	SMU.475	conserved hypothetical protein

## Sheet: 21h - BRB analysis B
	Parametric p-value	FDR	Geometric mean of ratios	Unique id	Description
			(class 0 5% suc + 1% st /class 0 5%suc)
1	< 1e-07	< 1e-07	0.142072	SMU.140	putative glutathione reductase
2	1e-07	9.73e-05	7.43702	SMU.1564	putative glycogen phosphorylase
3	2e-07	0.0001168	4.93731	SMU.1565	putative 4-alpha-glucanotransferase
4	3e-07	0.0001168	3.80327	SMU.167	hypothetical protein
5	3e-07	0.0001168	0.278408	SMU.137	malolactic enzyme
6	5e-07	0.0001622	0.189393	SMU.138	putative malate permease
7	6e-07	0.0001668	2.66529	SMU.1570	putative maltose/maltodextrin ABC transporter, MalG permease
8	7e-07	0.0001703	0.319573	SMU.1069c	hypothetical protein
9	9e-07	0.0001751	2.76647	SMU.129	putative dihydrolipoamide acetyltransferase
10	9e-07	0.0001751	0.18439	SMU.139	conserved hypothetical protein
11	1.1e-06	0.0001946	0.238425	SMU.141	conserved hypothetical protein
12	2.1e-06	0.0003293	2.51871	SMU.1955	putative co-chaperonin GroES
13	2.2e-06	0.0003293	0.408918	SMU.1878	putative PTS system, mannose-specific component IIC
14	2.5e-06	0.0003406	2.56748	SMU.132	putative hippurate amidohydrolase
15	2.7e-06	0.0003406	2.89927	SMU.128	putative acetoin dehydrogenase (TPP-dependent), E1 component beta subunit
16	2.8e-06	0.0003406	2.28651	SMU.1981c	conserved hypothetical protein
17	4.4e-06	0.0004916	2.26795	SMU.1982c	conserved hypothetical protein
18	4.7e-06	0.0004916	2.87086	SMU.1571	putative ABC transporter, ATP-binding protein, MsmK-like protein
19	4.8e-06	0.0004916	0.389756	SMU.151	hypothetical protein
20	6.1e-06	0.0005935	2.24107	SMU.1985	putative ABC transporter ComYB; probably part of the DNA transport machinery
21	8.6e-06	0.0007446	2.45865	SMU.131	putative lipoate-protein ligase
22	8.7e-06	0.0007446	2.206	SMU.1561	putative potassium uptake system protein TrkB
23	8.8e-06	0.0007446	1.98487	SMU.561c	putative hydrolase (MutT family)
24	9.9e-06	0.0008018	2.10309	SMU.82	heat shock protein, DnaK (HSP-70)
25	1.03e-05	0.0008018	0.502957	SMU.1334	putative phosphopantetheinyl transferase
26	1.27e-05	0.0009505	2.40314	SMU.166	hypothetical protein
27	1.58e-05	0.0011388	0.31536	SMU.1914c	hypothetical protein
28	1.96e-05	0.0013152	0.457951	SMU.958	hypothetical protein
29	1.96e-05	0.0013152	0.504207	SMU.1115	lactate dehydrogenase
30	2.22e-05	0.00144	0.461779	SMU.150	hypothetical protein
31	2.73e-05	0.0017137	0.557382	SMU.1841	putative PTS system, sucrose-specific IIABC component
32	3e-05	0.0018244	0.325091	SMU.1067c	putative ABC transporter, permease protein
33	3.17e-05	0.0018693	1.92508	SMU.952	putative methyltransferase
34	3.51e-05	0.002009	0.293293	SMU.182	putative ABC transporter, ATP-binding protein; possible iron and/or manganese ABC transport system
35	3.94e-05	0.0021201	2.34693	SMU.83	heat shock protein DnaJ (HSP-40)
36	3.94e-05	0.0021201	1.91262	SMU.1073	putative formyl-tetrahydrofolate synthetase
37	4.1e-05	0.0021201	0.570764	SMU.1879	putative PTS system, mannose-specific component IID
38	4.14e-05	0.0021201	3.10209	SMU.1569	putative maltose/maltodextrin ABC transporter, permease protein MalF
39	4.32e-05	0.0021556	1.89678	SMU.80	transcriptional regulator; repressor (HrcA) of class I heat shock genes
40	4.86e-05	0.0023494	0.311182	SMU.184	putative ABC transporter, metal binding lipoprotein; surface adhesin precursor; saliva-binding protein; lipoprotein receptor LraI (LraI family)
41	4.95e-05	0.0023494	2.03967	SMU.1954	putative chaperonin GroEL
42	5.2e-05	0.002385	0.445628	SMU.1905c	putative bacteriocin secretion protein
43	5.27e-05	0.002385	0.470652	SMU.1861c	hypothetical protein
44	5.68e-05	0.0024875	1.9188	SMU.114	putative PTS system, fructose-specific IIBC component
45	5.8e-05	0.0024875	0.572697	SMU.1346	putative thioesterase BacT
46	5.88e-05	0.0024875	1.968	SMU.593	putative ferric uptake regulator protein FurR
47	6.34e-05	0.0026068	1.86855	SMU.81	heat shock protein GrpE (HSP-70 cofactor)
48	6.43e-05	0.0026068	0.485316	SMU.1909c	hypothetical protein
49	7.18e-05	0.0028451	3.34493	SMU.934	putative amino acid ABC transporter, permease protein
50	7.31e-05	0.0028451	0.473258	SMU.1912c	hypothetical protein
51	8.41e-05	0.003209	0.606687	SMU.1344c	putative malonyl-CoA acyl-carrier-protein transacylase
52	9.37e-05	0.0034343	0.613717	SMU.63c	conserved hypothetical protein
53	9.4e-05	0.0034343	0.563819	SMU.1904c	hypothetical protein
54	9.53e-05	0.0034343	1.78089	SMU.1753c	conserved hypothetical protein
55	0.0001005	0.0035559	0.435301	SMU.1913c	putative immunity protein, BLpL-like
56	0.0001033	0.0035897	1.62642	SMU.2127	putative succinate semialdehyde dehydrogenase
57	0.0001059	0.0036155	1.82319	SMU.1987	putative ABC transporter, ATP-binding protein ComYA; late competence gene
58	0.0001152	0.0038557	1.56063	SMU.1555c	conserved hypothetical protein
59	0.0001169	0.0038557	0.460797	SMU.423	hypothetical protein
60	0.0001209	0.0038952	0.61711	SMU.913	putative NADP-specific glutamate dehydrogenase
61	0.0001221	0.0038952	1.72747	SMU.79	fructan hydrolase; exo-beta-D-fructosidase; FruB
62	0.0001563	0.0049058	2.09299	SMU.951	putative amino acid permease
63	0.0001627	0.0050057	1.57053	SMU.1646c	conserved hypothetical protein, possible hemolysis inducing protein
64	0.0001658	0.0050057	0.38439	SMU.183	putative Mn/Zn ABC transporter
65	0.0001672	0.0050057	1.57868	SMU.85	putative phosphomethylpyrimidine kinase
66	0.0001716	0.0050596	2.6159	SMU.962	putative dehydrogenase
67	0.0001766	0.0051293	2.00598	SMU.1563	putative cation-transporting P-type ATPase PacL
68	0.0001835	0.0052208	1.75489	SMU.1558c	putative acetyltransferase
69	0.0001862	0.0052208	1.55379	SMU.947	putative dihydrofolate reductase
70	0.0001878	0.0052208	1.89353	SMU.653c	putative ABC transporter, permease protein
71	0.0001947	0.0053364	1.69242	SMU.421	translation initiation factor 2
72	0.000211	0.0057029	0.576668	SMU.1366c	putative ABC transporter; ATP-binding protein
73	0.0002211	0.0057887	0.549833	SMU.1910c	hypothetical protein
74	0.0002226	0.0057887	0.551573	SMU.1656	putative phosphoserine aminotransferase
75	0.0002231	0.0057887	0.57809	SMU.957	50S ribosomal protein L10
76	0.0002404	0.0061555	1.81576	SMU.1988c	putative DNA binding protein
77	0.0002492	0.006298	0.643968	SMU.1016	putative acetyl-CoA carboxylase, biotin carboxyl carrier subunit
78	0.0002708	0.0067259	0.599398	SMU.1587c	hypothetical protein
79	0.0002756	0.0067259	0.631745	SMU.2038	putative PTS system, trehalose-specific IIABC component
80	0.0002765	0.0067259	2.26098	SMU.115	putative PTS system, fructose-specific IIA component
81	0.0002975	0.0071088	1.61113	SMU.1557c	conserved hypothetical protein
82	0.0002998	0.0071088	1.52677	SMU.1055	putative DNA repair protein RadC
83	0.0003032	0.0071088	0.59748	SMU.1528	FoF1 membrane-bound proton-translocating ATPase, beta subunit
84	0.0003114	0.0072141	1.47688	SMU.418	putative transcription factor NusA
85	0.0003172	0.007262	0.592679	SMU.233	ketol-acid reductoisomerase
86	0.0003267	0.0073501	0.638668	SMU.363	transcriptional regulator; glutamine synthetase repressor
87	0.0003286	0.0073501	2.16614	SMU.961	conserved hypothetical protein
88	0.0003352	0.0074009	0.642049	SMU.1655c	hypothetical protein
89	0.000348	0.0074009	0.586935	SMU.296	conserved hypothetical protein
90	0.0003536	0.0074009	1.55332	SMU.459	putative ABC transporter, amino acid binding protein
91	0.000354	0.0074009	2.30974	SMU.180	putative oxidoreductase; possible fumarate reductase
92	0.0003551	0.0074009	1.49129	SMU.356	purine operon repressor
93	0.0003634	0.0074009	0.567548	SMU.118c	putative esterase
94	0.0003643	0.0074009	1.59205	SMU.880	multiple sugar-binding ABC transporter, permease protein MsmG
95	0.0003648	0.0074009	0.597975	SMU.424	negative transcriptional regulator, CopY
96	0.0003651	0.0074009	0.461344	SMU.1087	putative 4-oxalocrotonate tautomerase
97	0.0003968	0.0079605	1.72546	SMU.1754c	conserved hypothetical protein
98	0.0004021	0.0079846	0.629537	SMU.1080c	conserved hypothetical protein; possible transposon-related protein
99	0.000417	0.0081848	1.77257	SMU.86	conserved hypothetical protein
100	0.0004227	0.0081848	0.453162	SMU.1402c	conserved hypothetical protein
101	0.0004248	0.0081848	1.69689	SMU.402	pyruvate formate-lyase
102	0.0004414	0.0084212	2.26701	SMU.932	hypothetical protein
103	0.0004609	0.008641	1.4612	SMU.490	putative pyruvate formate-lyase activating enzyme
104	0.0004618	0.008641	1.82336	SMU.1763c	conserved hypothetical protein
105	0.00047	0.0087107	0.596869	SMU.154	30S ribosomal protein S15
106	0.000504	0.0090659	2.15608	SMU.576	putative response regulator LytR
107	0.0005041	0.0090659	2.02613	SMU.148	putative alcohol-acetaldehyde dehydrogenase
108	0.0005067	0.0090659	0.506176	SMU.600c	conserved hypothetical protein
109	0.0005078	0.0090659	0.597309	SMU.1296	putative glutathione S-transferase
110	0.0005156	0.0091146	0.651749	SMU.119	putative alcohol dehydrogenase class III
111	0.0005199	0.0091146	0.669797	SMU.1377c	conserved hypothetical protein
112	0.0005269	0.0091549	0.641521	SMU.1602	putative NAD(P)H-flavin oxidoreductase
113	0.0005534	0.0094851	1.55336	SMU.1760c	conserved hypothetical protein
114	0.000557	0.0094851	0.589765	SMU.1338c	putative permease; possible multidrug-efflux transporter
115	0.000564	0.0094851	0.675104	SMU.1100c	putative permease
116	0.0005654	0.0094851	0.292526	SMU.1397c	conserved hypothetical protein
117	0.0005756	0.0095737	0.465024	SMU.1902c	hypothetical protein
118	0.0005867	0.0096756	0.513419	SMU.1531	FoF1 membrane-bound proton-translocating ATPase, delta subunit
119	0.0005968	0.0097594	0.61763	SMU.1078c	putative ABC transporter, ATP-binding protein
120	0.0006187	0.0099183	0.58389	SMU.99	fructose-1,6-biphosphate aldolase
121	0.0006204	0.0099183	0.571299	SMU.242c	putative amino acid ABC transporter, permease protein, glutamine transport system
122	0.0006233	0.0099183	1.5323	SMU.1710c	conserved hypothetical protein
123	0.0006269	0.0099183	1.63868	SMU.482	putative RNA-binding Sun protein; possible rRNA methylase
124	0.0006461	0.0101011	0.413607	SMU.1342	putative bacitracin synthetase 1; BacA
125	0.0006558	0.0101011	1.67008	SMU.127	putative acetoin dehydrogenase (TPP-dependent), E1 component alpha subunit
126	0.0006607	0.0101011	1.4493	SMU.1550c	conserved hypothetical protein; possible integral membrane protein
127	0.000664	0.0101011	1.95331	SMU.626	putative competence protein
128	0.0006659	0.0101011	1.44053	SMU.780	putative chorismate synthase
129	0.0006696	0.0101011	0.692031	SMU.1708	putative potassium uptake system protein TrkA
130	0.0006763	0.0101237	1.45843	SMU.1853	conserved hypothetical protein
131	0.0006965	0.0103465	0.700619	SMU.330	putative glutamyl-tRNA synthetase
132	0.0007052	0.0103964	0.616928	SMU.960	50S ribosomal protein L7/L12
133	0.0007283	0.0106562	0.708736	SMU.596	phosphoglyceromutase
134	0.0007471	0.0108169	0.661024	SMU.445	putative glycyl-tRNA synthetase (alpha subunit)
135	0.0007504	0.0108169	0.702854	SMU.1065c	putative transcriptional regulator (GntR family)
136	0.0007654	0.010952	0.513317	SMU.186	putative metal-dependent transcriptional regulator
137	0.0007776	0.0110453	1.42721	SMU.858	putative aspartate transcarbamoylase
138	0.0007903	0.0111089	1.47935	SMU.21	putative cell shape-determining protein MreD
139	0.0007964	0.0111089	2.09129	SMU.1889c	hypothetical protein
140	0.0007992	0.0111089	0.577864	SMU.1903c	hypothetical protein
141	0.0008057	0.0111198	0.684035	SMU.1573	putative S-adenosylmethionine synthetase
142	0.0008662	0.0118706	1.67895	SMU.1692	pyruvate-formate lyase activating enzyme
143	0.0008953	0.0121836	1.40873	SMU.125	conserved hypothetical protein
144	0.0009116	0.0123193	0.550735	SMU.105	putative transcriptional regulator; repressor of sugar transport operon
145	0.0009264	0.0124329	1.61732	SMU.498	putative late competence protein
146	0.0009677	0.0128982	0.461912	SMU.104	putative alpha-glucosidase; glycosyl hydrolase

## Sheet: 21h - BRB analysis C
	Parametric p-value	FDR	Geometric mean of ratios	Unique id	Description
			(class 0 5% suc /class 1% suc )
1	< 1e-07	< 1e-07	11.4645	SMU.141	conserved hypothetical protein
2	< 1e-07	< 1e-07	13.6135	SMU.139	conserved hypothetical protein
3	< 1e-07	< 1e-07	15.3746	SMU.138	putative malate permease
4	< 1e-07	< 1e-07	4.84498	SMU.1424	putative dihydrolipoamide dehydrogenase
5	4e-07	0.0001557	4.60516	SMU.1423	putative pyruvate dehydrogenase, TPP-dependent E1 component alpha-subunit
6	1.2e-06	0.0003614	7.3978	SMU.137	malolactic enzyme
7	1.3e-06	0.0003614	16.081	SMU.140	putative glutathione reductase
8	5.6e-06	0.0013622	0.40361	SMU.1985	putative ABC transporter ComYB; probably part of the DNA transport machinery
9	1.28e-05	0.0025103	0.48745	SMU.21	putative cell shape-determining protein MreD
10	1.29e-05	0.0025103	2.0785	SMU.1878	putative PTS system, mannose-specific component IIC
11	1.56e-05	0.0027598	2.78839	SMU.82	heat shock protein, DnaK (HSP-70)
12	1.78e-05	0.0028078	2.94358	SMU.80	transcriptional regulator; repressor (HrcA) of class I heat shock genes
13	1.9e-05	0.0028078	2.77439	SMU.1914c	hypothetical protein
14	2.02e-05	0.0028078	0.470023	SMU.593	putative ferric uptake regulator protein FurR
15	2.17e-05	0.0028152	2.73546	SMU.81	heat shock protein GrpE (HSP-70 cofactor)
16	2.7e-05	0.0030731	2.30892	SMU.83	heat shock protein DnaJ (HSP-40)
17	2.81e-05	0.0030731	0.495314	SMU.952	putative methyltransferase
18	3.22e-05	0.0030731	2.25447	SMU.1537	putative glycogen biosynthesis protein GlgD
19	3.23e-05	0.0030731	0.474322	SMU.1981c	conserved hypothetical protein
20	3.26e-05	0.0030731	0.426729	SMU.346	putative NADH dehydrogenase; NAD(P)H nitroreductase
21	3.43e-05	0.0030731	0.472929	SMU.1982c	conserved hypothetical protein
22	3.63e-05	0.0030731	2.16764	SMU.1115	lactate dehydrogenase
23	3.74e-05	0.0030731	1.98988	SMU.616	hypothetical protein
24	3.79e-05	0.0030731	2.07751	SMU.1539	putative 1,4-alpha-glucan branching enzyme
25	5.56e-05	0.0043279	0.45592	SMU.1753c	conserved hypothetical protein
26	6.65e-05	0.0047418	0.483689	SMU.213c	hypothetical protein
27	6.7e-05	0.0047418	0.53694	SMU.1623c	conserved hypothetical protein
28	7.06e-05	0.0047418	2.21102	SMU.150	hypothetical protein
29	7.18e-05	0.0047418	1.73807	SMU.1334	putative phosphopantetheinyl transferase
30	7.31e-05	0.0047418	0.461541	SMU.626	putative competence protein
31	8.49e-05	0.0053295	2.76178	SMU.1902c	hypothetical protein
32	9.58e-05	0.0057378	1.71881	SMU.1491	PTS system, lactose-specific enzyme IIBC EIIBC-LAC)
33	9.73e-05	0.0057378	2.30307	SMU.1493	tagatose-1,6-bisphosphate aldolase
34	0.0001034	0.0058148	0.462588	SMU.1763c	conserved hypothetical protein
35	0.0001093	0.0058148	0.582662	SMU.344	hypothetical protein
36	0.0001116	0.0058148	0.509276	SMU.951	putative amino acid permease
37	0.0001177	0.0058148	1.97415	SMU.1602	putative NAD(P)H-flavin oxidoreductase
38	0.000118	0.0058148	0.497553	SMU.1610	50S ribosomal protein L33
39	0.0001205	0.0058148	0.574376	SMU.2083c	hypothetical protein
40	0.0001208	0.0058148	1.73153	SMU.913	putative NADP-specific glutamate dehydrogenase
41	0.0001229	0.0058148	0.568854	SMU.923	putative ABC transporter, ATP-binding protein
42	0.0001255	0.0058148	1.80241	SMU.1520	putative ABC transporter, glutamine binding protein
43	0.0001418	0.0064173	0.559292	SMU.167	hypothetical protein
44	0.0001739	0.0076911	1.8078	SMU.1656	putative phosphoserine aminotransferase
45	0.0001799	0.0077628	0.583361	SMU.210c	hypothetical protein
46	0.0001835	0.0077628	0.520658	SMU.1988c	putative DNA binding protein
47	0.0001967	0.0081442	3.72481	SMU.1397c	conserved hypothetical protein
48	0.000207	0.0083921	1.72402	SMU.1655c	hypothetical protein
49	0.0002214	0.0086223	1.83698	SMU.864	putative ABC transporter, permease component
50	0.0002285	0.0086223	1.58395	SMU.255	putative oligopeptide ABC transporter, substrate-binding protein OppA
51	0.0002293	0.0086223	0.440981	SMU.350	tRNA-Leu
52	0.0002304	0.0086223	0.51496	SMU.349	dimethyladenosine transferase
53	0.0002707	0.0096292	0.493329	SMU.1554c	hypothetical protein
54	0.0002737	0.0096292	1.57852	SMU.1924	response regulator GcrR for glucan-binding protein C
55	0.0002743	0.0096292	2.67671	SMU.149	putative transposase
56	0.0002771	0.0096292	2.84878	SMU.148	putative alcohol-acetaldehyde dehydrogenase
57	0.0002915	0.0099519	0.539351	SMU.200c	hypothetical protein
58	0.0003097	0.010391	1.90452	SMU.600c	conserved hypothetical protein
59	0.0003281	0.0107484	0.600627	SMU.209c	hypothetical protein
60	0.0003314	0.0107484	0.600537	SMU.1764c	conserved hypothetical protein
61	0.0003479	0.0107608	1.82917	SMU.427	putative copper chaperone
62	0.0003529	0.0107608	1.56705	SMU.1247	putative enolase
63	0.0003534	0.0107608	0.62376	SMU.1550c	conserved hypothetical protein; possible integral membrane protein
64	0.0003539	0.0107608	2.10964	SMU.618	hypothetical protein
65	0.000368	0.0110174	1.92885	SMU.186	putative metal-dependent transcriptional regulator
66	0.0004205	0.01236	1.60674	SMU.360	extracellular glyceraldehyde-3-phosphate dehydrogenase
67	0.000428	0.01236	0.634767	SMU.940c	putative hemolysin III
68	0.0004319	0.01236	0.650795	SMU.1611c	putative permease; possible multi-drug resistance efflux pump
69	0.0004516	0.0127364	0.6343	SMU.421	translation initiation factor 2
70	0.000472	0.0130869	1.60065	SMU.363	transcriptional regulator; glutamine synthetase repressor
71	0.0004815	0.0130869	0.645164	SMU.1926	putative transcriptional regulator
72	0.0004842	0.0130869	2.27164	SMU.105	putative transcriptional regulator; repressor of sugar transport operon
73	0.0004958	0.0132168	1.52165	SMU.63c	conserved hypothetical protein
74	0.0005066	0.0133222	0.558242	SMU.109	conserved hypothetical protein; possible permease (efflux protein)
75	0.0005214	0.0135286	0.530683	SMU.1987	putative ABC transporter, ATP-binding protein ComYA; late competence gene
76	0.0005461	0.013983	0.629173	SMU.2158c	putative tryptophanyl-tRNA synthetase
77	0.0006508	0.0159596	1.60088	SMU.2038	putative PTS system, trehalose-specific IIABC component
78	0.000652	0.0159596	0.641298	SMU.1609c	putative membrane protein involved in protein secretion, SecG
79	0.0006543	0.0159596	0.534487	SMU.1754c	conserved hypothetical protein
80	0.0006561	0.0159596	1.72467	SMU.1536	putative starch (bacterial glycogen) synthase
81	0.000666	0.0160004	1.48681	SMU.1489	conserved hypothetical protein, LacX
82	0.0006869	0.0161564	0.560299	SMU.97	tRNA-Leu
83	0.000691	0.0161564	0.434448	SMU.1410	putative reductase
84	0.0007037	0.0161564	1.84886	SMU.182	putative ABC transporter, ATP-binding protein; possible iron and/or manganese ABC transport system
85	0.0007057	0.0161564	1.53275	SMU.1344c	putative malonyl-CoA acyl-carrier-protein transacylase
86	0.0007335	0.0165976	0.584195	SMU.472	conserved hypothetical protein; possible N6-adenine-specific DNA methylase
87	0.0007536	0.0168564	2.18209	SMU.1568	putative maltose/maltodextrin ABC transporter, sugar-binding protein MalX
88	0.0007629	0.0168705	0.609386	SMU.480	primosomal replication factor Y (primosomal protein N')
89	0.0007725	0.0168908	2.40062	SMU.1490	6-phospho-beta-galactosidase
90	0.0007822	0.0169129	0.669019	SMU.490	putative pyruvate formate-lyase activating enzyme
91	0.0007966	0.017035	0.658783	SMU.1196c	conserved hypothetical protein
92	0.0008233	0.0174146	0.482246	SMU.422	ribosome binding factor A
93	0.0008454	0.0176898	0.539531	SMU.196c	putative transfer protein
94	0.0008603	0.0177823	1.47813	SMU.277	hypothetical protein
95	0.0008681	0.0177823	0.685901	SMU.1713c	conserved hypothetical protein
96	0.0008861	0.017962	0.626111	SMU.201c	putative transposon protein
97	0.0008959	0.0179734	1.68743	SMU.1531	FoF1 membrane-bound proton-translocating ATPase, delta subunit
98	0.0009185	0.0182388	1.7127	SMU.1522	putative amino acid ABC transporter, integral membrane protein
99	0.0009433	0.0183097	1.63224	SMU.914c	conserved hypothetical protein
100	0.0009496	0.0183097	0.661187	SMU.2143c	putative tRNA
101	0.0009503	0.0183097	1.62197	SMU.911c	hypothetical protein
102	0.0009781	0.0186482	1.78755	SMU.1912c	hypothetical protein
103	0.0009872	0.0186482	0.653395	SMU.343	hypothetical protein

## Sheet: 24h - BRB analysis A
	Parametric p-value	FDR	Geometric mean of ratios	Unique id	Description
			(class 0 5%suc + 1%st /class 1%suc )
1	0.0001169	0.13189	0.834875	SMU.2060	putative transcriptional regulator (LysR family)
2	0.0002095	0.13189	0.845097	SMU.247	putative ABC transporter, ATP-binding protein
3	0.0002338	0.13189	0.672048	SMU.131	putative lipoate-protein ligase
4	0.0002711	0.13189	0.711047	SMU.992	hypothetical protein
5	0.0006755	0.204046	0.502552	SMU.1069c	hypothetical protein
6	0.0007204	0.204046	0.689699	SMU.994	putative ribonuclease HII
7	0.0007577	0.204046	0.743847	SMU.1437	putative UDP-N-acetylglucosamine 2-epimerase
8	0.0009233	0.204046	0.821621	SMU.1073	putative formyl-tetrahydrofolate synthetase
9	0.0010602	0.204046	1.07761	SMU.560c	conserved hypothetical protein
10	0.0011757	0.204046	1.15364	SMU.1822	putative aspartyl-tRNA synthetase
11	0.0012934	0.204046	0.416645	SMU.1067c	putative ABC transporter, permease protein
12	0.0013258	0.204046	0.425463	SMU.1068c	putative ABC transporter, ATP-binding protein
13	0.0013631	0.204046	0.658996	SMU.128	putative acetoin dehydrogenase (TPP-dependent), E1 component beta subunit
14	0.0019301	0.268284	0.927824	SMU.2097	hypothetical protein
15	0.0021825	0.283143	0.726401	SMU.127	putative acetoin dehydrogenase (TPP-dependent), E1 component alpha subunit
16	0.0027119	0.314691	0.792423	SMU.1645	putative tellurite resistance protein
17	0.0027491	0.314691	0.895302	SMU.1849	putative deoxycytidylate deaminase
18	0.0030817	0.333166	2.12173	SMU.1564	putative glycogen phosphorylase
19	0.0034082	0.334425	0.798913	SMU.87	conserved hypothetical protein
20	0.0038436	0.334425	0.698599	SMU.1013c	putative Mg2+/citrate transporter
21	0.0038716	0.334425	1.12489	SMU.63c	conserved hypothetical protein
22	0.0040648	0.334425	0.912385	SMU.1850	putative aminopeptidase P
23	0.004289	0.334425	1.82383	SMU.2038	putative PTS system, trehalose-specific IIABC component
24	0.0044228	0.334425	0.754226	SMU.951	putative amino acid permease
25	0.0044463	0.334425	0.720259	SMU.295	hypothetical protein
26	0.0047956	0.334425	0.867534	SMU.1912c	hypothetical protein
27	0.0048592	0.334425	0.669496	SMU.1917	putative response regulator of the competence regulon, ComE; response regulator of sakacin A production
28	0.0052151	0.334425	0.882166	SMU.1649	putative exodeoxyribonuclease III
29	0.0054371	0.334425	0.786371	SMU.1788c	putative bacterocin transport accessory protein, Bta
30	0.0058869	0.334425	0.773596	SMU.927	putative response regulator
31	0.0059084	0.334425	0.864873	SMU.1926	putative transcriptional regulator
32	0.0059277	0.334425	0.752122	SMU.998	putative ABC transporter, periplasmic ferrichrome-binding protein
33	0.0064313	0.334425	1.21352	SMU.412c	putative Hit-like protein involved in cell-cycle regulation
34	0.0064806	0.334425	1.40494	SMU.2037	putative trehalose-6-phosphate hydrolase TreA
35	0.0065803	0.334425	0.710425	SMU.129	putative dihydrolipoamide acetyltransferase
36	0.0067253	0.334425	1.37923	SMU.104	putative alpha-glucosidase; glycosyl hydrolase
37	0.0067327	0.334425	1.48146	SMU.459	putative ABC transporter, amino acid binding protein
38	0.0067416	0.334425	1.98641	SMU.1571	putative ABC transporter, ATP-binding protein, MsmK-like protein
39	0.0068778	0.334425	1.14232	SMU.1574c	conserved hypothetical protein
40	0.0069215	0.334425	0.828928	SMU.1714c	hypothetical protein
41	0.0070727	0.334425	1.29698	SMU.1936c	conserved hypothetical protein
42	0.0072955	0.334425	0.742475	SMU.1452	alpha-acetolactate synthase
43	0.0073956	0.334425	0.630732	SMU.924	thiol peroxidase
44	0.0075615	0.334425	1.99808	SMU.1570	putative maltose/maltodextrin ABC transporter, MalG permease
45	0.0078544	0.339659	1.07119	SMU.891	type I restriction-modification system DNA methylase
46	0.0082287	0.343562	0.742786	SMU.1331c	putative transposase
47	0.0083057	0.343562	0.675064	SMU.993	putative GTP-binding protein
48	0.0084743	0.343562	0.408052	SMU.940c	putative hemolysin III
49	0.0088236	0.350423	0.816876	SMU.1867c	putative alcohol dehydrogenase
50	0.0091505	0.356137	2.18842	SMU.625	putative competence protein
51	0.0096703	0.368988	0.904374	SMU.2126c	putative purine-nucleoside phosphorylase

## Sheet: 24h - BRB analysis B
	Parametric p-value	FDR	Geometric mean of ratios	Unique id	Description
			(class 0 5%suc+ 1%st /class 0 5%suc )
1	1.24e-05	0.0241304	2.10059	SMU.202c	hypothetical protein
2	0.0002652	0.221406	1.92294	SMU.209c	hypothetical protein
3	0.0004442	0.221406	1.98948	SMU.210c	hypothetical protein
4	0.0005583	0.221406	2.22668	SMU.213c	hypothetical protein
5	0.000579	0.221406	2.29513	SMU.196c	putative transfer protein
6	0.0007546	0.221406	1.96613	SMU.201c	putative transposon protein
7	0.0008747	0.221406	1.78437	SMU.207c	putative transposon protein
8	0.0009102	0.221406	0.747827	SMU.1009	putative histidine kinase
9	0.0013753	0.258447	0.432224	SMU.1068c	putative ABC transporter, ATP-binding protein
10	0.0014062	0.258447	2.26599	SMU.1754c	conserved hypothetical protein
11	0.0014609	0.258447	2.51054	SMU.1757c	conserved hypothetical protein
12	0.002324	0.366109	0.636774	SMU.998	putative ABC transporter, periplasmic ferrichrome-binding protein
13	0.0027313	0.366109	1.67307	SMU.673	conserved hypothetical protein
14	0.003176	0.366109	0.841143	SMU.1744	putative 3-oxoacyl-[acyl-carrier-protein] synthase III
15	0.0032713	0.366109	1.78079	SMU.962	putative dehydrogenase
16	0.003361	0.366109	1.13631	SMU.1660c	conserved hypothetical protein
17	0.0035048	0.366109	0.820183	SMU.1125c	conserved hypothetical protein
18	0.0038902	0.366109	2.35056	SMU.200c	hypothetical protein
19	0.0040251	0.366109	0.887629	SMU.776	conserved hypothetical protein
20	0.0041616	0.366109	1.92907	SMU.671	citrate synthase
21	0.0043677	0.366109	1.4079	SMU.1926	putative transcriptional regulator
22	0.0044231	0.366109	0.654459	SMU.1650	putative endonuclease III (DNA repair)
23	0.0046385	0.366109	0.775203	SMU.1653	putative D-3-phosphoglycerate dehydrogenase
24	0.0047642	0.366109	1.22806	SMU.2143c	putative tRNA
25	0.0049526	0.366109	0.473104	SMU.100	putative sorbose PTS system, IIB component
26	0.0052077	0.366109	2.50172	SMU.1753c	conserved hypothetical protein
27	0.0053591	0.366109	1.06787	SMU.548	putative D-glutamic acid adding enzyme MurD; UDP-N-acetylmuramoylalanine--D-glutamate ligase
28	0.0054746	0.366109	1.17121	SMU.36	conserved hypothetical protein
29	0.0057902	0.366109	2.15205	SMU.1755c	conserved hypothetical protein
30	0.0058459	0.366109	1.12294	SMU.304	putative deaminase
31	0.0059133	0.366109	1.34792	SMU.625	putative competence protein
32	0.0060203	0.366109	0.646006	SMU.606	hypothetical protein
33	0.0064052	0.373571	0.813365	SMU.659	putative response regulator SpaR
34	0.0065835	0.373571	1.14706	SMU.1572	putative UDP-N-acetylglucosamine-1-carboxyvinyl transferase
35	0.0069456	0.373571	1.30811	SMU.187c	conserved hypothetical protein
36	0.006999	0.373571	1.07776	SMU.1840	putative fructokinase
37	0.0071149	0.373571	0.856973	SMU.1511c	putative acetyltransferase
38	0.0072948	0.373571	2.38167	SMU.211c	hypothetical protein
39	0.0075148	0.374969	2.79508	SMU.1761c	conserved hypothetical protein
40	0.0079487	0.380471	0.541487	SMU.186	putative metal-dependent transcriptional regulator
41	0.0081819	0.380471	0.800961	SMU.336	putative ribonuclease P protein component
42	0.0082116	0.380471	0.627641	SMU.1069c	hypothetical protein
43	0.0086526	0.383013	0.808437	SMU.735	hypothetical protein
44	0.0086601	0.383013	0.610281	SMU.1161c	hypothetical protein
45	0.0089192	0.385682	0.70163	SMU.2055	putative acetyltransferase
46	0.0096467	0.385682	0.762708	SMU.1912c	hypothetical protein
47	0.00966	0.385682	2.30063	SMU.1760c	conserved hypothetical protein
48	0.0099057	0.385682	1.4333	SMU.2149c	putative ABC transporter, ATP-binding protein; possible cobalt transport system

## Sheet: 24h - BRB analysis C
	Parametric p-value	FDR	Geometric mean of ratios	Unique id	Description
			(class 0 5% suc /class 1% suc )
1	0.0001139	0.159655	0.793386	SMU.634	putative S-adenosylmethionine--tRNA ribosyltransferase-isomerase
2	0.0002493	0.159655	0.850132	SMU.1849	putative deoxycytidylate deaminase
3	0.0003676	0.159655	0.546314	SMU.673	conserved hypothetical protein
4	0.0004834	0.159655	0.614298	SMU.1926	putative transcriptional regulator
5	0.0005358	0.159655	1.16892	SMU.607	conserved hypothetical protein
6	0.0005436	0.159655	1.26936	SMU.598	putative recombination protein RecM
7	0.0005743	0.159655	0.831092	SMU.344	hypothetical protein
8	0.0007573	0.1661	0.515608	SMU.2109	putative MDR permease; possible multidrug efflux pump
9	0.0008082	0.1661	0.762093	SMU.990	putative dihydrodipicolinate synthase
10	0.0008942	0.1661	0.6758	SMU.18	tRNA-Ser
11	0.0009389	0.1661	1.74148	SMU.141	conserved hypothetical protein
12	0.0011643	0.181951	0.834152	SMU.1870	putative DNA mismatch repair protein MutS2
13	0.0013698	0.181951	0.458473	SMU.210c	hypothetical protein
14	0.0015225	0.181951	1.54031	SMU.1644c	hypothetical protein
15	0.0015959	0.181951	1.19842	SMU.996	putative ABC transporter, permease protein; possible ferrichrome transport system
16	0.0016165	0.181951	0.747254	SMU.2033c	tRNA-Cys
17	0.0016314	0.181951	1.44016	SMU.1539	putative 1,4-alpha-glucan branching enzyme
18	0.001683	0.181951	0.703055	SMU.16	putative amino acid permease
19	0.002113	0.202208	0.747551	SMU.1710c	conserved hypothetical protein
20	0.0021187	0.202208	1.86319	SMU.105	putative transcriptional regulator; repressor of sugar transport operon
21	0.0021821	0.202208	1.07899	SMU.1278c	conserved hypothetical protein
22	0.0026463	0.222848	0.406755	SMU.213c	hypothetical protein
23	0.0027435	0.222848	0.3911	SMU.672	isocitrate dehydrogenase
24	0.0027642	0.222848	2.33908	SMU.803c	putative ABC transporter, ATP-binding protein
25	0.0028629	0.222848	0.49517	SMU.209c	hypothetical protein
26	0.0036026	0.252646	0.40861	SMU.196c	putative transfer protein
27	0.003906	0.252646	0.680657	SMU.1795c	conserved hypothetical protein
28	0.0039852	0.252646	0.749476	SMU.992	hypothetical protein
29	0.0043164	0.252646	0.720382	SMU.418	putative transcription factor NusA
30	0.00436	0.252646	1.33905	SMU.1803c	hypothetical protein
31	0.0043724	0.252646	0.756083	SMU.187c	conserved hypothetical protein
32	0.0048574	0.252646	0.338966	SMU.1757c	conserved hypothetical protein
33	0.0050251	0.252646	1.48989	SMU.1367c	conserved hypothetical protein
34	0.0051264	0.252646	0.533909	SMU.671	citrate synthase
35	0.0051559	0.252646	0.444418	SMU.2147c	conserved hypothetical protein
36	0.0051902	0.252646	0.799896	SMU.1949	putative membrane carboxypeptidase, penicillin-binding protein 2a
37	0.0054563	0.252646	0.365976	SMU.1754c	conserved hypothetical protein
38	0.0054694	0.252646	1.39383	SMU.898	conserved hypothetical protein
39	0.0054867	0.252646	0.451728	SMU.208c	putative transposon protein; possible DNA segregation ATPase
40	0.0055698	0.252646	0.380807	SMU.1755c	conserved hypothetical protein
41	0.0056327	0.252646	0.752817	SMU.948	conserved hypothetical protein
42	0.0057083	0.252646	1.16904	SMU.1065c	putative transcriptional regulator (GntR family)
43	0.0057895	0.252646	0.841813	SMU.1062	putative ABC transporter, proline/glycine betaine permease protein
44	0.0064076	0.252646	1.09897	SMU.1418	putative coproporphyrinogen III oxidase
45	0.0064926	0.252646	0.736027	SMU.178	conserved hypothetical protein
46	0.0066394	0.252646	1.10383	SMU.1215	putative uracil DNA glycosylase
47	0.0068543	0.252646	0.559793	SMU.207c	putative transposon protein
48	0.006875	0.252646	0.707859	SMU.2117	putative osmoprotectant ABC transporter; permease protein
49	0.0069273	0.252646	0.73065	SMU.1523	putative membrane nuclease EndA
50	0.0070063	0.252646	0.526138	SMU.200c	hypothetical protein
51	0.0073213	0.252646	0.50045	SMU.201c	putative transposon protein
52	0.0073495	0.252646	0.799311	SMU.2137c	conserved hypothetical protein
53	0.0074005	0.252646	1.14451	SMU.806c	putative glutamine ABC transporter, permease protein
54	0.0074806	0.252646	0.57989	SMU.2149c	putative ABC transporter, ATP-binding protein; possible cobalt transport system
55	0.0075353	0.252646	1.49112	SMU.1360c	hypothetical protein
56	0.007586	0.252646	1.16424	SMU.227c	conserved hypothetical protein
57	0.0077018	0.252646	0.788314	SMU.188c	putative 33 kD chaperonin (heat shock protein 33) (HSP-33)
58	0.0077743	0.252646	0.70116	SMU.2083c	hypothetical protein
59	0.0078117	0.252646	0.840082	SMU.1970c	putative phenylalanyl-tRNA synthetase, beta subunit
60	0.008022	0.252646	0.651568	SMU.962	putative dehydrogenase
61	0.0080338	0.252646	1.30361	SMU.445	putative glycyl-tRNA synthetase (alpha subunit)
62	0.0081362	0.252646	2.94113	SMU.100	putative sorbose PTS system, IIB component
63	0.0082224	0.252646	0.400504	SMU.211c	hypothetical protein
64	0.008309	0.252646	1.27572	SMU.1511c	putative acetyltransferase
65	0.0085586	0.256231	0.322301	SMU.1761c	conserved hypothetical protein
66	0.0088491	0.258461	2.08928	SMU.186	putative metal-dependent transcriptional regulator
67	0.0088987	0.258461	1.19078	SMU.1043c	putative phosphotransacetylase
68	0.0091012	0.260455	0.82057	SMU.2017	50S ribosomal protein L14
69	0.0093674	0.26301	2.00287	SMU.140	putative glutathione reductase
70	0.0096337	0.26301	0.708149	SMU.667	putative ribonucleotide reductase, small subunit
71	0.0099186	0.26301	0.753797	SMU.994	putative ribonuclease HII
72	0.0099237	0.26301	0.894338	SMU.1302	putative surface adhesin; AdcA protein homolog; putative Zn-binding lipoprotein
73	0.0099721	0.26301	0.818431	SMU.1740	putative 3-oxoacyl-acyl-carrier-protein reductase / 3-ketoacyl-acyl carrier protein reductase

## Sheet: 30h - BRB analysis A
	Parametric p-value	FDR	Geometric mean of ratios	Unique id	Description
			(class 0 5% suc + 1% st /class 1% suc )
1	< 1e-07	< 1e-07	63.0634	SMU.2038	putative PTS system, trehalose-specific IIABC component
2	< 1e-07	< 1e-07	38.8387	SMU.1564	putative glycogen phosphorylase
3	< 1e-07	< 1e-07	22.3136	SMU.1568	putative maltose/maltodextrin ABC transporter, sugar-binding protein MalX
4	< 1e-07	< 1e-07	19.4739	SMU.1570	putative maltose/maltodextrin ABC transporter, MalG permease
5	< 1e-07	< 1e-07	29.658	SMU.1565	putative 4-alpha-glucanotransferase
6	< 1e-07	< 1e-07	17.896	SMU.105	putative transcriptional regulator; repressor of sugar transport operon
7	< 1e-07	< 1e-07	11.2254	SMU.1535	glycogen phosphorylase
8	< 1e-07	< 1e-07	50.5986	SMU.2037	putative trehalose-6-phosphate hydrolase TreA
9	< 1e-07	< 1e-07	8.53293	SMU.882	multiple sugar-binding ABC transporter, ATP-binding protein, MsmK
10	< 1e-07	< 1e-07	13.0346	SMU.1537	putative glycogen biosynthesis protein GlgD
11	< 1e-07	< 1e-07	26.0885	SMU.1571	putative ABC transporter, ATP-binding protein, MsmK-like protein
12	< 1e-07	< 1e-07	10.2535	SMU.2127	putative succinate semialdehyde dehydrogenase
13	< 1e-07	< 1e-07	18.1385	SMU.1569	putative maltose/maltodextrin ABC transporter, permease protein MalF
14	< 1e-07	< 1e-07	7.17217	SMU.883	dextran glucosidase DexB
15	< 1e-07	< 1e-07	14.4561	SMU.100	putative sorbose PTS system, IIB component
16	< 1e-07	< 1e-07	17.3905	SMU.1539	putative 1,4-alpha-glucan branching enzyme
17	< 1e-07	< 1e-07	15.7621	SMU.103	putative PTS system, IIA component
18	< 1e-07	< 1e-07	12.2511	SMU.102	putative PTS system, IID component
19	< 1e-07	< 1e-07	6.01033	SMU.880	multiple sugar-binding ABC transporter, permease protein MsmG
20	< 1e-07	< 1e-07	7.27184	SMU.871	putative fructose-1-phosphate kinase
21	< 1e-07	< 1e-07	14.3003	SMU.1861c	hypothetical protein
22	< 1e-07	< 1e-07	5.65766	SMU.402	pyruvate formate-lyase
23	< 1e-07	< 1e-07	20.7734	SMU.1538	putative glucose-1-phosphate adenylyltransferase; ADP-glucose pyrophosphorylase
24	< 1e-07	< 1e-07	16.8379	SMU.101	putative sorbose PTS system, IIC component
25	< 1e-07	< 1e-07	11.2627	SMU.180	putative oxidoreductase; possible fumarate reductase
26	< 1e-07	< 1e-07	17.7193	SMU.104	putative alpha-glucosidase; glycosyl hydrolase
27	< 1e-07	< 1e-07	5.56196	SMU.879	multiple sugar-binding ABC transporter, permease protein MsmF
28	< 1e-07	< 1e-07	18.0687	SMU.2046c	conserved hypothetical protein
29	< 1e-07	< 1e-07	9.6216	SMU.872	putative PTS system, fructose-specific enzyme IIABC component
30	< 1e-07	< 1e-07	5.92104	SMU.1877	putative PTS system, mannose-specific component IIAB
31	< 1e-07	< 1e-07	4.69404	SMU.1090	conserved hypothetical protein
32	< 1e-07	< 1e-07	5.6124	SMU.878	multiple sugar-binding ABC transporter, sugar-binding protein precursor MsmE
33	< 1e-07	< 1e-07	9.36094	SMU.1536	putative starch (bacterial glycogen) synthase
34	< 1e-07	< 1e-07	5.41123	SMU.881	sucrose phosphorylase, GtfA
35	< 1e-07	< 1e-07	23.7978	SMU.2047	putative PTS system, glucose-specific IIABC component
36	< 1e-07	< 1e-07	8.8094	SMU.1879	putative PTS system, mannose-specific component IID
37	< 1e-07	< 1e-07	4.39632	SMU.1088	putative thiamine biosynthesis lipoprotein
38	< 1e-07	< 1e-07	4.53254	SMU.870	putative transcriptional regulator of sugar metabolism
39	< 1e-07	< 1e-07	4.19669	SMU.1089	conserved hypothetical protein
40	< 1e-07	< 1e-07	4.41689	SMU.148	putative alcohol-acetaldehyde dehydrogenase
41	< 1e-07	< 1e-07	4.89682	SMU.1077	putative phosphoglucomutase
42	< 1e-07	< 1e-07	6.34501	SMU.179	conserved hypothetical protein
43	< 1e-07	< 1e-07	5.19093	SMU.577	putative histidine kinase LytS
44	< 1e-07	< 1e-07	4.78371	SMU.1878	putative PTS system, mannose-specific component IIC
45	< 1e-07	< 1e-07	29.1665	SMU.1423	putative pyruvate dehydrogenase, TPP-dependent E1 component alpha-subunit
46	< 1e-07	< 1e-07	5.61001	SMU.149	putative transposase
47	< 1e-07	< 1e-07	0.300209	SMU.1658	putative ammonium transporter, NrgA protein
48	< 1e-07	< 1e-07	3.87822	SMU.252	hypothetical protein
49	< 1e-07	< 1e-07	0.299855	SMU.1700c	conserved hypothetical protein; possible LrgB family protein
50	< 1e-07	< 1e-07	3.8589	SMU.1491	PTS system, lactose-specific enzyme IIBC EIIBC-LAC)
51	1e-07	3.5e-06	2.78731	SMU.1013c	putative Mg2+/citrate transporter
52	1e-07	3.5e-06	0.260809	SMU.1701c	conserved hypothetical protein
53	1e-07	3.5e-06	2.46212	SMU.887	galactose-1-P-uridyl transferase, GalT
54	1e-07	3.5e-06	4.14263	SMU.1490	6-phospho-beta-galactosidase
55	1e-07	3.5e-06	0.378589	SMU.1098c	putative oxidoreductase
56	2e-07	6.6e-06	3.2072	SMU.2057c	putative cadmium-transporting ATPase; P-type ATPase
57	2e-07	6.6e-06	0.397971	SMU.1699c	conserved hypothetical protein
58	2e-07	6.6e-06	2.35946	SMU.886	galactokinase, GalK
59	2e-07	6.6e-06	13.4213	SMU.1596	putative PTS system, cellobiose-specific IIC component
60	3e-07	9.4e-06	4.212	SMU.1338c	putative permease; possible multidrug-efflux transporter
61	3e-07	9.4e-06	2.84934	SMU.1862	hypothetical protein
62	3e-07	9.4e-06	3.53625	SMU.1494	tagatose-6-phosphate kinase
63	4e-07	1.22e-05	0.381624	SMU.1697c	conserved hypothetical protein
64	4e-07	1.22e-05	3.57888	SMU.980	putative PTS system, beta-glucoside-specific EII component
65	5e-07	1.47e-05	4.26699	SMU.877	alpha-galactosidase
66	5e-07	1.47e-05	8.74393	SMU.576	putative response regulator LytR
67	6e-07	1.69e-05	2.21642	SMU.1153c	hypothetical protein
68	6e-07	1.69e-05	2.42304	SMU.494	putative transaldolase
69	6e-07	1.69e-05	3.25599	SMU.45	hypothetical protein
70	8e-07	2.16e-05	3.51052	SMU.1155	hypothetical protein
71	8e-07	2.16e-05	2.82307	SMU.1495	galactose-6-phosphate isomerase, subunit LacB
72	8e-07	2.16e-05	2.72695	SMU.1770	putative valyl-tRNA synthetase
73	9e-07	2.37e-05	3.34653	SMU.1043c	putative phosphotransacetylase
74	9e-07	2.37e-05	2.25018	SMU.1574c	conserved hypothetical protein
75	1e-06	2.56e-05	2.34678	SMU.1184c	putative transcriptional regulator, antiterminator
76	1e-06	2.56e-05	2.92731	SMU.1185	PTS system, mannitol-specific enzyme IIBC component
77	1.1e-06	2.68e-05	0.498893	SMU.629	putative manganese-type superoxide dismutase, Fe/Mn-SOD
78	1.1e-06	2.68e-05	4.59331	SMU.874	conserved hypothetical protein; putative reductase
79	1.1e-06	2.68e-05	0.482708	SMU.924	thiol peroxidase
80	1.1e-06	2.68e-05	2.47645	SMU.1409c	putative transcriptional regulator
81	1.2e-06	2.85e-05	2.19501	SMU.1590	intracellular alpha-amylase
82	1.2e-06	2.85e-05	2.02042	SMU.1768c	hypothetical protein
83	1.3e-06	2.98e-05	0.48144	SMU.1109c	putative integral membrane protein; possible permease
84	1.3e-06	2.98e-05	2.88528	SMU.1335c	putative enoyl-(acyl-carrier-protein) reductase
85	1.3e-06	2.98e-05	0.402477	SMU.299c	putative bacteriocin peptide precursor
86	1.4e-06	3.13e-05	0.313944	SMU.602	putative sodium-dependent transporter
87	1.4e-06	3.13e-05	0.47667	SMU.231	acetolactate synthase, large subunit (AHAS)
88	1.5e-06	3.28e-05	0.463757	SMU.23	phosphoribosyl pyrophosphate synthetase (PRPP synthetase)
89	1.5e-06	3.28e-05	1.94845	SMU.1561	putative potassium uptake system protein TrkB
90	1.6e-06	3.42e-05	2.7027	SMU.1341c	putative gramicidin S synthetase
91	1.6e-06	3.42e-05	0.365652	SMU.1025	putative transcriptional regulator
92	1.7e-06	3.56e-05	0.482841	SMU.1655c	hypothetical protein
93	1.7e-06	3.56e-05	0.497119	SMU.913	putative NADP-specific glutamate dehydrogenase
94	1.8e-06	3.73e-05	3.03051	SMU.1771c	hypothetical protein
95	2e-06	4.05e-05	2.12719	SMU.1156c	hypothetical protein
96	2e-06	4.05e-05	0.473348	SMU.1644c	hypothetical protein
97	2.2e-06	4.41e-05	2.14503	SMU.1566	putative maltose operon transcriptional repressor
98	2.3e-06	4.57e-05	0.506132	SMU.540	peroxide resistance protein Dpr
99	2.4e-06	4.67e-05	3.04357	SMU.1772c	hypothetical protein
100	2.4e-06	4.67e-05	0.474588	SMU.1653	putative D-3-phosphoglycerate dehydrogenase
101	2.5e-06	4.82e-05	2.24746	SMU.1152c	conserved hypothetical protein
102	2.6e-06	4.96e-05	2.06164	SMU.1767c	hypothetical protein
103	2.7e-06	5.1e-05	0.478712	SMU.1585c	putative transcriptional regulator
104	2.8e-06	5.19e-05	0.531955	SMU.1097c	putative transcriptional regulator protein
105	2.8e-06	5.19e-05	0.384333	SMU.730	conserved hypothetical protein
106	2.9e-06	5.23e-05	0.525266	SMU.2158c	putative tryptophanyl-tRNA synthetase
107	2.9e-06	5.23e-05	0.491098	SMU.1961c	putative PTS system, sugar-specific enzyme IIA component
108	2.9e-06	5.23e-05	0.501614	SMU.1654c	putative acetyltransferase
109	3e-06	5.36e-05	0.399039	SMU.672	isocitrate dehydrogenase
110	3.1e-06	5.48e-05	2.38807	SMU.43	putative site-specific DNA-methyltransferase restriction-modification protein
111	3.3e-06	5.73e-05	1.99801	SMU.1154c	hypothetical protein
112	3.3e-06	5.73e-05	0.541195	SMU.1175	putative sodium/amino acid (alanine) symporter
113	3.5e-06	5.92e-05	0.493067	SMU.2162c	conserved hypothetical protein
114	3.5e-06	5.92e-05	0.533822	SMU.567	putative glutamine ABC transporter, permease component
115	3.5e-06	5.92e-05	0.491923	SMU.182	putative ABC transporter, ATP-binding protein; possible iron and/or manganese ABC transport system
116	3.7e-06	6.21e-05	0.516789	SMU.636	putative N-acetylglucosamine-6-phosphate isomerase
117	3.8e-06	6.32e-05	2.02352	SMU.1068c	putative ABC transporter, ATP-binding protein
118	3.9e-06	6.38e-05	0.549182	SMU.1477	putative tRNA isopentenylpyrophosphate transferase
119	3.9e-06	6.38e-05	0.541592	SMU.673	conserved hypothetical protein
120	4e-06	6.43e-05	0.45749	SMU.677	putative transcriptional regulator (MerR family)
121	4e-06	6.43e-05	0.447923	SMU.1787c	putative secreted protein
122	4.1e-06	6.54e-05	0.538842	SMU.232	acetolactate synthase, small subunit
123	4.5e-06	7.06e-05	2.04525	SMU.1562	putative potassium uptake protein TrkA
124	4.5e-06	7.06e-05	2.64402	SMU.1766c	hypothetical protein
125	4.6e-06	7.16e-05	0.452057	SMU.336	putative ribonuclease P protein component
126	4.8e-06	7.41e-05	2.06817	SMU.493	formate acetyltransferase (pyruvate formate-lyase 2)
127	4.9e-06	7.51e-05	2.23365	SMU.1157c	conserved hypothetical protein
128	5e-06	7.6e-05	0.536331	SMU.400	putative secreted esterase
129	5.1e-06	7.69e-05	2.03219	SMU.799c	conserved hypothetical protein
130	5.3e-06	7.81e-05	0.485241	SMU.1896c	hypothetical protein
131	5.3e-06	7.81e-05	0.466948	SMU.1656	putative phosphoserine aminotransferase
132	5.3e-06	7.81e-05	0.521349	SMU.564	conserved hypothetical protein
133	5.4e-06	7.9e-05	0.57013	SMU.399	conserved hypothetical protein
134	5.5e-06	7.93e-05	0.487001	SMU.671	citrate synthase
135	5.5e-06	7.93e-05	2.27206	SMU.138	putative malate permease
136	5.7e-06	8.16e-05	2.39437	SMU.1576c	hypothetical protein
137	5.9e-06	8.32e-05	0.520598	SMU.2077c	conserved hypothetical protein
138	5.9e-06	8.32e-05	0.519012	SMU.1960c	putative PTS system, mannose-specific IIB component
139	6e-06	8.34e-05	2.28844	SMU.685	hypothetical protein
140	6e-06	8.34e-05	0.497865	SMU.2142	putative sugar-phosphate isomerase
141	6.1e-06	8.42e-05	1.92288	SMU.508	conserved hypothetical protein
142	6.2e-06	8.44e-05	2.2426	SMU.500	putative ribosome-associated protein
143	6.2e-06	8.44e-05	0.520704	SMU.338	putative RNA-binding protein, Jag family
144	6.4e-06	8.65e-05	0.551964	SMU.669c	putative glutaredoxin
145	6.6e-06	8.86e-05	0.405266	SMU.2143c	putative tRNA
146	6.8e-06	9e-05	0.546835	SMU.1203	putative branched-chain amino acid aminotransferase IlvE
147	6.8e-06	9e-05	0.523122	SMU.07	putative peptidyl-tRNA hydrolase
148	7e-06	9.2e-05	0.564501	SMU.929c	conserved hypothetical protein
149	7.2e-06	9.4e-05	0.494094	SMU.1298	50S ribosomal protein L31
150	7.5e-06	9.73e-05	0.586801	SMU.278	hypothetical protein
151	7.9e-06	0.0001018	3.3593	SMU.1334	putative phosphopantetheinyl transferase
152	8.1e-06	0.0001037	0.519646	SMU.06	putative GTP-binding protein
153	8.3e-06	0.0001056	1.70025	SMU.106c	tRNA-Thr
154	8.5e-06	0.0001074	0.475024	SMU.731	putative ABC transporter, ATP-binding protein
155	8.7e-06	0.0001092	0.573182	SMU.1669	putative ABC transporter, branched chain amino acid-binding protein
156	9.2e-06	0.0001145	0.520307	SMU.890	conserved hypothetical protein
157	9.3e-06	0.0001145	2.24202	SMU.495	glycerol dehydrogenase
158	9.3e-06	0.0001145	0.589831	SMU.233	ketol-acid reductoisomerase
159	9.8e-06	0.0001199	0.577471	SMU.277	hypothetical protein
160	1.05e-05	0.0001255	0.588253	SMU.596	phosphoglyceromutase
161	1.05e-05	0.0001255	0.559267	SMU.366	NADPH-dependent glutamate synthase (small subunit)
162	1.05e-05	0.0001255	0.508347	SMU.676	NADP-dependent glyceraldehyde-3-phosphate dehydrogenase
163	1.06e-05	0.0001255	0.539828	SMU.1895c	hypothetical protein
164	1.08e-05	0.0001255	2.58478	SMU.1342	putative bacitracin synthetase 1; BacA
165	1.08e-05	0.0001255	2.16192	SMU.1117	NADH oxidase (H2O-forming)
166	1.08e-05	0.0001255	0.601736	SMU.1593c	putative CDP-diglyceride synthetase
167	1.08e-05	0.0001255	3.38595	SMU.1493	tagatose-1,6-bisphosphate aldolase
168	1.09e-05	0.0001255	1.86667	SMU.1075	putative DNA/pantothenate metabolism flavoprotein
169	1.09e-05	0.0001255	1.70074	SMU.226c	putative transposase
170	1.1e-05	0.0001259	0.43178	SMU.668c	ribonucleotide reductase, large subunit
171	1.12e-05	0.0001275	0.521084	SMU.2078c	conserved hypothetical protein
172	1.15e-05	0.0001301	2.1295	SMU.1067c	putative ABC transporter, permease protein
173	1.17e-05	0.0001301	0.59385	SMU.1096	putative ABC transporter, ATP-binding protein, choline transporter
174	1.17e-05	0.0001301	0.595127	SMU.2030	putative transcriptional regulator CtsR
175	1.17e-05	0.0001301	3.57588	SMU.47	hypothetical protein
176	1.19e-05	0.0001316	0.547845	SMU.260	conserved hypothetical protein
177	1.2e-05	0.0001319	0.603298	SMU.725c	conserved hypothetical protein
178	1.25e-05	0.0001367	0.588894	SMU.1295	putative adenosine deaminase
179	1.29e-05	0.0001395	0.603503	SMU.1693	putative hemolysin
180	1.29e-05	0.0001395	0.472369	SMU.991	putative ribonucleotide reductase
181	1.3e-05	0.0001398	0.592938	SMU.2067	putative stress response protein; possible glycosyltransferase involved in cell wall biogenesis
182	1.34e-05	0.0001433	0.577502	SMU.992	hypothetical protein
183	1.38e-05	0.0001457	0.576932	SMU.2141	glucose inhibited division protein homolog GidA
184	1.38e-05	0.0001457	1.84628	SMU.675	phosphoenolpyruvate:sugar phosphotransferase system enzyme I, PTS system EI component
185	1.39e-05	0.0001457	1.69564	SMU.1765c	hypothetical protein
186	1.4e-05	0.0001457	0.563721	SMU.989	aspartate-semialdehyde dehydrogenase
187	1.4e-05	0.0001457	3.15675	SMU.46	hypothetical protein
188	1.43e-05	0.0001472	0.603085	SMU.928	putative histidine kinase
189	1.43e-05	0.0001472	1.98301	SMU.1405c	conserved hypothetical protein
190	1.5e-05	0.0001536	0.530618	SMU.2154c	putative peptidase
191	1.53e-05	0.0001559	0.360477	SMU.1657c	putative nitrogen regulatory protein PII
192	1.57e-05	0.0001591	2.59479	SMU.683	putative ATP-binding protein
193	1.66e-05	0.0001665	0.597426	SMU.367	hypothetical protein
194	1.66e-05	0.0001665	0.59538	SMU.245	putative negative regulator of genetic competence MecA
195	1.67e-05	0.0001667	2.73941	SMU.89c	putative nitrite transporter
196	1.71e-05	0.0001698	0.428295	SMU.20	putative cell shape-determining protein MreC
197	1.76e-05	0.0001739	0.582592	SMU.1112c	conserved hypothetical protein
198	1.82e-05	0.0001789	0.54326	SMU.2079c	conserved hypothetical protein
199	1.85e-05	0.0001809	0.47318	SMU.1649	putative exodeoxyribonuclease III
200	1.9e-05	0.0001849	1.85424	SMU.1124	putative pyrimidine-nucleoside phosphorylase
201	1.93e-05	0.0001851	4.48272	SMU.1340	putative surfactin synthetase
202	1.93e-05	0.0001851	1.6316	SMU.888	UDP-galactose 4-epimerase, GalE
203	1.94e-05	0.0001851	0.517714	SMU.925	hypothetical protein
204	1.95e-05	0.0001851	2.3974	SMU.1402c	conserved hypothetical protein
205	1.95e-05	0.0001851	0.624769	SMU.698	50S ribosomal protein L35
206	2.01e-05	0.000189	0.594182	SMU.479	RNA polymerase-associated protein RpoZ, omega subunit
207	2.01e-05	0.000189	1.79542	SMU.1843	sucrose-6-phosphate hydrolase
208	2.03e-05	0.0001899	0.49231	SMU.1479	conserved hypothetical protein
209	2.07e-05	0.0001927	0.557606	SMU.1294	putative flavodoxin
210	2.09e-05	0.0001937	0.466749	SMU.895	possible DNA-damage-inducible protein
211	2.1e-05	0.0001937	1.93142	SMU.140	putative glutathione reductase
212	2.11e-05	0.0001937	0.597903	SMU.1476c	putative GTP-binding protein
213	2.16e-05	0.0001973	2.72878	SMU.791c	hypothetical protein
214	2.21e-05	0.0001991	0.559902	SMU.1723c	conserved hypothetical protein
215	2.21e-05	0.0001991	0.617859	SMU.184	putative ABC transporter, metal binding lipoprotein; surface adhesin precursor; saliva-binding protein; lipoprotein receptor LraI (LraI family)
216	2.21e-05	0.0001991	2.98585	SMU.1488c	conserved hypothetical protein
217	2.26e-05	0.0002017	0.328206	SMU.42	conserved hypothetical protein
218	2.27e-05	0.0002017	0.607657	SMU.426	copper-transporting ATPase; P-type ATPase
219	2.27e-05	0.0002017	0.584471	SMU.234	threonine dehydratase
220	2.28e-05	0.0002017	1.7668	SMU.1182	mannitol-1-phosphate dehydrogenase
221	2.43e-05	0.0002139	0.614554	SMU.32	phosphoribosylpyrophosphate amidotransferase
222	2.44e-05	0.0002139	0.569446	SMU.568	putative amino acid ABC transporter, ATP-binding protein
223	2.47e-05	0.0002155	0.539547	SMU.2083c	hypothetical protein
224	2.49e-05	0.0002163	2.09462	SMU.1087	putative 4-oxalocrotonate tautomerase
225	2.55e-05	0.0002182	0.574791	SMU.734	conserved hypothetical protein; possible membrane protein
226	2.55e-05	0.0002182	0.633753	SMU.1190	pyruvate kinase
227	2.56e-05	0.0002182	2.65247	SMU.1575c	hypothetical protein
228	2.57e-05	0.0002182	0.613838	SMU.1377c	conserved hypothetical protein
229	2.57e-05	0.0002182	1.99631	SMU.1126	putative pantothenate kinase
230	2.58e-05	0.0002182	1.57707	SMU.1904c	hypothetical protein
231	2.59e-05	0.0002182	0.593661	SMU.995	putative ABC transporter, permease protein; possible ferrichrome transport system
232	2.62e-05	0.0002198	0.625011	SMU.388	putative integral membrane protein; possible branched-chain amino acid permease
233	2.65e-05	0.0002213	2.64662	SMU.876	putative MSM operon regulatory protein
234	2.67e-05	0.000222	2.6373	SMU.684	hypothetical protein
235	2.69e-05	0.0002226	0.54113	SMU.2032	30S ribosomal protein S2
236	2.7e-05	0.0002226	1.61424	SMU.674	phosphoenolpyruvate:sugar phosphotransferase system HPr
237	2.76e-05	0.0002257	0.521596	SMU.1502c	conserved hypothetical protein
238	2.76e-05	0.0002257	0.628664	SMU.1041	putative ABC transporter, ATP-binding protein
239	2.91e-05	0.0002349	1.64095	SMU.141	conserved hypothetical protein
240	2.91e-05	0.0002349	0.626938	SMU.1997	16S ribosomal RNA
241	2.94e-05	0.0002349	0.613946	SMU.793	conserved hypothetical protein
242	2.95e-05	0.0002349	1.6052	SMU.2050c	putative methyltransferase
243	2.96e-05	0.0002349	1.58191	SMU.2036	putative peptidase
244	2.97e-05	0.0002349	0.587831	SMU.891	type I restriction-modification system DNA methylase
245	2.97e-05	0.0002349	0.622064	SMU.1572	putative UDP-N-acetylglucosamine-1-carboxyvinyl transferase
246	2.97e-05	0.0002349	0.634645	SMU.1367c	conserved hypothetical protein
247	3e-05	0.0002351	0.637513	SMU.185	hypothetical protein
248	3e-05	0.0002351	0.480258	SMU.1196c	conserved hypothetical protein
249	3.01e-05	0.0002351	0.642344	SMU.947	putative dihydrofolate reductase
250	3.02e-05	0.0002351	0.637988	SMU.1111c	conserved hypothetical protein
251	3.06e-05	0.0002372	0.640347	SMU.898	conserved hypothetical protein
252	3.08e-05	0.0002378	0.604327	SMU.247	putative ABC transporter, ATP-binding protein
253	3.1e-05	0.0002384	0.61831	SMU.824	dTDP-4-keto-L-rhamnose reductase
254	3.12e-05	0.000239	0.578004	SMU.333	hypothetical protein
255	3.23e-05	0.0002463	1.64845	SMU.744	putative cell division protein FtsY; signal recognition particle (docking protein)
256	3.24e-05	0.0002463	2.55485	SMU.1052	conserved hypothetical protein
257	3.28e-05	0.0002479	0.600769	SMU.1745c	putative transcriptional regulator
258	3.29e-05	0.0002479	0.593192	SMU.2003	30S ribosomal protein S13
259	3.3e-05	0.0002479	2.60305	SMU.1337c	putative alpha/beta superfamily hydrolase
260	3.38e-05	0.000253	0.549467	SMU.2040	putative transcriptional regulator; repressor of the trehalose operon
261	3.47e-05	0.0002587	0.619051	SMU.2071	putative anaerobic ribonucleotide reductase activating protein
262	3.58e-05	0.0002659	0.423451	SMU.630	hypothetical protein
263	3.66e-05	0.0002702	0.61757	SMU.1444c	conserved hypothetical protein
264	3.67e-05	0.0002702	2.17321	SMU.93c	hypothetical protein; putative transposase fragment
265	3.68e-05	0.0002702	1.76897	SMU.1183	PTS system, mannitol-specific enzyme IIA
266	3.7e-05	0.0002707	0.62643	SMU.530c	conserved hypothetical protein
267	3.83e-05	0.0002791	2.0768	SMU.1012c	putative transcriptional regulator
268	3.94e-05	0.0002847	0.613193	SMU.368c	conserved hypothetical protein
269	3.94e-05	0.0002847	0.60385	SMU.1168	putative transcriptional regulator
270	3.95e-05	0.0002847	1.5767	SMU.1037c	putative histidine kinase
271	3.99e-05	0.0002865	0.585109	SMU.1437	putative UDP-N-acetylglucosamine 2-epimerase
272	4.08e-05	0.0002919	1.79178	SMU.2049c	conserved hypothetical protein
273	4.16e-05	0.0002965	0.612774	SMU.1956c	hypothetical protein
274	4.28e-05	0.000304	1.599	SMU.139	conserved hypothetical protein
275	4.3e-05	0.0003043	0.625009	SMU.2072c	conserved hypothetical protein; possible acetyltransferase
276	4.35e-05	0.0003056	1.71178	SMU.1039c	putative lipopolysaccharide glycosyltransferase
277	4.35e-05	0.0003056	0.559668	SMU.381c	conserved hypothetical protein
278	4.51e-05	0.0003157	0.642899	SMU.1744	putative 3-oxoacyl-[acyl-carrier-protein] synthase III
279	4.56e-05	0.0003169	0.604306	SMU.1707c	putative rRNA methylase
280	4.56e-05	0.0003169	0.649195	SMU.1923c	conserved hypothetical protein
281	4.63e-05	0.0003206	0.653843	SMU.820	conserved hypothetical protein
282	4.65e-05	0.0003209	0.606277	SMU.2138	putative replicative DNA helicase (DNA polymerase III delta prime subunit)
283	4.7e-05	0.0003232	1.85933	SMU.1883	conserved hypothetical protein
284	4.72e-05	0.0003234	0.63977	SMU.1237c	hypothetical protein
285	4.77e-05	0.0003257	1.86842	SMU.1404c	conserved hypothetical protein
286	5.03e-05	0.0003423	0.559895	SMU.2028	levansucrase precursor; beta-D-fructosyltransferase
287	5.18e-05	0.0003507	0.564195	SMU.1667	putative branched chain amino acid ABC transporter, permease protein
288	5.19e-05	0.0003507	2.76406	SMU.1091	hypothetical protein; possible cell wall protein, WapE
289	5.26e-05	0.0003542	0.643127	SMU.927	putative response regulator
290	5.28e-05	0.0003543	0.612365	SMU.823	conserved hypothetical protein
291	5.38e-05	0.0003598	0.645743	SMU.1191	6-phosphofructokinase
292	5.43e-05	0.0003602	0.64406	SMU.1897	putative ABC transporter, ATP-binding protein
293	5.44e-05	0.0003602	1.61478	SMU.1011	putative CitG protein
294	5.45e-05	0.0003602	0.647743	SMU.1108c	conserved hypothetical protein
295	5.46e-05	0.0003602	0.612982	SMU.1666	putative branched chain amino acid ABC transporter, ATP-binding protein
296	5.48e-05	0.0003603	0.641362	SMU.1645	putative tellurite resistance protein
297	5.53e-05	0.0003623	1.54425	SMU.356	purine operon repressor
298	5.66e-05	0.000369	0.585448	SMU.1579	hypothetical protein
299	5.67e-05	0.000369	0.6329	SMU.154	30S ribosomal protein S15
300	5.81e-05	0.0003769	0.597606	SMU.2139c	50S ribosomal protein L9
301	5.85e-05	0.0003782	1.51005	SMU.1252	putative glycerate kinase
302	5.96e-05	0.000384	0.668969	SMU.1663	putative thymidylate kinase
303	6.07e-05	0.0003886	0.542895	SMU.758c	conserved hypothetical protein
304	6.08e-05	0.0003886	0.585437	SMU.1652	putative methylated-DNA--protein-cysteine S-methyltransferase
305	6.1e-05	0.0003886	1.55865	SMU.88c	conserved hypothetical protein; possible mechanosensitive ion channel
306	6.11e-05	0.0003886	1.58217	SMU.1260c	conserved hypothetical protein
307	6.13e-05	0.0003886	0.639022	SMU.2164	serine protease HtrA
308	6.36e-05	0.0004011	0.593497	SMU.1668	putative branched chain amino acid ABC transporter, permease protein
309	6.37e-05	0.0004011	0.632421	SMU.921	putative transcriptional regulator
310	6.39e-05	0.0004011	2.29808	SMU.112c	putative transcriptional regulator
311	6.45e-05	0.0004036	0.649856	SMU.1396	glucan-binding protein C, GbpC
312	6.5e-05	0.0004054	0.62381	SMU.1201c	conserved hypothetical protein
313	6.54e-05	0.0004066	0.533772	SMU.562	ATP-dependent protease ClpE
314	6.66e-05	0.0004127	0.672832	SMU.822	DNA-dependent RNA polymerase sigma subunit; major sigma factor (sigma 70/42)
315	6.68e-05	0.0004127	0.571474	SMU.732	conserved hypothetical protein; possible inner membrane protein
316	6.9e-05	0.0004249	0.64514	SMU.794	hypothetical protein
317	6.97e-05	0.0004279	1.80898	SMU.1147c	hypothetical protein
318	7.15e-05	0.0004375	1.7153	SMU.1151c	conserved hypothetical protein
319	7.18e-05	0.000438	0.630176	SMU.639	putative acetyltransferase
320	7.34e-05	0.0004464	0.662642	SMU.1366c	putative ABC transporter; ATP-binding protein
321	7.64e-05	0.0004632	1.5707	SMU.355	putative CMP-binding factor
322	7.68e-05	0.0004641	0.664784	SMU.1876	conserved hypothetical protein
323	7.74e-05	0.0004663	0.598789	SMU.480	primosomal replication factor Y (primosomal protein N')
324	7.84e-05	0.0004709	1.74371	SMU.1038c	putative response regulator
325	7.87e-05	0.0004712	0.633269	SMU.337	conserved hypothetical protein; putative membrane protein
326	7.97e-05	0.0004758	0.637668	SMU.611	putative ATP-dependent RNA helicase, DEAD-box family
327	8.06e-05	0.0004794	0.626977	SMU.183	putative Mn/Zn ABC transporter
328	8.08e-05	0.0004794	1.6568	SMU.2128	putative dihydroxy-acid dehydratase
329	8.13e-05	0.0004809	1.93665	SMU.1403c	conserved hypothetical protein
330	8.2e-05	0.0004836	2.10159	SMU.137	malolactic enzyme
331	8.29e-05	0.0004871	1.62702	SMU.225c	hypothetical protein
332	8.31e-05	0.0004871	2.9221	SMU.1489	conserved hypothetical protein, LacX
333	8.43e-05	0.0004926	0.631313	SMU.2031	putative translation elongation factor TS
334	8.5e-05	0.0004952	0.652599	SMU.569	putative ferrous ion transport protein A
335	8.55e-05	0.0004967	0.591164	SMU.1651	putative arsenate reductase
336	8.79e-05	0.0005075	0.675212	SMU.757	hypothetical protein
337	8.83e-05	0.0005075	0.655315	SMU.53	conserved hypothetical protein
338	8.84e-05	0.0005075	0.581151	SMU.1670c	conserved hypothetical protein
339	8.84e-05	0.0005075	0.655803	SMU.2018	30S ribosomal protein S17
340	8.97e-05	0.0005134	0.658476	SMU.1650	putative endonuclease III (DNA repair)
341	9.04e-05	0.0005154	0.631829	SMU.2073c	conserved hypothetical protein
342	9.08e-05	0.0005154	1.98197	SMU.10	conserved hypothetical protein
343	9.09e-05	0.0005154	0.619996	SMU.424	negative transcriptional regulator, CopY
344	9.11e-05	0.0005154	2.28935	SMU.1343c	putative polyketide synthase
345	9.29e-05	0.000524	0.635112	SMU.1611c	putative permease; possible multi-drug resistance efflux pump
346	9.35e-05	0.0005259	0.679145	SMU.1742c	putative trans-2-enoyl-ACP reductase
347	9.51e-05	0.0005318	0.625667	SMU.330	putative glutamyl-tRNA synthetase
348	9.51e-05	0.0005318	0.582421	SMU.1969c	putative transcriptional regulator
349	9.56e-05	0.0005326	0.577052	SMU.1627	50S ribosomal L11 protein
350	9.58e-05	0.0005326	0.583371	SMU.1988c	putative DNA binding protein
351	9.68e-05	0.0005367	0.655271	SMU.1278c	conserved hypothetical protein
352	9.77e-05	0.0005397	1.6748	SMU.1076	putative membrane protein
353	9.79e-05	0.0005397	0.546199	SMU.958	hypothetical protein
354	9.9e-05	0.0005442	1.66226	SMU.1040c	putative oxidoreductase, short-chain dehydrogenase/reductase
355	0.0001	0.0005482	0.648103	SMU.2097	hypothetical protein
356	0.0001019	0.000557	0.669118	SMU.332	conserved hypothetical protein
357	0.0001034	0.0005636	0.608855	SMU.478	putative guanylate kinase
358	0.0001039	0.0005648	1.83653	SMU.1728	putative transcription elongation factor GreA
359	0.0001042	0.0005648	0.626096	SMU.1384	putative 2-isopropylmalate synthase
360	0.0001079	0.0005833	1.55151	SMU.206c	hypothetical protein
361	0.0001084	0.0005843	0.668685	SMU.1169c	putative thioredoxin family protein
362	0.0001104	0.0005934	0.691511	SMU.26	putative fatty acid/phospholipid synthesis protein
363	0.0001107	0.0005934	0.617043	SMU.1722c	putative integral membrane protein
364	0.0001112	0.0005945	0.689209	SMU.957	50S ribosomal protein L10
365	0.0001125	0.0005998	0.669859	SMU.1634c	conserved hypothetical protein
366	0.0001133	0.0006024	2.75677	SMU.1336	conserved hypothetical protein PksD, involved in polyketide synthesis
367	0.0001146	0.0006077	0.676423	SMU.1786	putative undecaprenyl pyrophosphate synthetase
368	0.0001159	0.0006129	1.48571	SMU.1905c	putative bacteriocin secretion protein
369	0.000119	0.0006269	1.59287	SMU.1389	conserved hypothetical protein
370	0.0001192	0.0006269	0.673887	SMU.49	hypothetical protein
371	0.0001241	0.0006509	0.585461	SMU.680	putative gamma-carboxymuconolactone decarboxylase subunit
372	0.0001259	0.0006586	0.672524	SMU.1446c	putative ABC transporter, permease protein
373	0.0001285	0.0006704	0.668893	SMU.712	putative phosphoenolpyruvate carboxylase
374	0.0001289	0.0006705	0.693161	SMU.1309c	putative glycerol dehydrogenase
375	0.0001294	0.0006705	1.70445	SMU.110	putative transcriptional regulator MutR
376	0.0001299	0.0006705	0.595998	SMU.1788c	putative bacterocin transport accessory protein, Bta
377	0.0001299	0.0006705	0.627681	SMU.1578	putative biotin operon repressor
378	0.000131	0.0006744	0.599251	SMU.1375c	hypothetical protein
379	0.0001328	0.0006819	1.49286	SMU.1079c	putative ABC transporter, ATP-binding protein
380	0.0001347	0.0006898	0.611151	SMU.2102	histidyl-tRNA synthetase (histidine--tRNA ligase)
381	0.0001359	0.0006941	0.593928	SMU.127	putative acetoin dehydrogenase (TPP-dependent), E1 component alpha subunit
382	0.0001386	0.0007061	2.05963	SMU.1563	putative cation-transporting P-type ATPase PacL
383	0.0001392	0.0007064	0.544462	SMU.2157	inosine monophosphate dehydrogenase
384	0.0001394	0.0007064	0.649245	SMU.1705	hypothetical protein
385	0.0001418	0.0007154	0.702003	SMU.1637c	hypothetical protein
386	0.0001419	0.0007154	0.662348	SMU.228	putative alkaline-shock protein homolog
387	0.0001431	0.0007196	2.07117	SMU.1010	putative citrate lyase ligase
388	0.0001437	0.0007204	0.657042	SMU.1602	putative NAD(P)H-flavin oxidoreductase
389	0.000144	0.0007204	0.573359	SMU.1976c	hypothetical protein
390	0.0001446	0.0007208	0.656937	SMU.1636c	conserved hypothetical protein
391	0.000145	0.0007208	0.600784	SMU.735	hypothetical protein
392	0.0001452	0.0007208	0.698513	SMU.83	heat shock protein DnaJ (HSP-40)
393	0.0001461	0.0007226	0.648491	SMU.1665	putative branched chain amino acid ABC transporter, ATP-binding protein
394	0.0001463	0.0007226	0.646778	SMU.1694c	putative permease
395	0.0001468	0.0007229	0.563858	SMU.670	aconitate hydratase; aconitase
396	0.0001471	0.0007229	0.649166	SMU.391c	conserved hypothetical protein
397	0.0001495	0.0007328	0.655502	SMU.1968c	conserved hypothetical protein
398	0.0001514	0.0007403	2.28907	SMU.44	conserved hypothetical protein; possible DNA mismatch repair protein
399	0.0001532	0.0007472	0.689985	SMU.889	putative penicillin-binding protein, class C; fmt-like protein
400	0.0001555	0.0007565	2.03787	SMU.1591	catabolite control protein A, CcpA
401	0.0001613	0.0007828	0.654451	SMU.557	putative cell division protein DivIVA
402	0.0001619	0.0007837	0.322247	SMU.2140c	conserved hypothetical protein
403	0.0001652	0.0007977	0.700657	SMU.1129	putative response regulator CiaR
404	0.0001661	0.0008001	0.707764	SMU.1971c	putative thioredoxin H1
405	0.0001694	0.000814	0.703122	SMU.1660c	conserved hypothetical protein
406	0.0001706	0.0008161	0.606744	SMU.453	conserved hypoyhetical protein
407	0.0001707	0.0008161	0.66341	SMU.1638c	hypothetical protein
408	0.0001711	0.0008161	0.60971	SMU.1743	putative acyl carrier protein
409	0.0001721	0.0008188	0.634151	SMU.363	transcriptional regulator; glutamine synthetase repressor
410	0.0001733	0.0008225	0.628947	SMU.997	putative inorganic ion ABC transporter, ATP-binding protein; possible ferrichrome transport system
411	0.000178	0.0008428	0.690565	SMU.1276c	putative septation ring formation regulator
412	0.0001791	0.0008459	0.671538	SMU.01	chromosomal replication initiator protein, DnaA
413	0.0001799	0.0008477	1.68108	SMU.1074	putative flavoprotein involved in panthothenate metabolism
414	0.000184	0.0008626	0.620051	SMU.2161c	conserved hypothetical protein
415	0.000184	0.0008626	0.657842	SMU.1170	putative cytochrome C biogenesis protein
416	0.0001844	0.0008626	0.677595	SMU.362	conserved hypothetical protein
417	0.000185	0.0008633	0.69411	SMU.1965c	putative histidine kinase
418	0.0001877	0.0008738	0.61807	SMU.1445c	putative ABC transporter, ATP-binding protein
419	0.0001902	0.0008801	0.621921	SMU.996	putative ABC transporter, permease protein; possible ferrichrome transport system
420	0.0001902	0.0008801	0.669121	SMU.796	conserved hypothetical protein
421	0.0001904	0.0008801	0.59646	SMU.389	conserved hypothetical protein
422	0.0001918	0.0008845	0.628547	SMU.632	putative transcriptional regulator
423	0.0001927	0.0008865	0.692118	SMU.344	hypothetical protein
424	0.0001958	0.0008986	0.572264	SMU.988	putative cardiolipin synthase
425	0.0002	0.0009158	1.58587	SMU.1078c	putative ABC transporter, ATP-binding protein
426	0.0002018	0.0009218	1.92427	SMU.1729c	putative aminodeoxychorismate lyase (fragment)
427	0.0002043	0.0009311	0.64686	SMU.627	conserved hypothetical protein
428	0.0002049	0.0009316	0.566951	SMU.1641c	conserved hypothetical protein
429	0.0002065	0.0009367	0.62318	SMU.2135c	30S ribosomal protein S4
430	0.0002094	0.0009477	0.51252	SMU.771c	hypothetical protein
431	0.0002147	0.0009689	0.678095	SMU.1447c	conserved hypothetical protein
432	0.0002151	0.0009689	1.58621	SMU.507	putative transcriptional regulator (DeoR family)
433	0.0002175	0.0009775	0.699524	SMU.1966c	putative periplasmic sugar-binding protein
434	0.0002183	0.0009775	0.666953	SMU.850	conserved hypothetical protein
435	0.0002185	0.0009775	0.708483	SMU.551	cell division protein FtsA
436	0.0002212	0.0009841	0.698984	SMU.825	putative RgpAc; glycosyltransferase
437	0.0002214	0.0009841	0.690573	SMU.303	conserved hypothetical protein
438	0.0002215	0.0009841	0.683552	SMU.1573	putative S-adenosylmethionine synthetase
439	0.0002228	0.0009876	0.679624	SMU.1673	uracil phosphoribosyltransferase
440	0.0002233	0.0009876	0.638046	SMU.21	putative cell shape-determining protein MreD
441	0.0002281	0.0010065	0.694779	SMU.1993	putative ABC transporter, zinc permease protein
442	0.0002305	0.0010148	1.55274	SMU.78	fructan hydrolase; exo-beta-D-fructosidase; fructanase, FruA
443	0.000234	0.0010279	0.653555	SMU.369c	conserved hypothetical protein
444	0.0002389	0.0010471	1.47065	SMU.490	putative pyruvate formate-lyase activating enzyme
445	0.0002434	0.0010644	0.703442	SMU.679	putative oxidoreductase, aldo/keto reductase family
446	0.0002458	0.0010725	0.704758	SMU.1972c	conserved hypothetical protein
447	0.0002468	0.0010744	0.674378	SMU.2088	putative Holliday junction DNA helicase RuvA
448	0.0002482	0.0010781	0.688315	SMU.1990	DNA-dependent RNA polymerase, beta subunit
449	0.0002515	0.0010889	0.690989	SMU.865	30S ribosomal protein S16
450	0.0002518	0.0010889	1.49084	SMU.1710c	conserved hypothetical protein
451	0.0002566	0.0011072	0.655786	SMU.1188	putative signal peptidase
452	0.0002585	0.0011129	0.682501	SMU.1975c	conserved hypothetical protein; possible membrane protein
453	0.0002601	0.0011173	1.48071	SMU.1482c	conserved hypothetical protein
454	0.0002611	0.0011192	1.70817	SMU.1084	putative protoporphyrinogen oxidase
455	0.0002636	0.0011274	0.664588	SMU.631	conserved hypothetical protein
456	0.0002669	0.001139	0.654282	SMU.22	putative secreted antigen GbpB/SagA; putative peptidoglycan hydrolase
457	0.0002678	0.0011403	0.673644	SMU.1189c	conserved hypothetical protein
458	0.0002689	0.0011425	0.644813	SMU.1247	putative enolase
459	0.0002711	0.0011494	0.696599	SMU.170	30S ribosomal protein S9
460	0.0002719	0.0011503	0.697637	SMU.806c	putative glutamine ABC transporter, permease protein
461	0.0002727	0.0011508	0.675304	SMU.524	putative ABC transporter, ATP-binding protein
462	0.0002732	0.0011508	0.695936	SMU.648	putative protease maturation protein precursor
463	0.0002744	0.0011533	1.63821	SMU.1070c	conserved hypothetical protein
464	0.0002751	0.0011538	0.704388	SMU.1626	50S ribosomal protein L1
465	0.0002759	0.0011546	0.597702	SMU.2025	50S ribosomal protein L3
466	0.0002779	0.0011605	0.576159	SMU.1706	conserved hypothetical protein
467	0.0002818	0.0011743	0.704942	SMU.1648c	hypothetical protein
468	0.0002826	0.0011751	0.719259	SMU.1284c	conserved hypothetical protein
469	0.0002843	0.0011796	0.621802	SMU.1671c	conserved hypothetical protein
470	0.0002851	0.0011804	0.709813	SMU.1779c	putative RNA methyltransferase
471	0.0002877	0.0011866	1.42624	SMU.1938c	putative ABC transporter, permease protein
472	0.0002878	0.0011866	0.606552	SMU.998	putative ABC transporter, periplasmic ferrichrome-binding protein
473	0.0002889	0.0011881	0.719486	SMU.331	putative transcriptional regulator
474	0.0002894	0.0011881	0.700251	SMU.08	putative transcription-repair coupling factor
475	0.0002943	0.0012057	0.720379	SMU.1846c	conserved hypothetical protein
476	0.0002969	0.0012138	0.657297	SMU.390	hypothetical protein
477	0.0003023	0.0012333	0.684791	SMU.641	putative oxidoreductase
478	0.0003056	0.0012441	0.673189	SMU.571	hypothetical protein
479	0.0003071	0.0012476	1.44613	SMU.109	conserved hypothetical protein; possible permease (efflux protein)
480	0.0003088	0.0012518	0.67257	SMU.1814	putative histidine kinase, ScnK homolog
481	0.0003094	0.0012518	0.717712	SMU.343	hypothetical protein
482	0.0003153	0.001273	0.697219	SMU.518	conserved hypothetical protein
483	0.0003178	0.0012804	0.717022	SMU.2093	putative transcriptional regulator of arginine metabolism
484	0.0003221	0.0012951	0.725217	SMU.960	50S ribosomal protein L7/L12
485	0.0003243	0.0013012	0.695437	SMU.1315c	putative ATP-binding protein
486	0.0003274	0.0013109	1.92348	SMU.502	conserved hypothetical protein
487	0.0003298	0.0013178	0.67934	SMU.235	conserved hypothetical protein
488	0.0003319	0.0013235	0.616498	SMU.2026c	30S ribosomal protein S10
489	0.000336	0.0013344	0.662903	SMU.2104a	50S ribosomal protein L32
490	0.000336	0.0013344	0.594002	SMU.1632	putative MTA/SAH nucleosidase
491	0.0003369	0.0013349	0.695698	SMU.922	putative ABC transporter, ATP-binding protein
492	0.0003375	0.0013349	0.705934	SMU.1582c	conserved hypothetical protein
493	0.0003387	0.0013369	0.536769	SMU.1983	putative competence protein ComYD
494	0.0003447	0.0013579	0.70573	SMU.1955	putative co-chaperonin GroES
495	0.0003491	0.0013724	0.681009	SMU.246	putative glycosyl transferase N-acetylglucosaminyltransferase), RgpG
496	0.0003505	0.0013751	0.625257	SMU.2074	putative anaerobic ribonucleoside-triphosphate reductase
497	0.0003533	0.0013833	1.42416	SMU.1487	conserved hypothetical protein
498	0.0003559	0.0013907	2.75043	SMU.1339	putative bacitracin synthetase
499	0.0003575	0.0013942	0.590948	SMU.941c	conserved hypothetical protein
500	0.0003622	0.0014051	0.62702	SMU.1211	conserved hypothetical protein
501	0.0003625	0.0014051	0.679643	SMU.561c	putative hydrolase (MutT family)
502	0.0003631	0.0014051	1.5596	SMU.574c	putative membrane protein
503	0.0003633	0.0014051	0.690565	SMU.711	conserved hypothetical protein
504	0.0003639	0.0014051	0.656066	SMU.1131c	hypothetical protein
505	0.0003665	0.0014123	0.729641	SMU.649	conserved hypothetical protein
506	0.0003686	0.0014171	0.606917	SMU.186	putative metal-dependent transcriptional regulator
507	0.0003692	0.0014171	0.683617	SMU.167	hypothetical protein
508	0.0003715	0.0014231	0.704266	SMU.618	hypothetical protein
509	0.0003751	0.0014316	0.616231	SMU.2129c	conserved hypothetical protein
510	0.0003752	0.0014316	0.640055	SMU.31	hypothetical protein
511	0.0003766	0.0014342	1.49546	SMU.963c	conserved hypothetical protein; putative deacetylase
512	0.000379	0.0014405	0.725326	SMU.1624	putative ribosome recycling factor
513	0.0003812	0.001446	0.6923	SMU.616	hypothetical protein
514	0.0003839	0.0014534	0.721352	SMU.697	putative translation initiation factor IF3
515	0.000386	0.0014576	0.706463	SMU.948	conserved hypothetical protein
516	0.0003865	0.0014576	0.692345	SMU.2120c	putative 3-methyladenine DNA glycosylase
517	0.0003924	0.0014749	0.680527	SMU.229	conserved hypothetical protein
518	0.0003926	0.0014749	0.707119	SMU.1200	tRNA-Tyr
519	0.0004012	0.0015043	0.731855	SMU.1118c	putative ABC sugar transporter, permease protein
520	0.0004036	0.0015104	0.713531	SMU.1635	putative UDP-N-acetylglucosamine pyrophosphorylase
521	0.0004113	0.0015363	0.695573	SMU.1325	putative ABC transporter, ATP-binding component
522	0.0004141	0.0015438	0.636079	SMU.944	thymidylate synthase
523	0.0004158	0.0015445	0.657384	SMU.638	putative 16S pseudouridylate synthase
524	0.0004159	0.0015445	0.721209	SMU.2136c	hypothetical protein
525	0.0004239	0.0015713	0.680522	SMU.899	conserved hypothetical protein
526	0.0004353	0.001608	0.72391	SMU.1996	putative isopentenyl monophosphate kinase
527	0.0004355	0.001608	1.41985	SMU.1483c	conserved hypothetical protein
528	0.0004363	0.001608	0.711167	SMU.1120	putative sugar ABC transporter, ATP-binding protein
529	0.0004444	0.0016348	0.599253	SMU.896	conserved hypothetical protein
530	0.0004547	0.0016693	1.86508	SMU.1773c	hypothetical protein
531	0.0004555	0.0016693	0.717337	SMU.699	50S ribosomal protein L20
532	0.0004621	0.0016903	0.673512	SMU.926	conserved hypothetical protein; possible GTP-pyrophosphokinase
533	0.0004686	0.0017109	0.732198	SMU.346	putative NADH dehydrogenase; NAD(P)H nitroreductase
534	0.0004889	0.0017816	0.736042	SMU.1106c	conserved hypothetical protein; phosphoglycerate mutase-like protein
535	0.0005026	0.0018281	0.717355	SMU.1628	conserved hypothetical protein
536	0.0005039	0.001829	0.7302	SMU.475	conserved hypothetical protein
537	0.0005047	0.001829	0.709827	SMU.272	putative PTS system, enzyme IIA component
538	0.0005099	0.0018444	1.40603	SMU.307	glucose-6-phosphate isomerase
539	0.0005226	0.0018868	0.73848	SMU.764	alkyl hydroperoxide reductase
540	0.0005245	0.0018901	0.655573	SMU.1061	putative DNA-binding protein
541	0.0005264	0.0018935	1.45606	SMU.224c	hypothetical protein
542	0.000544	0.0019532	0.701725	SMU.678	putative oxidoreductase, aldo/keto reductase family
543	0.0005491	0.0019679	1.37696	SMU.543	conserved hypothetical protein
544	0.0005508	0.0019703	0.728007	SMU.838	glutathione reductase
545	0.0005536	0.0019767	0.694558	SMU.1429	putative UDP-N-acetylmuramyl tripeptide synthetase MurC
546	0.0005549	0.0019777	0.71043	SMU.1721c	putative diaminopimelate decarboxylase
547	0.0005592	0.0019894	1.45277	SMU.1505c	hypothetical protein
548	0.0005644	0.0020042	1.73003	SMU.1072c	putative acetyltransferase
549	0.0005689	0.0020165	0.696718	SMU.642	hypothetical protein
550	0.0005702	0.0020175	1.35039	SMU.542	putative glucose kinase
551	0.00059	0.0020837	0.569717	SMU.96	putative DNA-directed RNA polymerase, delta subunit
552	0.0005913	0.0020845	0.695434	SMU.2116	putative osmoprotectant amino acid ABC transporter, ATP-binding protein
553	0.0005946	0.0020924	0.750401	SMU.459	putative ABC transporter, amino acid binding protein
554	0.0006044	0.002123	0.742805	SMU.667	putative ribonucleotide reductase, small subunit
555	0.0006062	0.0021231	0.731951	SMU.1286c	putative permease; multidrug efflux protein
556	0.0006066	0.0021231	1.62397	SMU.1712c	conserved hypothetical protein
557	0.0006115	0.0021364	0.628691	SMU.644	putative competence protein/transcription factor
558	0.000627	0.0021866	0.749624	SMU.1104c	conserved hypothetical protein; phosphoglycerate mutase-like protein
559	0.00063	0.0021932	0.687351	SMU.1128	putative histidine kinase sensor CiaH
560	0.0006341	0.0022035	0.694868	SMU.937	putative mevalonate diphosphate decarboxylase
561	0.0006412	0.0022242	0.752705	SMU.1612c	conserved hypothetical protein
562	0.0006433	0.0022275	0.659064	SMU.1982c	conserved hypothetical protein
563	0.0006492	0.0022439	0.697978	SMU.752	conserved hypothetical protein
564	0.0006642	0.0022917	1.5376	SMU.1158c	conserved hypothetical protein
565	0.0006731	0.0023141	0.698359	SMU.1114	DNA gyrase A subunit
566	0.0006734	0.0023141	0.742949	SMU.2075c	conserved hypothetical protein
567	0.0006758	0.0023141	0.744538	SMU.1702c	putative phosphatase
568	0.000676	0.0023141	1.44133	SMU.1086	putative thymidine kinase
569	0.0006773	0.0023141	0.752951	SMU.281	hypothetical protein
570	0.0006783	0.0023141	0.720201	SMU.66	conserved hypothetical protein
571	0.000679	0.0023141	0.744864	SMU.1785	putative phosphatidate cytidylyltransferase synthase)
572	0.0006821	0.0023175	0.684035	SMU.1102	6-phospho-beta-glucosidase
573	0.0006824	0.0023175	0.736697	SMU.423	hypothetical protein
574	0.0006849	0.002322	0.718972	SMU.950	putative GTP-binding protein
575	0.0006879	0.0023281	1.44827	SMU.1937	putative carbon-nitrogen hydrolase
576	0.0006911	0.0023328	0.720554	SMU.525	putative ABC transporter, ATP-binding protein
577	0.0006917	0.0023328	0.74034	SMU.297	DNA polymerase I (POL I)
578	0.0007088	0.0023826	0.656415	SMU.396	putative glycerol uptake facilitator protein
579	0.0007089	0.0023826	0.723202	SMU.339	hypothetical protein
580	0.0007212	0.0024198	0.727439	SMU.1420	putative oxidoreductase
581	0.0007246	0.0024235	0.733472	SMU.817	putative amino acid transporter, amino acid-binding protein
582	0.0007248	0.0024235	1.46475	SMU.1159c	hypothetical protein
583	0.0007301	0.0024335	0.745457	SMU.1724c	putative rRNA methylase
584	0.0007303	0.0024335	1.40317	SMU.1125c	conserved hypothetical protein
585	0.0007328	0.0024377	0.728606	SMU.520	conserved hypothetical protein
586	0.0007356	0.0024428	0.697723	SMU.821	putative DNA primase
587	0.0007386	0.0024471	0.738421	SMU.1323	conserved hypothetical protein; possible hydrolase
588	0.0007394	0.0024471	0.673837	SMU.463	putative thioredoxin reductase (NADPH)
589	0.0007438	0.0024574	1.35144	SMU.311	PTS system, sorbitol (glucitol) phosphotransferase enzyme IIC2
590	0.0007613	0.002511	0.733274	SMU.164	putative tRNA/rRNA methyltransferase
591	0.0007657	0.0025212	0.739232	SMU.39	conserved hypothetical protein
592	0.0007763	0.0025518	0.719111	SMU.320	putative 5-formyltetrahydrofolate cyclo-ligase
593	0.0007841	0.0025694	0.693059	SMU.1107c	conserved hypothetical protein
594	0.0007843	0.0025694	1.36601	SMU.1819	putative glutamyl-tRNA (Gln) amidotransferase subunit B
595	0.0007944	0.0025982	0.73915	SMU.340	50S ribosomal protein L34
596	0.0007984	0.0026069	1.52899	SMU.1116c	hypothetical protein
597	0.0008039	0.0026204	0.641047	SMU.600c	conserved hypothetical protein
598	0.0008225	0.0026766	1.51374	SMU.1344c	putative malonyl-CoA acyl-carrier-protein transacylase
599	0.0008521	0.0027636	0.7533	SMU.417	conserved hypothetical protein
600	0.0008521	0.0027636	1.46137	SMU.309	regulator of sorbitol operon
601	0.0008588	0.0027807	0.762342	SMU.962	putative dehydrogenase
602	0.0008654	0.0027928	0.722981	SMU.1732c	conserved hypothetical protein
603	0.0008654	0.0027928	0.763098	SMU.335	argininosuccinate lyase
604	0.0008895	0.0028658	0.733478	SMU.846	50S ribosomal protein L21
605	0.0008981	0.0028821	0.738116	SMU.900	putative dihydrodipicolinate reductase
606	0.0008983	0.0028821	1.59321	SMU.1713c	conserved hypothetical protein
607	0.000899	0.0028821	0.755773	SMU.124	putative transcriptional regulator (MarR family)
608	0.0009111	0.0029161	0.752908	SMU.1659c	conserved hypothetical protein
609	0.0009402	0.0030043	0.709841	SMU.379	hypothetical protein
610	0.0009558	0.0030492	0.755758	SMU.165	conserved hypothetical protein
611	0.0009772	0.0031123	0.73862	SMU.2029	class III stress response-related ATP-dependent Clp protease, ATP-binding subunit
612	0.0009962	0.0031677	1.38227	SMU.1484c	conserved hypothetical protein

## Sheet: 30h - BRB analysis B
	Parametric p-value	FDR	Geometric mean of ratios	Unique id	Description
			(class 0 5%suc+ 1% st /class 0 5%suc )
1	< 1e-07	< 1e-07	8.49382	SMU.1565	putative 4-alpha-glucanotransferase
2	< 1e-07	< 1e-07	6.13506	SMU.1568	putative maltose/maltodextrin ABC transporter, sugar-binding protein MalX
3	< 1e-07	< 1e-07	7.90763	SMU.1564	putative glycogen phosphorylase
4	< 1e-07	< 1e-07	8.03578	SMU.2047	putative PTS system, glucose-specific IIABC component
5	< 1e-07	< 1e-07	2.8683	SMU.1570	putative maltose/maltodextrin ABC transporter, MalG permease
6	1e-07	1.62e-05	2.87206	SMU.2079c	conserved hypothetical protein
7	1e-07	1.62e-05	6.57919	SMU.2046c	conserved hypothetical protein
8	1e-07	1.62e-05	3.61973	SMU.1566	putative maltose operon transcriptional repressor
9	1e-07	1.62e-05	3.29506	SMU.1571	putative ABC transporter, ATP-binding protein, MsmK-like protein
10	1e-07	1.62e-05	2.71258	SMU.2032	30S ribosomal protein S2
11	1e-07	1.62e-05	2.59444	SMU.2003a	50S ribosomal protein L36
12	1e-07	1.62e-05	2.52623	SMU.169	50S ribosomal protein L13
13	2e-07	2.78e-05	3.89766	SMU.1569	putative maltose/maltodextrin ABC transporter, permease protein MalF
14	2e-07	2.78e-05	0.380903	SMU.1261c	putative phosphoribosyl-ATP pyrophosphohydrolase
15	3e-07	3.89e-05	2.25105	SMU.957	50S ribosomal protein L10
16	4e-07	4.86e-05	2.34026	SMU.2026c	30S ribosomal protein S10
17	5e-07	5.41e-05	2.20922	SMU.1961c	putative PTS system, sugar-specific enzyme IIA component
18	5e-07	5.41e-05	0.474968	SMU.1023	putative pyruvate carboxylase/oxaloacetate decarboxylase, alpha subunit
19	6e-07	5.45e-05	3.10727	SMU.2003	30S ribosomal protein S13
20	6e-07	5.45e-05	2.86624	SMU.2004	putative translation initiation factor IF-1
21	6e-07	5.45e-05	2.27638	SMU.1296	putative glutathione S-transferase
22	7e-07	5.45e-05	0.420556	SMU.141	conserved hypothetical protein
23	7e-07	5.45e-05	0.470358	SMU.952	putative methyltransferase
24	7e-07	5.45e-05	2.757	SMU.2077c	conserved hypothetical protein
25	7e-07	5.45e-05	2.13577	SMU.170	30S ribosomal protein S9
26	8e-07	5.99e-05	2.08686	SMU.2027	putative transcriptional regulator
27	9e-07	6.49e-05	2.24791	SMU.1165c	putative transcription regulator
28	1.1e-06	7.12e-05	2.07982	SMU.2024c	50S ribosomal protein L4
29	1.1e-06	7.12e-05	2.08681	SMU.1203	putative branched-chain amino acid aminotransferase IlvE
30	1.1e-06	7.12e-05	2.65758	SMU.771c	hypothetical protein
31	1.2e-06	7.12e-05	0.47859	SMU.1263	putative phosphoribosyl-ATP pyrophosphatase / phosphoribosyl-AMP cyclohydrolase
32	1.2e-06	7.12e-05	0.492178	SMU.1262c	hypothetical protein
33	1.3e-06	7.12e-05	2.22209	SMU.2005	putative adenylate kinase
34	1.3e-06	7.12e-05	2.12702	SMU.63c	conserved hypothetical protein
35	1.3e-06	7.12e-05	0.497077	SMU.55	hypothetical protein
36	1.5e-06	7.12e-05	2.27303	SMU.602	putative sodium-dependent transporter
37	1.5e-06	7.12e-05	1.95513	SMU.260	conserved hypothetical protein
38	1.5e-06	7.12e-05	2.58324	SMU.2025	50S ribosomal protein L3
39	1.5e-06	7.12e-05	2.24571	SMU.2078c	conserved hypothetical protein
40	1.5e-06	7.12e-05	2.40409	SMU.958	hypothetical protein
41	1.5e-06	7.12e-05	0.502552	SMU.976	putative ABC transporter, periplasmic spermidine/putrescine-binding protein
42	1.7e-06	7.88e-05	2.20524	SMU.330	putative glutamyl-tRNA synthetase
43	1.8e-06	8.15e-05	2.11655	SMU.1787c	putative secreted protein
44	2.3e-06	0.0001017	2.41391	SMU.1743	putative acyl carrier protein
45	2.4e-06	0.0001038	2.00942	SMU.1788c	putative bacterocin transport accessory protein, Bta
46	2.6e-06	0.0001085	0.4503	SMU.140	putative glutathione reductase
47	2.7e-06	0.0001085	0.48112	SMU.815	putative amino acid transporter, amino acid-binding protein
48	2.7e-06	0.0001085	1.87573	SMU.2030	putative transcriptional regulator CtsR
49	2.8e-06	0.0001085	0.535401	SMU.1610	50S ribosomal protein L33
50	2.9e-06	0.0001085	2.23575	SMU.2135c	30S ribosomal protein S4
51	3e-06	0.0001085	2.37967	SMU.669c	putative glutaredoxin
52	3.1e-06	0.0001085	2.04988	SMU.1996	putative isopentenyl monophosphate kinase
53	3.1e-06	0.0001085	1.94432	SMU.1502c	conserved hypothetical protein
54	3.1e-06	0.0001085	1.90926	SMU.707c	putative endolysin
55	3.2e-06	0.0001085	0.416309	SMU.138	putative malate permease
56	3.2e-06	0.0001085	0.53165	SMU.44	conserved hypothetical protein; possible DNA mismatch repair protein
57	3.2e-06	0.0001085	0.500299	SMU.490	putative pyruvate formate-lyase activating enzyme
58	3.3e-06	0.0001085	2.29514	SMU.2000	50S ribosomal protein L17
59	3.3e-06	0.0001085	0.510056	SMU.998	putative ABC transporter, periplasmic ferrichrome-binding protein
60	3.4e-06	0.0001085	2.34349	SMU.80	transcriptional regulator; repressor (HrcA) of class I heat shock genes
61	3.4e-06	0.0001085	2.58585	SMU.2002	30S ribosomal protein S11
62	4e-06	0.0001247	1.81266	SMU.1960c	putative PTS system, mannose-specific IIB component
63	4.1e-06	0.0001247	2.25347	SMU.370	putative ABC transporter, ATP-binding protein
64	4.1e-06	0.0001247	2.12132	SMU.1131c	hypothetical protein
65	4.2e-06	0.0001257	1.81191	SMU.1824c	putative transcriptional regulator
66	5.2e-06	0.0001523	0.505262	SMU.1013c	putative Mg2+/citrate transporter
67	5.4e-06	0.0001523	0.571358	SMU.1264	putative imidazoleglycerol-phosphate synthase, cyclase subunit
68	5.4e-06	0.0001523	0.519451	SMU.1792c	hypothetical protein
69	5.4e-06	0.0001523	0.56421	SMU.1183	PTS system, mannitol-specific enzyme IIA
70	5.6e-06	0.0001546	0.532862	SMU.1933c	conserved hypothetical protein; possible cobalt permease
71	5.7e-06	0.0001546	0.470522	SMU.1356c	putative transposase fragment
72	5.8e-06	0.0001546	0.541759	SMU.1586	putative threonyl-tRNA synthetase
73	5.8e-06	0.0001546	2.07639	SMU.1671c	conserved hypothetical protein
74	5.9e-06	0.0001547	2.29091	SMU.1627	50S ribosomal L11 protein
75	6.1e-06	0.0001547	0.577648	SMU.1182	mannitol-1-phosphate dehydrogenase
76	6.2e-06	0.0001547	0.564035	SMU.1536	putative starch (bacterial glycogen) synthase
77	6.2e-06	0.0001547	0.554306	SMU.1265	putative phosphoribosyl formimino-5-aminoimidazole carboxamide ribonucleotide isomerase
78	6.2e-06	0.0001547	0.530663	SMU.1022	conserved hypothetical protein, CitG homolog
79	6.5e-06	0.0001601	2.50018	SMU.2001	DNA-directed RNA polymerase, alpha subunit
80	6.6e-06	0.0001605	1.99341	SMU.1942c	putative amino acid binding protein
81	6.7e-06	0.000161	1.91033	SMU.1298	50S ribosomal protein L31
82	6.8e-06	0.0001614	0.434625	SMU.1337c	putative alpha/beta superfamily hydrolase
83	6.9e-06	0.0001618	0.562519	SMU.701c	conserved hypothetical protein; putative integral membrane protein
84	7.1e-06	0.0001625	0.580457	SMU.2043c	conserved hypothetical protein
85	7.1e-06	0.0001625	0.549075	SMU.1355c	putative transposase fregment
86	7.4e-06	0.0001655	3.71799	SMU.562	ATP-dependent protease ClpE
87	7.4e-06	0.0001655	1.7374	SMU.2142	putative sugar-phosphate isomerase
88	7.8e-06	0.0001725	0.58395	SMU.1363c	putative transposase
89	8.3e-06	0.0001775	1.92583	SMU.678	putative oxidoreductase, aldo/keto reductase family
90	8.3e-06	0.0001775	2.08091	SMU.409	conserved hypothetical protein
91	8.3e-06	0.0001775	0.481618	SMU.139	conserved hypothetical protein
92	8.7e-06	0.0001822	0.561612	SMU.1710c	conserved hypothetical protein
93	8.8e-06	0.0001822	1.82458	SMU.307	glucose-6-phosphate isomerase
94	8.8e-06	0.0001822	1.82786	SMU.1295	putative adenosine deaminase
95	9e-06	0.0001826	0.522681	SMU.447	conserved hypothetical protein
96	9.1e-06	0.0001826	0.577467	SMU.1354c	putative transposase fragment
97	9.1e-06	0.0001826	1.82302	SMU.1476c	putative GTP-binding protein
98	9.2e-06	0.0001827	0.593976	SMU.1079c	putative ABC transporter, ATP-binding protein
99	9.3e-06	0.0001828	0.575264	SMU.47	hypothetical protein
100	9.6e-06	0.0001868	1.92587	SMU.219	hypothetical protein
101	9.7e-06	0.0001869	0.561822	SMU.1020	putative citrate lyase CilB, citryl-CoA lyase, beta subunit
102	1.01e-05	0.0001927	0.596009	SMU.1078c	putative ABC transporter, ATP-binding protein
103	1.03e-05	0.0001927	1.9972	SMU.1626	50S ribosomal protein L1
104	1.03e-05	0.0001927	0.410497	SMU.1596	putative PTS system, cellobiose-specific IIC component
105	1.08e-05	0.0002002	0.558684	SMU.1574c	conserved hypothetical protein
106	1.14e-05	0.0002033	0.564376	SMU.1937	putative carbon-nitrogen hydrolase
107	1.15e-05	0.0002033	1.92049	SMU.2083c	hypothetical protein
108	1.15e-05	0.0002033	0.598068	SMU.1266	putative glutamine amidotransferase HisH
109	1.15e-05	0.0002033	2.00749	SMU.396	putative glycerol uptake facilitator protein
110	1.15e-05	0.0002033	0.484157	SMU.835	conserved hypothetical protein; possible membrane protein
111	1.16e-05	0.0002033	2.54683	SMU.1997	16S ribosomal RNA
112	1.17e-05	0.0002033	0.531445	SMU.833	putative glycosyltransferase
113	1.23e-05	0.00021	0.515973	SMU.1021	putative citrate lyase, alfa subunit
114	1.23e-05	0.00021	1.77598	SMU.2023c	30S ribosomal protein S19
115	1.25e-05	0.0002115	1.75674	SMU.596	phosphoglyceromutase
116	1.28e-05	0.0002144	0.575254	SMU.700c	putative phosphoglycerate mutase-like protein
117	1.29e-05	0.0002144	1.65234	SMU.1672	putative ATP-dependent Clp protease, proteolytic subunit
118	1.3e-05	0.0002144	1.74831	SMU.960	50S ribosomal protein L7/L12
119	1.32e-05	0.0002159	0.574956	SMU.45	hypothetical protein
120	1.37e-05	0.0002217	0.450485	SMU.977	putative transcriptional antiterminator LicT (fragment)
121	1.38e-05	0.0002217	0.561796	SMU.672	isocitrate dehydrogenase
122	1.39e-05	0.0002217	1.95046	SMU.1294	putative flavodoxin
123	1.41e-05	0.0002231	0.561894	SMU.446	putative glycyl-tRNA synthetase (beta subunit)
124	1.43e-05	0.0002244	0.570273	SMU.365	glutamate synthase (large subunit)
125	1.48e-05	0.0002301	0.571786	SMU.997	putative inorganic ion ABC transporter, ATP-binding protein; possible ferrichrome transport system
126	1.49e-05	0.0002301	2.34775	SMU.42	conserved hypothetical protein
127	1.59e-05	0.0002436	0.556554	SMU.1713c	conserved hypothetical protein
128	1.62e-05	0.0002463	0.60017	SMU.1905c	putative bacteriocin secretion protein
129	1.64e-05	0.0002474	0.600917	SMU.781	putative prephenate dehydrogenase
130	1.66e-05	0.0002485	0.546539	SMU.1711	putative pseudouridylate synthase B, large subunit
131	1.73e-05	0.000257	1.78407	SMU.22	putative secreted antigen GbpB/SagA; putative peptidoglycan hydrolase
132	1.81e-05	0.0002668	0.550312	SMU.1091	hypothetical protein; possible cell wall protein, WapE
133	1.86e-05	0.0002699	1.72127	SMU.1446c	putative ABC transporter, permease protein
134	1.87e-05	0.0002699	0.586663	SMU.653c	putative ABC transporter, permease protein
135	1.88e-05	0.0002699	0.566933	SMU.1267c	hypothetical protein
136	1.89e-05	0.0002699	2.01358	SMU.1317c	hypothetical protein
137	1.9e-05	0.0002699	0.594679	SMU.1361c	putative transcriptional regulator (TetR family)
138	1.94e-05	0.0002716	0.542339	SMU.1541	putative pullulanase
139	1.94e-05	0.0002716	0.564581	SMU.2042	dextranase precursor
140	1.96e-05	0.0002724	1.74613	SMU.510c	hypothetical protein
141	2.04e-05	0.0002815	1.81581	SMU.145	conserved hypothetical protein
142	2.11e-05	0.0002885	0.487436	SMU.2057c	putative cadmium-transporting ATPase; P-type ATPase
143	2.12e-05	0.0002885	0.607528	SMU.1116c	hypothetical protein
144	2.14e-05	0.0002885	0.53931	SMU.1882c	hypothetical protein
145	2.15e-05	0.0002885	1.68713	SMU.648	putative protease maturation protein precursor
146	2.24e-05	0.0002965	1.63316	SMU.1966c	putative periplasmic sugar-binding protein
147	2.24e-05	0.0002965	0.472571	SMU.137	malolactic enzyme
148	2.32e-05	0.0003049	0.579074	SMU.1185	PTS system, mannitol-specific enzyme IIBC component
149	2.34e-05	0.0003049	0.594312	SMU.1482c	conserved hypothetical protein
150	2.35e-05	0.0003049	0.557292	SMU.834	conserved hypothetical protein
151	2.45e-05	0.0003157	1.58076	SMU.188c	putative 33 kD chaperonin (heat shock protein 33) (HSP-33)
152	2.47e-05	0.0003162	0.589672	SMU.909	putative permease
153	2.6e-05	0.0003307	1.61149	SMU.540	peroxide resistance protein Dpr
154	2.63e-05	0.0003323	0.550751	SMU.1730c	putative acetyltransferase
155	2.65e-05	0.0003327	2.10835	SMU.2162c	conserved hypothetical protein
156	2.71e-05	0.0003381	1.89464	SMU.1947	putative transcription antitermination factor
157	2.76e-05	0.0003421	0.501043	SMU.836	hypothetical protein
158	2.8e-05	0.0003449	0.630497	SMU.1392c	putative acetyltransferase
159	2.86e-05	0.00035	0.638949	SMU.1582c	conserved hypothetical protein
160	2.89e-05	0.0003515	1.63006	SMU.504	putative site-specific DNA-methyltransferase
161	2.94e-05	0.0003538	1.64704	SMU.712	putative phosphoenolpyruvate carboxylase
162	2.97e-05	0.0003538	1.77475	SMU.1098c	putative oxidoreductase
163	2.99e-05	0.0003538	1.58619	SMU.417	conserved hypothetical protein
164	2.99e-05	0.0003538	1.65129	SMU.551	cell division protein FtsA
165	3e-05	0.0003538	0.624885	SMU.1834	putative alanine racemase
166	3.04e-05	0.0003541	1.76825	SMU.369c	conserved hypothetical protein
167	3.06e-05	0.0003541	1.75917	SMU.416	tRNA-Ser
168	3.08e-05	0.0003541	1.62257	SMU.471	conserved hypothetical protein
169	3.08e-05	0.0003541	0.635803	SMU.728	putative oxidoreductase
170	3.1e-05	0.0003541	0.612819	SMU.1080c	conserved hypothetical protein; possible transposon-related protein
171	3.13e-05	0.0003541	0.62124	SMU.367	hypothetical protein
172	3.13e-05	0.0003541	0.635689	SMU.527	conserved hypothetical protein
173	3.19e-05	0.0003588	0.569047	SMU.845	conserved hypothetical protein
174	3.29e-05	0.0003658	0.606854	SMU.588	conserved hypothetical protein
175	3.29e-05	0.0003658	0.616756	SMU.1360c	hypothetical protein
176	3.35e-05	0.0003704	0.587711	SMU.779	putative 3-dehydroquinate synthase
177	3.37e-05	0.0003705	1.7343	SMU.231	acetolactate synthase, large subunit (AHAS)
178	3.48e-05	0.0003805	0.544921	SMU.782	conserved hypothetical protein
179	3.52e-05	0.0003827	0.64606	SMU.1271	putative ATP phosphoribosyltransferase
180	3.56e-05	0.0003849	1.80966	SMU.415	conserved hypothetical protein
181	3.61e-05	0.0003881	0.621358	SMU.1535	glycogen phosphorylase
182	3.69e-05	0.0003934	1.64871	SMU.2022	50S ribosomal protein L22
183	3.71e-05	0.0003934	0.567436	SMU.832	hypothetical protein
184	3.72e-05	0.0003934	0.561836	SMU.727	putative transcriptional regulator
185	3.76e-05	0.0003955	0.638776	SMU.1081c	conserved hypothetical protein
186	3.78e-05	0.0003955	1.77543	SMU.1316c	hypothetical protein
187	3.86e-05	0.0004017	1.60404	SMU.1602	putative NAD(P)H-flavin oxidoreductase
188	3.96e-05	0.0004099	1.58612	SMU.1823	putative pyrazinamidase/nicotinamidase
189	4.02e-05	0.0004139	0.612161	SMU.1849	putative deoxycytidylate deaminase
190	4.05e-05	0.0004148	1.63901	SMU.1279c	putative cell division protein (cell shape determining protein)
191	4.1e-05	0.0004177	1.72671	SMU.1247	putative enolase
192	4.3e-05	0.0004321	0.600709	SMU.1270	putative histidinol dehydrogenase
193	4.32e-05	0.0004321	0.530425	SMU.651c	putative ABC transporter, substrate-binding protein
194	4.32e-05	0.0004321	2.38441	SMU.2031	putative translation elongation factor TS
195	4.33e-05	0.0004321	1.77527	SMU.2021	30S ribosomal protein S3
196	4.36e-05	0.0004329	0.648794	SMU.1909c	hypothetical protein
197	4.39e-05	0.0004337	1.63344	SMU.631	conserved hypothetical protein
198	4.51e-05	0.0004433	1.81576	SMU.1467	putative adenine phosphoribosyltransferase
199	4.55e-05	0.0004449	0.537777	SMU.382c	putative oxidoreductase
200	4.63e-05	0.0004505	1.75046	SMU.127	putative acetoin dehydrogenase (TPP-dependent), E1 component alpha subunit
201	4.68e-05	0.0004531	0.652895	SMU.606	hypothetical protein
202	4.72e-05	0.0004547	0.613268	SMU.939	putative dehydrogenase (FMN-dependent family protein)
203	4.75e-05	0.0004553	0.629048	SMU.786	putative prephenate dehydratase
204	4.9e-05	0.0004674	0.642388	SMU.1546	conserved hypothetical protein
205	4.96e-05	0.0004708	0.466649	SMU.1487	conserved hypothetical protein
206	4.99e-05	0.0004714	1.87053	SMU.681	hypothetical protein
207	5.05e-05	0.0004747	2.08452	SMU.1168	putative transcriptional regulator
208	5.24e-05	0.0004902	1.61385	SMU.144c	putative transcriptional regulator
209	5.31e-05	0.0004944	1.59182	SMU.1563	putative cation-transporting P-type ATPase PacL
210	5.4e-05	0.0004972	1.71233	SMU.1477	putative tRNA isopentenylpyrophosphate transferase
211	5.46e-05	0.0004972	1.6174	SMU.632	putative transcriptional regulator
212	5.46e-05	0.0004972	0.635886	SMU.56	conserved hypothetical protein
213	5.48e-05	0.0004972	0.558103	SMU.1522	putative amino acid ABC transporter, integral membrane protein
214	5.49e-05	0.0004972	1.69486	SMU.731	putative ABC transporter, ATP-binding protein
215	5.52e-05	0.0004972	0.582898	SMU.814	putative MutT-like protein
216	5.55e-05	0.0004972	0.528321	SMU.1728	putative transcription elongation factor GreA
217	5.57e-05	0.0004972	2.00218	SMU.218	putative transcriptional regulator
218	5.57e-05	0.0004972	0.637927	SMU.1037c	putative histidine kinase
219	5.63e-05	0.0005003	0.584096	SMU.813	hypothetical protein; putative transcriptional regulator
220	5.7e-05	0.0005042	0.620633	SMU.702c	putative transcriptional regulator
221	5.76e-05	0.0005072	0.663129	SMU.1484c	conserved hypothetical protein
222	5.82e-05	0.0005094	1.52629	SMU.496	putative cysteine synthetase A; O-acetylserine lyase
223	5.87e-05	0.0005094	1.53467	SMU.2102	histidyl-tRNA synthetase (histidine--tRNA ligase)
224	5.87e-05	0.0005094	0.659288	SMU.1276c	putative septation ring formation regulator
225	5.89e-05	0.0005094	1.57092	SMU.321	conserved hypothetical protein; possible membrane protein
226	5.93e-05	0.0005106	1.63906	SMU.1200	tRNA-Tyr
227	6e-05	0.0005136	1.51375	SMU.453	conserved hypoyhetical protein
228	6.03e-05	0.0005136	1.64389	SMU.1930	putative cytoplasmic membrane protein; LemA-like protein
229	6.07e-05	0.0005136	1.55409	SMU.679	putative oxidoreductase, aldo/keto reductase family
230	6.09e-05	0.0005136	0.637046
231	6.12e-05	0.0005136	0.645633	SMU.1916	putative histidine kinase of the competence regulon, ComD
232	6.13e-05	0.0005136	1.57761	SMU.412c	putative Hit-like protein involved in cell-cycle regulation
233	6.15e-05	0.0005136	1.58878	SMU.1826	putative aminotransferase
234	6.32e-05	0.0005256	0.581568	SMU.1875	putative exodeoxyribonuclease V, similar to conjugation transfer protein
235	6.36e-05	0.0005261	1.79497	SMU.1724c	putative rRNA methylase
236	6.38e-05	0.0005261	0.499956	SMU.873	putative homocysteine methyltransferase; methionine synthase II (cobalamin-independent)
237	6.49e-05	0.0005329	1.57408	SMU.1663	putative thymidylate kinase
238	6.54e-05	0.0005347	0.650054	SMU.1537	putative glycogen biosynthesis protein GlgD
239	6.59e-05	0.0005366	0.642204	SMU.1581	DNA polymerase III, gamma/tau subunit
240	6.66e-05	0.00054	1.71122	SMU.913	putative NADP-specific glutamate dehydrogenase
241	6.97e-05	0.0005622	0.662854	SMU.722	hypothetical protein
242	7e-05	0.0005622	0.61424	SMU.222c	hypothetical protein; possible integrase fragment
243	7.02e-05	0.0005622	4.02663	SMU.373	hypothetical protein
244	7.1e-05	0.0005649	2.55429	SMU.677	putative transcriptional regulator (MerR family)
245	7.15e-05	0.0005649	0.672152	SMU.1483c	conserved hypothetical protein
246	7.17e-05	0.0005649	0.611529	SMU.2063	putative ferrochelatase (protoheme ferro-lyase)
247	7.17e-05	0.0005649	0.560802	SMU.186	putative metal-dependent transcriptional regulator
248	7.25e-05	0.0005689	1.86134	SMU.23	phosphoribosyl pyrophosphate synthetase (PRPP synthetase)
249	7.33e-05	0.0005729	0.655143	SMU.356	purine operon repressor
250	7.45e-05	0.0005799	0.602774	SMU.366	NADPH-dependent glutamate synthase (small subunit)
251	7.49e-05	0.0005807	1.69944	SMU.541	conserved hypothetical protein
252	7.7e-05	0.0005946	1.67039	SMU.1670c	conserved hypothetical protein
253	7.78e-05	0.0005984	0.60997	SMU.1172c	conserved hypothetical protein
254	7.86e-05	0.0006022	0.608768	SMU.1206c	hypothetical protein
255	8.03e-05	0.0006128	1.54901	SMU.564	conserved hypothetical protein
256	8.2e-05	0.0006233	1.51006	SMU.627	conserved hypothetical protein
257	8.33e-05	0.0006307	0.669478	SMU.1269	putative phosphoserine phosphatase
258	8.37e-05	0.0006313	0.66138	SMU.906	putative ABC transporter, ATP-binding protein
259	8.5e-05	0.0006386	2.28724	SMU.1780	conserved hypothetical protein
260	8.54e-05	0.000639	0.44136	SMU.652c	putative ABC transporter, ATP-binding protein; possible nitrate transport system
261	8.57e-05	0.000639	1.5554	SMU.475	conserved hypothetical protein
262	8.64e-05	0.0006417	0.654933	SMU.1547c	putative response regulator
263	8.77e-05	0.0006489	1.57689	SMU.1703c	conserved hypothetical protein
264	8.84e-05	0.0006516	1.57653	SMU.06	putative GTP-binding protein
265	9.07e-05	0.000666	1.62764	SMU.295	hypothetical protein
266	9.17e-05	0.0006691	0.646385	SMU.785	putative shikimate kinase
267	9.18e-05	0.0006691	1.55328	SMU.589	putative DNA-binding protein
268	9.27e-05	0.0006731	0.674639	SMU.1432c	putative endoglucanase precursor
269	9.37e-05	0.0006778	0.679056	SMU.1523	putative membrane nuclease EndA
270	9.43e-05	0.0006793	0.658974	SMU.1977c	putative transcriptional regulator
271	9.46e-05	0.0006793	0.665915	SMU.2049c	conserved hypothetical protein
272	9.6e-05	0.0006868	0.606803	SMU.52	conserved hypothetical protein
273	9.75e-05	0.0006939	1.78622	SMU.1992	putative tyrosyl-tRNA synthetase
274	9.77e-05	0.0006939	0.654929	SMU.1085	putative peptide chain release factor 1
275	9.86e-05	0.0006977	0.56588	SMU.1177c	putative ABC transporter, glutamine binding protein
276	9.94e-05	0.0007008	1.50021	SMU.2101	aspartyl-tRNA synthetase
277	0.0001009	0.0007088	0.601945	SMU.1241	putative excinuclease ABC (subunit C)
278	0.000105	0.0007301	0.455016	SMU.1260c	conserved hypothetical protein
279	0.000105	0.0007301	0.646348	SMU.355	putative CMP-binding factor
280	0.0001053	0.0007301	0.656704	SMU.973	putative spermidine/putrescine ABC transporter, ATP-binding protein
281	0.0001056	0.0007301	0.5553	SMU.1538	putative glucose-1-phosphate adenylyltransferase; ADP-glucose pyrophosphorylase
282	0.0001058	0.0007301	1.50381	SMU.24	putative amino acid aminotransferase
283	0.0001066	0.0007318	2.0071	SMU.1781	conserved hypothetical protein
284	0.0001068	0.0007318	0.643314	SMU.1453c	conserved hypothetical protein
285	0.0001085	0.0007408	1.54967	SMU.2164	serine protease HtrA
286	0.0001103	0.000748	0.664516	SMU.1520	putative ABC transporter, glutamine binding protein
287	0.0001106	0.000748	1.51552	SMU.05	conserved hypothetical protein
288	0.0001107	0.000748	0.667651	SMU.1830c	conserved hypothetical protein
289	0.0001114	0.0007501	1.86699	SMU.1070c	conserved hypothetical protein
290	0.0001185	0.0007911	1.72984	SMU.424	negative transcriptional regulator, CopY
291	0.0001186	0.0007911	1.55015	SMU.2104a	50S ribosomal protein L32
292	0.0001187	0.0007911	0.638675	SMU.1213c	putative 5'-nucleotidase precursor
293	0.0001197	0.000795	1.48181	SMU.233	ketol-acid reductoisomerase
294	0.0001235	0.0008175	0.610784	SMU.1017	putative oxaloacetate decarboxylase, sodium ion pump subunit
295	0.0001261	0.0008303	0.674768	SMU.1870	putative DNA mismatch repair protein MutS2
296	0.0001263	0.0008303	0.673124	SMU.641	putative oxidoreductase
297	0.0001285	0.000842	0.685523	SMU.994	putative ribonuclease HII
298	0.0001326	0.0008656	0.648878	SMU.743	conserved hypothetical protein
299	0.000133	0.0008656	1.89666	SMU.758c	conserved hypothetical protein
300	0.0001349	0.0008751	0.568028	SMU.1010	putative citrate lyase ligase
301	0.000136	0.0008793	0.616735	SMU.526c	putative transcriptional regulator
302	0.0001374	0.0008854	0.673389	SMU.905	putative ABC transporter, ATP-binding protein
303	0.0001382	0.0008876	1.46185	SMU.850	conserved hypothetical protein
304	0.0001387	0.0008879	1.72162	SMU.474	putative autoinducer-2 production protein LuxS
305	0.0001394	0.0008894	0.68964	SMU.1153c	hypothetical protein
306	0.0001402	0.0008916	0.613162	SMU.1844	sucrose operon repressor
307	0.0001409	0.0008931	1.46147	SMU.99	fructose-1,6-biphosphate aldolase
308	0.000142	0.0008955	0.596576	SMU.963c	conserved hypothetical protein; putative deacetylase
309	0.0001422	0.0008955	0.621725	SMU.1062	putative ABC transporter, proline/glycine betaine permease protein
310	0.0001448	0.0009073	0.690264	SMU.1451	putative alpha-acetolactate decarboxylase
311	0.000145	0.0009073	1.92897	SMU.2143c	putative tRNA
312	0.0001462	0.0009119	0.602297	SMU.1575c	hypothetical protein
313	0.000149	0.0009264	0.672763	SMU.287	putative ComB, accessory factor for ComA
314	0.0001508	0.0009325	0.659348	SMU.1173	putative O-acetylhomoserine sulfhydrylase
315	0.0001515	0.0009325	0.675296	SMU.1499	putative exonuclease RexA
316	0.0001515	0.0009325	0.616675	SMU.166	hypothetical protein
317	0.0001519	0.0009325	0.655973	SMU.1879	putative PTS system, mannose-specific component IID
318	0.0001531	0.0009369	0.503499	SMU.874	conserved hypothetical protein; putative reductase
319	0.0001538	0.0009382	1.47497	SMU.667	putative ribonucleotide reductase, small subunit
320	0.0001558	0.0009475	0.68943	SMU.487	putative response regulator
321	0.0001575	0.0009548	1.54607	SMU.2094c	conserved hypothetical protein
322	0.0001591	0.0009574	0.665657	SMU.132	putative hippurate amidohydrolase
323	0.0001592	0.0009574	1.68864	SMU.1786	putative undecaprenyl pyrophosphate synthetase
324	0.0001594	0.0009574	0.571028	SMU.61	putative transcriptional regulator
325	0.0001607	0.0009587	0.610721	SMU.1018	hypothetical protein
326	0.0001609	0.0009587	0.686097	SMU.1389	conserved hypothetical protein
327	0.0001611	0.0009587	0.576578	SMU.1908c	hypothetical protein
328	0.0001619	0.0009594	1.6508	SMU.730	conserved hypothetical protein
329	0.0001627	0.0009594	1.63252	SMU.719c	conserved hypothetical protein
330	0.0001627	0.0009594	1.73033	SMU.100	putative sorbose PTS system, IIB component
331	0.0001641	0.0009648	0.665377	SMU.259	putative oligopeptide ABC transporter, ATP-binding protein OppF
332	0.0001653	0.0009689	1.57332	SMU.194c	conserved hypothetical protein; Bacteriophage P2 associated
333	0.0001673	0.0009759	1.57719	SMU.1068c	putative ABC transporter, ATP-binding protein
334	0.0001675	0.0009759	0.602118	SMU.750c	hypothetical protein
335	0.000168	0.0009759	1.50707	SMU.1943	putative leucyl-tRNA synthetase
336	0.0001718	0.000995	0.630964	SMU.1011	putative CitG protein
337	0.0001733	0.0009995	0.597129	SMU.1539	putative 1,4-alpha-glucan branching enzyme
338	0.0001736	0.0009995	0.692989	SMU.1443c	putative tributyrin esterase
339	0.0001762	0.0010078	1.59014	SMU.2155	conserved hypothetical protein
340	0.0001764	0.0010078	1.47171	SMU.205c	hypothetical protein
341	0.0001766	0.0010078	1.48711	SMU.552	putative cell division protein FtsZ
342	0.0001794	0.0010208	0.654667	SMU.1409c	putative transcriptional regulator
343	0.0001804	0.0010235	0.688321	SMU.953c	putative transcriptional regulator/aminotransferase
344	0.0001829	0.0010347	0.668377	SMU.1095	putative choline ABC transporter, osmoprotectant binding protein
345	0.0001861	0.0010497	1.654	SMU.210c	hypothetical protein
346	0.0001894	0.0010652	0.667476	SMU.78	fructan hydrolase; exo-beta-D-fructosidase; fructanase, FruA
347	0.000195	0.0010927	1.48215	SMU.838	glutathione reductase
348	0.0001954	0.0010927	1.5932	SMU.1955	putative co-chaperonin GroES
349	0.0001969	0.0010952	0.652243	SMU.1542c	conserved hypothetical protein
350	0.0001974	0.0010952	0.676978	SMU.1416c	putative mutator protein MutT
351	0.0001979	0.0010952	1.59612	SMU.1534	FoF1 membrane-bound proton-translocating ATPase, c subunit
352	0.0001981	0.0010952	2.10868	SMU.371	conserved hypothetical protein; inner membrane protein
353	0.0001991	0.0010976	0.654765	SMU.951	putative amino acid permease
354	0.0002015	0.0011077	1.54459	SMU.1704	conserved hypothetical protein
355	0.0002035	0.0011155	1.66096	SMU.1508c	putative coenzyme PQQ synthesis protein
356	0.0002067	0.0011299	0.707396	SMU.1218	putative amidase
357	0.0002103	0.0011463	1.45805	SMU.1723c	conserved hypothetical protein
358	0.0002128	0.0011567	0.688193	SMU.1152c	conserved hypothetical protein
359	0.0002155	0.0011654	1.47555	SMU.1876	conserved hypothetical protein
360	0.0002156	0.0011654	1.45468	SMU.1506c	conserved hypothetical protein
361	0.0002242	0.0012086	1.46145	SMU.195c	hypothetical protein; similar to ORF 5 of bacteriophage SPP1
362	0.0002253	0.0012111	1.46214	SMU.734	conserved hypothetical protein; possible membrane protein
363	0.0002283	0.0012227	0.666295	SMU.844	conserved hypothetical protein
364	0.0002287	0.0012227	0.681526	SMU.1253c	hypothetical protein
365	0.0002317	0.0012353	1.56882	SMU.1326	putative peptide chain release factor (RF-2)
366	0.0002347	0.0012479	1.48443	SMU.469	putative recombination protein U
367	0.0002374	0.001253	0.664587	SMU.1055	putative DNA repair protein RadC
368	0.0002376	0.001253	0.709346	SMU.1154c	hypothetical protein
369	0.0002376	0.001253	0.679178	SMU.1833	putative ATP-dependent DNA helicase, RecG
370	0.0002387	0.0012554	0.665897	SMU.1157c	conserved hypothetical protein
371	0.000242	0.0012686	1.54131	SMU.1193	putative transcriptional regulator
372	0.0002425	0.0012686	1.54338	SMU.20	putative cell shape-determining protein MreC
373	0.0002434	0.0012699	1.5921	SMU.81	heat shock protein GrpE (HSP-70 cofactor)
374	0.0002447	0.0012732	1.4772	SMU.1744	putative 3-oxoacyl-[acyl-carrier-protein] synthase III
375	0.0002459	0.0012732	0.671253	SMU.493	formate acetyltransferase (pyruvate formate-lyase 2)
376	0.000246	0.0012732	1.60508	SMU.1315c	putative ATP-binding protein
377	0.0002505	0.001293	1.53673	SMU.133c	putative MDR permease; transmembrane efflux protein
378	0.0002513	0.0012937	1.45918	SMU.21	putative cell shape-determining protein MreD
379	0.0002528	0.001298	0.671575	SMU.1086	putative thymidine kinase
380	0.0002587	0.0013248	0.589853	SMU.1012c	putative transcriptional regulator
381	0.0002601	0.0013285	0.630644	SMU.2038	putative PTS system, trehalose-specific IIABC component
382	0.0002643	0.0013434	0.65769	SMU.1579	hypothetical protein
383	0.000265	0.0013434	1.51754	SMU.232	acetolactate synthase, small subunit
384	0.0002651	0.0013434	0.659558	SMU.864	putative ABC transporter, permease component
385	0.000267	0.0013496	0.56975	SMU.1883	conserved hypothetical protein
386	0.0002683	0.0013526	1.70209	SMU.1701c	conserved hypothetical protein
387	0.0002697	0.0013562	1.4158	SMU.1129	putative response regulator CiaR
388	0.0002746	0.0013737	0.696795	SMU.1934c	putative cobalt ABC transporter, ATP-binding protein
389	0.0002748	0.0013737	0.717812	SMU.1794c	hypothetical protein
390	0.0002753	0.0013737	1.48614	SMU.1367c	conserved hypothetical protein
391	0.0002779	0.0013831	0.705154	SMU.745	putative drug-export protein; multidrug resistance protein
392	0.0002793	0.0013865	0.681915	SMU.1912c	hypothetical protein
393	0.0002845	0.0014087	0.662516	SMU.610	cell surface antigen SpaP
394	0.0002908	0.0014363	1.44676	SMU.1745c	putative transcriptional regulator
395	0.0002928	0.0014425	0.649974	SMU.902	putative ABC transporter, ATP-binding protein
396	0.0002955	0.0014504	0.699112	SMU.1299c	putative acetate kinase
397	0.0002959	0.0014504	0.697096	SMU.587	conserved hypothetical protein
398	0.0002978	0.0014561	0.676743	SMU.897	putative type I restriction-modification system, helicase subunits
399	0.0003003	0.0014607	1.67988	SMU.96	putative DNA-directed RNA polymerase, delta subunit
400	0.0003005	0.0014607	0.64168	SMU.1087	putative 4-oxalocrotonate tautomerase
401	0.000301	0.0014607	1.72458	SMU.2020	50S ribosomal protein L16
402	0.000302	0.0014619	0.711062	SMU.598	putative recombination protein RecM
403	0.0003067	0.0014739	1.47444	SMU.154	30S ribosomal protein S15
404	0.0003069	0.0014739	0.636362	SMU.229	conserved hypothetical protein
405	0.0003074	0.0014739	0.629381	SMU.671	citrate synthase
406	0.0003075	0.0014739	0.701748	SMU.1938c	putative ABC transporter, permease protein
407	0.0003125	0.0014942	1.44634	SMU.197c	hypothetical protein
408	0.0003211	0.0015315	0.705686	SMU.1252	putative glycerate kinase
409	0.0003249	0.0015459	0.613914	SMU.495	glycerol dehydrogenase
410	0.0003299	0.0015658	0.627118	SMU.1134c	putative phosphate ABC transporter, ATP-binding protein
411	0.0003309	0.0015667	1.42296	SMU.247	putative ABC transporter, ATP-binding protein
412	0.0003336	0.0015727	1.47632	SMU.1969c	putative transcriptional regulator
413	0.0003341	0.0015727	1.57106	SMU.372	hypothetical protein
414	0.0003347	0.0015727	0.686393	SMU.607	conserved hypothetical protein
415	0.0003354	0.0015727	1.46387	SMU.91	peptidyl-prolyl isomerase RopA (trigger factor)
416	0.0003379	0.0015769	1.41915	SMU.418	putative transcription factor NusA
417	0.0003379	0.0015769	1.66403	SMU.1694c	putative permease
418	0.0003401	0.001581	0.64815	SMU.605	hypothetical protein
419	0.0003404	0.001581	0.703304	SMU.1204	topoisomerase IV, subunit A
420	0.0003422	0.0015855	0.719075	SMU.1289c	putative permease, chloride channel
421	0.0003447	0.0015933	1.62553	SMU.991	putative ribonucleotide reductase
422	0.0003486	0.0016075	1.47891	SMU.1742c	putative trans-2-enoyl-ACP reductase
423	0.0003503	0.0016115	1.79461	SMU.2076c	hypothetical protein
424	0.0003526	0.0016183	0.682432	SMU.2037	putative trehalose-6-phosphate hydrolase TreA
425	0.0003551	0.0016259	0.637441	SMU.1521	putative amino acid ABC transporter, permease protein
426	0.000357	0.0016308	1.4143	SMU.1027	putative transcription regulator
427	0.0003647	0.0016614	0.604829	SMU.1917	putative response regulator of the competence regulon, ComE; response regulator of sakacin A production
428	0.0003654	0.0016614	0.659517	SMU.33	hypothetical protein
429	0.000368	0.0016693	1.43974	SMU.542	putative glucose kinase
430	0.0003701	0.0016749	0.687099	SMU.673	conserved hypothetical protein
431	0.0003716	0.0016778	1.5509	SMU.1377c	conserved hypothetical protein
432	0.0003749	0.0016888	1.45215	SMU.600c	conserved hypothetical protein
433	0.0003874	0.0017388	0.627271	SMU.1268	putative imidazoleglycerol-phosphate dehydratase
434	0.0003878	0.0017388	1.53136	SMU.940c	putative hemolysin III
435	0.000389	0.0017402	0.662392	SMU.778	putative shikimate 5-dehydrogenase
436	0.0003913	0.0017465	0.715428	SMU.1472	putative single-strand DNA-specific exonuclease RecJ
437	0.0003961	0.0017639	1.40882	SMU.1322	putative acetoin dehydrogenase
438	0.0004032	0.0017877	1.38116	SMU.303	conserved hypothetical protein
439	0.0004033	0.0017877	0.668555	SMU.1256c	hypothetical protein
440	0.0004056	0.0017938	1.45578	SMU.2029	class III stress response-related ATP-dependent Clp protease, ATP-binding subunit
441	0.0004065	0.0017938	0.668254	SMU.1156c	hypothetical protein
442	0.0004076	0.0017945	0.707606	SMU.488	putative hydrolase
443	0.0004164	0.0018292	0.699185	SMU.53	conserved hypothetical protein
444	0.0004186	0.0018347	1.41889	SMU.1498	lactose repressor
445	0.0004218	0.0018445	1.3988	SMU.599	putative D-alanine-D-alanine ligase
446	0.0004245	0.0018522	0.691378	SMU.624	putative 1-acylglycerol-3-phosphate O-acyltransferase
447	0.0004316	0.001879	0.726806	SMU.1904c	hypothetical protein
448	0.0004466	0.0019399	0.698048	SMU.807	putative membrane protein
449	0.0004491	0.0019464	0.659449	SMU.1178c	putative amino acid ABC transporter, ATP-binding protein
450	0.0004514	0.0019521	0.656633	SMU.223c	hypothetical protein
451	0.0004532	0.0019555	1.39601	SMU.410	putative transcriptional regulator
452	0.0004584	0.0019736	1.71859	SMU.2096c	hypothetical protein
453	0.0004618	0.0019838	0.732028	SMU.1137	putative phosphate ABC transporter, permease protein
454	0.0004634	0.0019863	1.63779	SMU.406c	conserved hypothetical protein
455	0.0004658	0.0019922	1.38518	SMU.331	putative transcriptional regulator
456	0.0004874	0.0020743	0.731157	SMU.1229	putative purine nucleoside phosphorylase
457	0.0004882	0.0020743	1.49133	SMU.2158c	putative tryptophanyl-tRNA synthetase
458	0.0004882	0.0020743	0.650025	SMU.185	hypothetical protein
459	0.0004961	0.0021033	0.708936	SMU.1867c	putative alcohol dehydrogenase
460	0.000502	0.0021237	1.6833	SMU.200c	hypothetical protein
461	0.0005039	0.0021254	2.14784	SMU.217c	hypothetical protein
462	0.0005046	0.0021254	0.697997	SMU.486	putative histidine kinase
463	0.0005066	0.0021293	0.718636	SMU.1334	putative phosphopantetheinyl transferase
464	0.0005096	0.0021372	0.733422	SMU.1462c	putative oxidoreductase
465	0.0005163	0.0021607	0.550206	SMU.1019	putative citrate lyase, gamma-subunit
466	0.0005282	0.0022057	0.690939	SMU.529	hypothetical protein
467	0.0005322	0.0022177	0.649623	SMU.1861c	hypothetical protein
468	0.0005343	0.0022217	0.734591	SMU.586	conserved hypothetical protein
469	0.0005378	0.0022315	1.61107	SMU.1171c	conserved hypothetical protein
470	0.0005404	0.0022375	0.716642	SMU.809	excinuclease ABC (subunit B); helicase subunit of the DNA excision repair complex
471	0.0005421	0.0022398	0.709575	SMU.812	hypothetical protein
472	0.0005504	0.0022692	0.714027	SMU.2064c	putative transmembrane protein
473	0.0005557	0.0022774	0.72226	SMU.298	conserved hypothetical protein
474	0.0005559	0.0022774	1.58886	SMU.1069c	hypothetical protein
475	0.0005559	0.0022774	1.35557	SMU.1461	putative glucose-1-phosphate thymidyltransferase
476	0.0005614	0.0022915	0.722917	SMU.1797c	conserved hypothetical protein
477	0.0005617	0.0022915	1.38631	SMU.851	conserved hypothetical protein
478	0.0005639	0.0022957	0.700055	SMU.787	putative transcriptional regulator
479	0.0005691	0.002312	1.41091	SMU.1722c	putative integral membrane protein
480	0.0005736	0.0023255	0.718049	SMU.1920	phosphoglycerate dehydrogenase
481	0.0005786	0.0023409	0.728802	SMU.863	putative ABC transporter, ATP-binding protein
482	0.0005805	0.0023437	1.40486	SMU.611	putative ATP-dependent RNA helicase, DEAD-box family
483	0.0005854	0.0023586	0.726977	SMU.167	hypothetical protein
484	0.0005869	0.0023597	0.675683	SMU.1038c	putative response regulator
485	0.0005881	0.0023597	0.634899	SMU.642	hypothetical protein
486	0.0005975	0.0023907	1.41485	SMU.530c	conserved hypothetical protein
487	0.0005983	0.0023907	0.731671	SMU.32	phosphoribosylpyrophosphate amidotransferase
488	0.0006085	0.0024236	1.4556	SMU.1309c	putative glycerol dehydrogenase
489	0.0006108	0.0024236	0.607397	SMU.893	putative anticodon nuclease
490	0.0006112	0.0024236	0.728803	SMU.1935c	conserved hypothetical protein
491	0.0006115	0.0024236	0.701313	SMU.1139c	conserved hypothetical protein; possible methylase
492	0.000618	0.0024394	0.725889	SMU.901	putative poly(A) polymerase
493	0.000618	0.0024394	0.726475	SMU.1240c	putative nitroreductase
494	0.0006268	0.0024691	0.723062	SMU.1426c	putative phospho-sugar mutase
495	0.0006499	0.0025506	0.734172	SMU.1674	putative aminotransferase; probable beta-cystathionase
496	0.0006501	0.0025506	1.52063	SMU.732	conserved hypothetical protein; possible inner membrane protein
497	0.0006544	0.0025623	1.61063	SMU.246	putative glycosyl transferase N-acetylglucosaminyltransferase), RgpG
498	0.0006602	0.0025798	1.38515	SMU.629	putative manganese-type superoxide dismutase, Fe/Mn-SOD
499	0.0006616	0.0025801	1.35547	SMU.942	putative hydroxymethylglutaryl-CoA reductase
500	0.0006746	0.0026215	0.577216	SMU.744	putative cell division protein FtsY; signal recognition particle (docking protein)
501	0.0006749	0.0026215	0.688119	SMU.839	putative folyl-polyglutamate synthetase
502	0.0006801	0.0026364	1.37547	SMU.880	multiple sugar-binding ABC transporter, permease protein MsmG
503	0.000684	0.0026463	0.733759	SMU.2147c	conserved hypothetical protein
504	0.0006907	0.0026669	0.722784	SMU.573	conserved hypothetical protein
505	0.0006965	0.0026839	0.714657	SMU.1963c	putative sugar-binding periplasmic protein
506	0.0007119	0.0027379	0.735302	SMU.777	putative 3-dehydroquinate dehydratase
507	0.0007161	0.0027486	0.697929	SMU.179	conserved hypothetical protein
508	0.0007499	0.0028726	1.50126	SMU.1043c	putative phosphotransacetylase
509	0.0007531	0.0028792	0.625864	SMU.1184c	putative transcriptional regulator, antiterminator
510	0.0007586	0.0028946	1.41231	SMU.1278c	conserved hypothetical protein
511	0.0007646	0.0029118	0.735012	SMU.1414c	conserved hypothetical protein
512	0.0007665	0.0029133	1.34301	SMU.1702c	putative phosphatase
513	0.0007796	0.0029516	0.677077	SMU.1039c	putative lipopolysaccharide glycosyltransferase
514	0.0007796	0.0029516	1.3973	SMU.2138	putative replicative DNA helicase (DNA polymerase III delta prime subunit)
515	0.0007822	0.0029557	1.67308	SMU.668c	ribonucleotide reductase, large subunit
516	0.0008014	0.0030203	1.63027	SMU.1287	putative transcriptional regulator
517	0.0008024	0.0030203	0.692718	SMU.494	putative transaldolase
518	0.0008077	0.003033	0.71957	SMU.805c	putative amino acid ABC transporter, ATP-binding protein
519	0.0008089	0.003033	1.45334	SMU.202c	hypothetical protein
520	0.0008112	0.0030358	0.648824	SMU.1227	putative purine nucleoside phosphorylase
521	0.000815	0.0030441	1.58376	SMU.2019	50s ribosomal protein L29
522	0.0008277	0.0030856	1.58922	SMU.1656	putative phosphoserine aminotransferase
523	0.0008336	0.0031017	1.36521	SMU.1687	putative manganese-dependent inorganic pyrophosphatase
524	0.0008416	0.0031199	0.644446	SMU.1336	conserved hypothetical protein PksD, involved in polyketide synthesis
525	0.000843	0.0031199	1.41954	SMU.413	putative ABC transporter, ATP-binding protein
526	0.0008433	0.0031199	0.72398	SMU.1734	putative acetyl-CoA carboxylase alpha subunit
527	0.0008508	0.0031379	0.753167	SMU.1084	putative protoporphyrinogen oxidase
528	0.0008514	0.0031379	0.702697	SMU.721	conserved hypothetical protein
529	0.0008596	0.0031622	0.742486	SMU.772	glucan-binding protein D with lipase activity; BglB-like protein
530	0.0008623	0.0031661	0.665915	SMU.1513	putative chromosome segregation ATPase; SMC protein
531	0.0008654	0.0031715	0.712839	SMU.1775c	hypothetical protein
532	0.0008773	0.0032038	0.671474	SMU.1255c	hypothetical protein
533	0.0008775	0.0032038	1.34503	SMU.1692	pyruvate-formate lyase activating enzyme
534	0.0008792	0.003204	1.35294	SMU.187c	conserved hypothetical protein
535	0.000892	0.0032445	0.753376	SMU.1051	putative iron-sulfur cofactor synthesis protein; NifS family
536	0.0008972	0.0032492	1.56567	SMU.1874	putative signal peptidase I
537	0.0008974	0.0032492	0.687836	SMU.58	hypothetical protein
538	0.0008983	0.0032492	0.666834	SMU.974	putative spermidine/putrescine ABC transporter, permease protein
539	0.0009058	0.0032646	0.657236	SMU.1910c	hypothetical protein
540	0.0009059	0.0032646	0.710713	SMU.996	putative ABC transporter, permease protein; possible ferrichrome transport system
541	0.0009081	0.0032665	0.676665	SMU.1853	conserved hypothetical protein
542	0.0009145	0.0032834	1.55934	SMU.1170	putative cytochrome C biogenesis protein
543	0.0009195	0.0032953	0.744944	SMU.1016	putative acetyl-CoA carboxylase, biotin carboxyl carrier subunit
544	0.0009314	0.0033318	1.3686	SMU.2093	putative transcriptional regulator of arginine metabolism
545	0.0009364	0.0033435	0.701717	SMU.1239	putative dipeptidase
546	0.0009405	0.0033463	0.735941	SMU.1291c	putative chorismate mutase
547	0.0009406	0.0033463	0.695022	SMU.184	putative ABC transporter, metal binding lipoprotein; surface adhesin precursor; saliva-binding protein; lipoprotein receptor LraI (LraI family)
548	0.0009453	0.0033569	0.744506	SMU.1180	putative alkylphosphonate uptake protein
549	0.0009572	0.0033893	1.40489	SMU.1669	putative ABC transporter, branched chain amino acid-binding protein
550	0.0009588	0.0033893	1.33335	SMU.1603	putative lactoylglutathione lyase
551	0.0009614	0.0033893	0.497412	SMU.831	conserved hypothetical protein
552	0.0009614	0.0033893	1.3214	SMU.755	putative prolipoprotein diacylglycerol transferase
553	0.0009819	0.0034553	0.752089	SMU.54	putative amino acid recemase
554	0.0009874	0.0034684	0.545354	SMU.1902c	hypothetical protein
555	0.0009928	0.0034811	0.679474	SMU.910	glucosyltransferase-S
556	0.0009975	0.0034909	0.675324	SMU.1588c	putative hexosyltransferase
557	0.0009993	0.0034909	1.32538	SMU.1561	putative potassium uptake system protein TrkB

## Sheet: 30h - BRB analysis C
	Parametric p-value	FDR	Geometric mean of ratios	Unique id	Description
			(class 0 5% suc /class 1% suc )
1	7e-07	0.0013622	18.0659	SMU.1535	glycogen phosphorylase
2	4.9e-06	0.0019979	0.474911	SMU.417	conserved hypothetical protein
3	5.1e-06	0.0019979	1.98301	SMU.446	putative glycyl-tRNA synthetase (beta subunit)
4	7e-06	0.0019979	22.0133	SMU.1861c	hypothetical protein
5	7.8e-06	0.0019979	0.549036	SMU.992	hypothetical protein
6	1.02e-05	0.0019979	0.317277	SMU.2030	putative transcriptional regulator CtsR
7	1.04e-05	0.0019979	0.189153	SMU.2079c	conserved hypothetical protein
8	1.1e-05	0.0019979	0.32754	SMU.1165c	putative transcription regulator
9	1.31e-05	0.0019979	0.387204	SMU.924	thiol peroxidase
10	1.37e-05	0.0019979	13.4295	SMU.1879	putative PTS system, mannose-specific component IID
11	1.38e-05	0.0019979	9.42648	SMU.2127	putative succinate semialdehyde dehydrogenase
12	1.47e-05	0.0019979	9.09119	SMU.179	conserved hypothetical protein
13	1.48e-05	0.0019979	74.1445	SMU.2037	putative trehalose-6-phosphate hydrolase TreA
14	1.54e-05	0.0019979	99.9984	SMU.2038	putative PTS system, trehalose-specific IIABC component
15	1.54e-05	0.0019979	4.36966	SMU.880	multiple sugar-binding ABC transporter, permease protein MsmG
16	1.68e-05	0.0020433	0.231377	SMU.2025	50S ribosomal protein L3
17	1.86e-05	0.0021292	0.375815	SMU.732	conserved hypothetical protein; possible inner membrane protein
18	1.99e-05	0.0021514	0.327973	SMU.1476c	putative GTP-binding protein
19	2.43e-05	0.002356	0.555596	SMU.423	hypothetical protein
20	2.57e-05	0.002356	13.7717	SMU.180	putative oxidoreductase; possible fumarate reductase
21	2.68e-05	0.002356	0.491182	SMU.838	glutathione reductase
22	2.83e-05	0.002356	29.1235	SMU.1539	putative 1,4-alpha-glucan branching enzyme
23	2.84e-05	0.002356	16.5964	SMU.1536	putative starch (bacterial glycogen) synthase
24	3.22e-05	0.002356	0.280943	SMU.2083c	hypothetical protein
25	3.26e-05	0.002356	4.95681	SMU.1077	putative phosphoglucomutase
26	3.35e-05	0.002356	0.274849	SMU.231	acetolactate synthase, large subunit (AHAS)
27	3.39e-05	0.002356	2.52819	SMU.1039c	putative lipopolysaccharide glycosyltransferase
28	3.39e-05	0.002356	0.660718	SMU.1645	putative tellurite resistance protein
29	3.64e-05	0.0024145	20.0516	SMU.1537	putative glycogen biosynthesis protein GlgD
30	3.96e-05	0.0024145	0.199489	SMU.2032	30S ribosomal protein S2
31	4.14e-05	0.0024145	5.4013	SMU.402	pyruvate formate-lyase
32	4.24e-05	0.0024145	0.424697	SMU.247	putative ABC transporter, ATP-binding protein
33	4.37e-05	0.0024145	1.79744	SMU.1454c	putative membrane protein; possible permease
34	4.67e-05	0.0024145	0.384007	SMU.1723c	conserved hypothetical protein
35	5.01e-05	0.0024145	0.46946	SMU.475	conserved hypothetical protein
36	5.11e-05	0.0024145	1.64056	SMU.226c	putative transposase
37	5.27e-05	0.0024145	0.339947	SMU.370	putative ABC transporter, ATP-binding protein
38	5.32e-05	0.0024145	0.322177	SMU.1295	putative adenosine deaminase
39	5.34e-05	0.0024145	0.47779	SMU.2097	hypothetical protein
40	5.56e-05	0.0024145	0.278735	SMU.2135c	30S ribosomal protein S4
41	5.61e-05	0.0024145	16.9824	SMU.105	putative transcriptional regulator; repressor of sugar transport operon
42	5.82e-05	0.0024145	1.36567	SMU.181	putative mevalonate kinase
43	5.92e-05	0.0024145	2.13983	SMU.1252	putative glycerate kinase
44	6.1e-05	0.0024145	0.306172	SMU.957	50S ribosomal protein L10
45	6.16e-05	0.0024145	0.262043	SMU.1203	putative branched-chain amino acid aminotransferase IlvE
46	6.16e-05	0.0024145	4.61883	SMU.881	sucrose phosphorylase, GtfA
47	6.26e-05	0.0024145	0.280209	SMU.260	conserved hypothetical protein
48	6.47e-05	0.0024145	0.522371	SMU.1673	uracil phosphoribosyltransferase
49	6.56e-05	0.0024145	0.21812	SMU.1700c	conserved hypothetical protein; possible LrgB family protein
50	6.56e-05	0.0024145	0.540165	SMU.825	putative RgpAc; glycosyltransferase
51	6.59e-05	0.0024145	1.88699	SMU.1269	putative phosphoserine phosphatase
52	6.6e-05	0.0024145	2.52416	SMU.1022	conserved hypothetical protein, CitG homolog
53	6.69e-05	0.0024145	4.91155	SMU.1564	putative glycogen phosphorylase
54	6.7e-05	0.0024145	2.31196	SMU.700c	putative phosphoglycerate mutase-like protein
55	7.57e-05	0.0026159	0.459408	SMU.400	putative secreted esterase
56	7.73e-05	0.0026159	0.314348	SMU.1296	putative glutathione S-transferase
57	7.74e-05	0.0026159	0.428326	SMU.1966c	putative periplasmic sugar-binding protein
58	8.11e-05	0.0026159	0.427638	SMU.2104a	50S ribosomal protein L32
59	8.14e-05	0.0026159	2.55493	SMU.1768c	hypothetical protein
60	8.18e-05	0.0026159	0.410062	SMU.707c	putative endolysin
61	8.2e-05	0.0026159	2.65488	SMU.1711	putative pseudouridylate synthase B, large subunit
62	8.65e-05	0.002715	0.326157	SMU.170	30S ribosomal protein S9
63	9.01e-05	0.002746	0.232035	SMU.2078c	conserved hypothetical protein
64	9.24e-05	0.002746	2.49147	SMU.1482c	conserved hypothetical protein
65	9.38e-05	0.002746	0.341418	SMU.2158c	putative tryptophanyl-tRNA synthetase
66	9.7e-05	0.002746	0.492387	SMU.372	hypothetical protein
67	9.82e-05	0.002746	0.339299	SMU.127	putative acetoin dehydrogenase (TPP-dependent), E1 component alpha subunit
68	9.94e-05	0.002746	3.62536	SMU.1766c	hypothetical protein
69	0.0001002	0.002746	2.65458	SMU.1710c	conserved hypothetical protein
70	0.0001015	0.002746	2.68389	SMU.1590	intracellular alpha-amylase
71	0.0001015	0.002746	6.57973	SMU.2057c	putative cadmium-transporting ATPase; P-type ATPase
72	0.0001016	0.002746	0.153228	SMU.1701c	conserved hypothetical protein
73	0.0001044	0.0027737	0.285885	SMU.1294	putative flavodoxin
74	0.0001056	0.0027737	1.72279	SMU.259	putative oligopeptide ABC transporter, ATP-binding protein OppF
75	0.0001069	0.0027737	1.70297	SMU.779	putative 3-dehydroquinate synthase
76	0.0001114	0.0028088	1.84879	SMU.953c	putative transcriptional regulator/aminotransferase
77	0.0001138	0.0028088	5.05516	SMU.1185	PTS system, mannitol-specific enzyme IIBC component
78	0.0001148	0.0028088	2.06007	SMU.1217c	putative ABC transporter, amino acid binding protein
79	0.0001161	0.0028088	0.283719	SMU.330	putative glutamyl-tRNA synthetase
80	0.0001194	0.0028088	5.57305	SMU.577	putative histidine kinase LytS
81	0.0001196	0.0028088	0.251888	SMU.1627	50S ribosomal L11 protein
82	0.0001197	0.0028088	3.49787	SMU.494	putative transaldolase
83	0.0001198	0.0028088	0.26917	SMU.2004	putative translation initiation factor IF-1
84	0.0001224	0.0028356	9.17693	SMU.102	putative PTS system, IID component
85	0.0001254	0.0028709	0.398048	SMU.233	ketol-acid reductoisomerase
86	0.0001278	0.002872	0.590022	SMU.1286c	putative permease; multidrug efflux protein
87	0.0001284	0.002872	1.98549	SMU.447	conserved hypothetical protein
88	0.0001312	0.0028775	0.553311	SMU.234	threonine dehydratase
89	0.0001316	0.0028775	0.544887	SMU.697	putative translation initiation factor IF3
90	0.0001443	0.0031201	0.775256	SMU.1802c	conserved hypothetical protein
91	0.0001491	0.0031707	6.78937	SMU.1570	putative maltose/maltodextrin ABC transporter, MalG permease
92	0.0001499	0.0031707	2.16987	SMU.1904c	hypothetical protein
93	0.0001537	0.0032005	4.65368	SMU.1569	putative maltose/maltodextrin ABC transporter, permease protein MalF
94	0.0001546	0.0032005	0.507369	SMU.2029	class III stress response-related ATP-dependent Clp protease, ATP-binding subunit
95	0.000159	0.0032447	37.4093	SMU.1538	putative glucose-1-phosphate adenylyltransferase; ADP-glucose pyrophosphorylase
96	0.0001603	0.0032447	0.138117	SMU.602	putative sodium-dependent transporter
97	0.0001619	0.0032447	0.334855	SMU.596	phosphoglyceromutase
98	0.0001634	0.0032447	0.407053	SMU.2020	50S ribosomal protein L16
99	0.0001666	0.0032748	0.210094	SMU.2143c	putative tRNA
100	0.0001701	0.0033101	0.576179	SMU.2116	putative osmoprotectant amino acid ABC transporter, ATP-binding protein
101	0.0001738	0.0033487	1.91855	SMU.1361c	putative transcriptional regulator (TetR family)
102	0.0001758	0.003354	0.486608	SMU.321	conserved hypothetical protein; possible membrane protein
103	0.0001786	0.0033699	1.19973	SMU.1427c	conserved hypothetical protein
104	0.0001801	0.0033699	5.39634	SMU.148	putative alcohol-acetaldehyde dehydrogenase
105	0.0001884	0.0034316	1.53438	SMU.1562	putative potassium uptake protein TrkA
106	0.0001902	0.0034316	9.14736	SMU.871	putative fructose-1-phosphate kinase
107	0.0001908	0.0034316	1.57319	SMU.1145c	putative histidine kinase; homolog of RumK and ScnK
108	0.0001927	0.0034316	0.290505	SMU.913	putative NADP-specific glutamate dehydrogenase
109	0.0001934	0.0034316	5.51657	SMU.1013c	putative Mg2+/citrate transporter
110	0.000195	0.0034316	0.364376	SMU.678	putative oxidoreductase, aldo/keto reductase family
111	0.0001968	0.0034316	2.08949	SMU.1933c	conserved hypothetical protein; possible cobalt permease
112	0.0001975	0.0034316	1.64189	SMU.1085	putative peptide chain release factor 1
113	0.0002013	0.0034529	0.222295	SMU.1961c	putative PTS system, sugar-specific enzyme IIA component
114	0.0002065	0.0034529	0.41525	SMU.1745c	putative transcriptional regulator
115	0.0002067	0.0034529	0.565446	SMU.144c	putative transcriptional regulator
116	0.0002073	0.0034529	0.463971	SMU.1278c	conserved hypothetical protein
117	0.0002076	0.0034529	1.3248	SMU.1978	putative acetate kinase
118	0.0002143	0.0035076	0.406119	SMU.712	putative phosphoenolpyruvate carboxylase
119	0.0002157	0.0035076	3.97332	SMU.1089	conserved hypothetical protein
120	0.0002174	0.0035076	2.02511	SMU.1264	putative imidazoleglycerol-phosphate synthase, cyclase subunit
121	0.0002193	0.0035076	0.329613	SMU.06	putative GTP-binding protein
122	0.0002199	0.0035076	0.608309	SMU.1625	putative uridylate kinase
123	0.0002234	0.0035106	0.431417	SMU.1200	tRNA-Tyr
124	0.0002237	0.0035106	0.41481	SMU.960	50S ribosomal protein L7/L12
125	0.0002277	0.0035448	0.499995	SMU.303	conserved hypothetical protein
126	0.0002311	0.0035692	3.21388	SMU.1153c	hypothetical protein
127	0.0002346	0.0035947	0.617893	SMU.1396	glucan-binding protein C, GbpC
128	0.0002395	0.0036411	0.339518	SMU.2024c	50S ribosomal protein L4
129	0.0002453	0.0036782	0.429366	SMU.2027	putative transcriptional regulator
130	0.0002476	0.0036782	0.675191	SMU.272	putative PTS system, enzyme IIA component
131	0.0002487	0.0036782	0.388616	SMU.632	putative transcriptional regulator
132	0.0002495	0.0036782	0.489474	SMU.24	putative amino acid aminotransferase
133	0.000261	0.0038074	0.409618	SMU.1602	putative NAD(P)H-flavin oxidoreductase
134	0.0002645	0.0038074	3.08106	SMU.493	formate acetyltransferase (pyruvate formate-lyase 2)
135	0.0002673	0.0038074	3.4071	SMU.1088	putative thiamine biosynthesis lipoprotein
136	0.0002677	0.0038074	0.550775	SMU.381c	conserved hypothetical protein
137	0.0002693	0.0038074	0.519416	SMU.331	putative transcriptional regulator
138	0.00027	0.0038074	0.359817	SMU.1697c	conserved hypothetical protein
139	0.0002763	0.0038682	0.408347	SMU.676	NADP-dependent glyceraldehyde-3-phosphate dehydrogenase
140	0.0002834	0.0039157	2.35711	SMU.356	purine operon repressor
141	0.0002872	0.0039157	0.560283	SMU.1111c	conserved hypothetical protein
142	0.000289	0.0039157	0.604582	SMU.1419	putative transcriptional regulator
143	0.0002895	0.0039157	1.39773	SMU.1940c	putative peptidase, AtmC; ArgE/DapE/Acy1 family protein
144	0.0002928	0.0039157	0.456239	SMU.850	conserved hypothetical protein
145	0.0002955	0.0039157	7.57304	SMU.882	multiple sugar-binding ABC transporter, ATP-binding protein, MsmK
146	0.0002966	0.0039157	1.99373	SMU.976	putative ABC transporter, periplasmic spermidine/putrescine-binding protein
147	0.0002975	0.0039157	0.372358	SMU.1699c	conserved hypothetical protein
148	0.0002978	0.0039157	5.41801	SMU.883	dextran glucosidase DexB
149	0.0003035	0.0039556	3.74966	SMU.1184c	putative transcriptional regulator, antiterminator
150	0.0003049	0.0039556	0.425449	SMU.2023c	30S ribosomal protein S19
151	0.0003087	0.0039637	0.431423	SMU.478	putative guanylate kinase
152	0.0003096	0.0039637	5.07343	SMU.1090	conserved hypothetical protein
153	0.0003133	0.0039781	0.519932	SMU.1823	putative pyrazinamidase/nicotinamidase
154	0.0003162	0.0039781	0.726021	SMU.1102	6-phospho-beta-glucosidase
155	0.0003173	0.0039781	2.04315	SMU.815	putative amino acid transporter, amino acid-binding protein
156	0.0003189	0.0039781	0.503606	SMU.667	putative ribonucleotide reductase, small subunit
157	0.0003212	0.0039812	0.188828	SMU.2077c	conserved hypothetical protein
158	0.0003281	0.0039872	3.90186	SMU.141	conserved hypothetical protein
159	0.0003312	0.0039872	3.19396	SMU.877	alpha-galactosidase
160	0.0003341	0.0039872	0.429049	SMU.551	cell division protein FtsA
161	0.000337	0.0039872	0.494886	SMU.1129	putative response regulator CiaR
162	0.0003376	0.0039872	3.65202	SMU.495	glycerol dehydrogenase
163	0.0003464	0.0039872	0.576851	SMU.26	putative fatty acid/phospholipid synthesis protein
164	0.0003466	0.0039872	2.47548	SMU.1905c	putative bacteriocin secretion protein
165	0.000347	0.0039872	2.0288	SMU.1355c	putative transposase fregment
166	0.0003493	0.0039872	0.352687	SMU.1626	50S ribosomal protein L1
167	0.0003548	0.0039872	0.296602	SMU.1788c	putative bacterocin transport accessory protein, Bta
168	0.0003564	0.0039872	0.424854	SMU.182	putative ABC transporter, ATP-binding protein; possible iron and/or manganese ABC transport system
169	0.0003569	0.0039872	0.492405	SMU.1826	putative aminotransferase
170	0.0003574	0.0039872	3.78277	SMU.1409c	putative transcriptional regulator
171	0.0003579	0.0039872	0.782198	SMU.950	putative GTP-binding protein
172	0.0003581	0.0039872	0.491926	SMU.2015	50S ribosomal protein L5
173	0.0003612	0.0039872	4.51918	SMU.1490	6-phospho-beta-galactosidase
174	0.000364	0.0039872	0.285207	SMU.2003a	50S ribosomal protein L36
175	0.0003645	0.0039872	4.16673	SMU.879	multiple sugar-binding ABC transporter, permease protein MsmF
176	0.0003663	0.0039872	0.571705	SMU.418	putative transcription factor NusA
177	0.0003684	0.0039872	0.23195	SMU.669c	putative glutaredoxin
178	0.0003686	0.0039872	0.45436	SMU.1467	putative adenine phosphoribosyltransferase
179	0.00037	0.0039872	2.51334	SMU.1079c	putative ABC transporter, ATP-binding protein
180	0.0003709	0.0039872	0.252582	SMU.1743	putative acyl carrier protein
181	0.0003714	0.0039872	0.354729	SMU.2005	putative adenylate kinase
182	0.0003754	0.0039872	0.619409	SMU.1624	putative ribosome recycling factor
183	0.0003756	0.0039872	3.49171	SMU.1565	putative 4-alpha-glucanotransferase
184	0.0003778	0.0039872	0.473635	SMU.1326	putative peptide chain release factor (RF-2)
185	0.0003797	0.0039872	6.14793	SMU.1877	putative PTS system, mannose-specific component IIAB
186	0.0003811	0.0039872	2.03241	SMU.1938c	putative ABC transporter, permease protein
187	0.0003856	0.003998	3.05861	SMU.1182	mannitol-1-phosphate dehydrogenase
188	0.000391	0.003998	1.67874	SMU.2128	putative dihydroxy-acid dehydratase
189	0.0003911	0.003998	2.4716	SMU.1037c	putative histidine kinase
190	0.000392	0.003998	8.35455	SMU.100	putative sorbose PTS system, IIB component
191	0.0003924	0.003998	3.26427	SMU.1087	putative 4-oxalocrotonate tautomerase
192	0.0004059	0.0041047	0.286326	SMU.1960c	putative PTS system, mannose-specific IIB component
193	0.0004071	0.0041047	0.393195	SMU.1694c	putative permease
194	0.0004133	0.0041172	1.36499	SMU.906	putative ABC transporter, ATP-binding protein
195	0.0004144	0.0041172	1.5712	SMU.1239	putative dipeptidase
196	0.0004153	0.0041172	0.393116	SMU.734	conserved hypothetical protein; possible membrane protein
197	0.0004168	0.0041172	2.00588	SMU.2036	putative peptidase
198	0.0004212	0.0041397	4.85414	SMU.878	multiple sugar-binding ABC transporter, sugar-binding protein precursor MsmE
199	0.0004325	0.0042294	3.63706	SMU.1568	putative maltose/maltodextrin ABC transporter, sugar-binding protein MalX
200	0.0004493	0.0043717	3.36523	SMU.1335c	putative enoyl-(acyl-carrier-protein) reductase
201	0.0004595	0.0044424	1.39416	SMU.1851	putative excinuclease ABC (subunit A)
202	0.0004628	0.0044424	4.21541	SMU.252	hypothetical protein
203	0.0004637	0.0044424	0.143565	SMU.562	ATP-dependent protease ClpE
204	0.0004657	0.0044424	1.34361	SMU.2043c	conserved hypothetical protein
205	0.0004681	0.0044435	0.641811	SMU.1108c	conserved hypothetical protein
206	0.0004712	0.0044512	0.232817	SMU.730	conserved hypothetical protein
207	0.000475	0.0044655	2.50814	SMU.1402c	conserved hypothetical protein
208	0.0004809	0.0044992	1.51769	SMU.785	putative shikimate kinase
209	0.0004904	0.004549	0.623547	SMU.1112c	conserved hypothetical protein
210	0.0004909	0.004549	0.443913	SMU.2028	levansucrase precursor; beta-D-fructosyltransferase
211	0.0004998	0.0046095	0.776841	SMU.1106c	conserved hypothetical protein; phosphoglycerate mutase-like protein
212	0.0005067	0.0046095	0.360171	SMU.629	putative manganese-type superoxide dismutase, Fe/Mn-SOD
213	0.0005068	0.0046095	0.436897	SMU.399	conserved hypothetical protein
214	0.0005069	0.0046095	0.293823	SMU.1656	putative phosphoserine aminotransferase
215	0.00051	0.0046161	2.14619	SMU.1086	putative thymidine kinase
216	0.0005166	0.0046542	3.1353	SMU.1183	PTS system, mannitol-specific enzyme IIA
217	0.0005228	0.0046883	0.280274	SMU.731	putative ABC transporter, ATP-binding protein
218	0.0005302	0.004721	1.81488	SMU.1076	putative membrane protein
219	0.0005313	0.004721	0.314078	SMU.540	peroxide resistance protein Dpr
220	0.0005444	0.0048155	1.50829	SMU.888	UDP-galactose 4-epimerase, GalE
221	0.0005481	0.0048263	0.344286	SMU.2157	inosine monophosphate dehydrogenase
222	0.0005576	0.0048878	0.249153	SMU.23	phosphoribosyl pyrophosphate synthetase (PRPP synthetase)
223	0.0005613	0.0048982	0.427043	SMU.1367c	conserved hypothetical protein
224	0.0005684	0.004938	0.459232	SMU.1672	putative ATP-dependent Clp protease, proteolytic subunit
225	0.0005754	0.00497	0.503974	SMU.01	chromosomal replication initiator protein, DnaA
226	0.0005772	0.00497	0.440155	SMU.567	putative glutamine ABC transporter, permease component
227	0.0005857	0.0049743	0.358413	SMU.424	negative transcriptional regulator, CopY
228	0.0005891	0.0049743	2.8167	SMU.1154c	hypothetical protein
229	0.000594	0.0049743	1.48367	SMU.60	DNA alkylation repair enzyme
230	0.0005941	0.0049743	0.4432	SMU.1171c	conserved hypothetical protein
231	0.0005946	0.0049743	0.391477	SMU.1317c	hypothetical protein
232	0.0005949	0.0049743	0.55438	SMU.1702c	putative phosphatase
233	0.0005988	0.0049743	2.20688	SMU.1268	putative imidazoleglycerol-phosphate dehydratase
234	0.0006006	0.0049743	4.21151	SMU.870	putative transcriptional regulator of sugar metabolism
235	0.0006007	0.0049743	4.44714	SMU.137	malolactic enzyme
236	0.0006059	0.004991	0.632578	SMU.496	putative cysteine synthetase A; O-acetylserine lyase
237	0.0006096	0.004991	0.727264	SMU.410	putative transcriptional regulator
238	0.0006108	0.004991	0.554947	SMU.479	RNA polymerase-associated protein RpoZ, omega subunit
239	0.000616	0.004991	2.10321	SMU.887	galactose-1-P-uridyl transferase, GalT
240	0.0006171	0.004991	1.60155	SMU.52	conserved hypothetical protein
241	0.0006181	0.004991	0.578581	SMU.1308	putative translation initiation inhibitor; aldR regulator homolog
242	0.0006261	0.0050347	2.70329	SMU.1767c	hypothetical protein
243	0.0006404	0.0051177	1.58938	SMU.1271	putative ATP phosphoribosyltransferase
244	0.0006447	0.0051177	1.7863	SMU.834	conserved hypothetical protein
245	0.0006474	0.0051177	0.377114	SMU.409	conserved hypothetical protein
246	0.0006475	0.0051177	0.546154	SMU.1653	putative D-3-phosphoglycerate dehydrogenase
247	0.0006503	0.0051177	0.366735	SMU.22	putative secreted antigen GbpB/SagA; putative peptidoglycan hydrolase
248	0.0006522	0.0051177	0.545263	SMU.235	conserved hypothetical protein
249	0.0006696	0.005195	0.561541	SMU.99	fructose-1,6-biphosphate aldolase
250	0.0006701	0.005195	2.02416	SMU.88c	conserved hypothetical protein; possible mechanosensitive ion channel
251	0.0006704	0.005195	0.353147	SMU.1996	putative isopentenyl monophosphate kinase
252	0.0006745	0.005195	1.6921	SMU.1007	putative ABC transporter, permease protein
253	0.0006754	0.005195	2.6907	SMU.2049c	conserved hypothetical protein
254	0.0006783	0.0051967	0.40799	SMU.1669	putative ABC transporter, branched chain amino acid-binding protein
255	0.0006854	0.0052305	0.611849	SMU.927	putative response regulator
256	0.0006954	0.0052572	3.26574	SMU.1152c	conserved hypothetical protein
257	0.0006982	0.0052572	2.66081	SMU.1078c	putative ABC transporter, ATP-binding protein
258	0.0007007	0.0052572	0.766993	SMU.483	putative phosphoprotein phosphatase (pppL protein)
259	0.000702	0.0052572	0.572673	SMU.794	hypothetical protein
260	0.0007024	0.0052572	0.41236	SMU.2164	serine protease HtrA
261	0.000708	0.0052572	0.559268	SMU.1097c	putative transcriptional regulator protein
262	0.0007092	0.0052572	5.45763	SMU.138	putative malate permease
263	0.0007105	0.0052572	1.811	SMU.585	DNA repair protein RecN
264	0.0007218	0.0053144	0.516523	SMU.469	putative recombination protein U
265	0.0007237	0.0053144	0.700836	SMU.1120	putative sugar ABC transporter, ATP-binding protein
266	0.0007281	0.0053266	0.277129	SMU.668c	ribonucleotide reductase, large subunit
267	0.0007345	0.0053309	0.635058	SMU.64	Holliday junction DNA helicase RuvB
268	0.0007356	0.0053309	0.613873	SMU.1387	putative oxidoreductase
269	0.0007369	0.0053309	3.52088	SMU.1012c	putative transcriptional regulator
270	0.0007432	0.0053565	1.96021	SMU.1354c	putative transposase fragment
271	0.0007482	0.0053701	2.15594	SMU.1263	putative phosphoribosyl-ATP pyrophosphatase / phosphoribosyl-AMP cyclohydrolase
272	0.0007506	0.0053701	1.87908	SMU.610	cell surface antigen SpaP
273	0.0007561	0.0053799	0.453902	SMU.611	putative ATP-dependent RNA helicase, DEAD-box family
274	0.0007575	0.0053799	0.21332	SMU.1098c	putative oxidoreductase
275	0.0007833	0.0054897	2.04786	SMU.1360c	hypothetical protein
276	0.0007834	0.0054897	2.96147	SMU.2047	putative PTS system, glucose-specific IIABC component
277	0.0007854	0.0054897	0.685071	SMU.2060	putative transcriptional regulator (LysR family)
278	0.0007858	0.0054897	2.32164	SMU.1389	conserved hypothetical protein
279	0.0007901	0.0054897	1.41022	SMU.587	conserved hypothetical protein
280	0.0007912	0.0054897	0.263431	SMU.2026c	30S ribosomal protein S10
281	0.0007927	0.0054897	1.63884	SMU.1253c	hypothetical protein
282	0.0007968	0.0054985	0.395794	SMU.1377c	conserved hypothetical protein
283	0.0008026	0.0055173	0.587066	SMU.599	putative D-alanine-D-alanine ligase
284	0.0008052	0.0055173	1.48033	SMU.487	putative response regulator
285	0.0008124	0.0055471	13.2412	SMU.872	putative PTS system, fructose-specific enzyme IIABC component
286	0.0008269	0.0056075	0.424992	SMU.1663	putative thymidylate kinase
287	0.000827	0.0056075	6.75845	SMU.1878	putative PTS system, mannose-specific component IIC
288	0.0008381	0.005663	2.00515	SMU.1074	putative flavoprotein involved in panthothenate metabolism
289	0.0008466	0.0057006	0.412498	SMU.648	putative protease maturation protein precursor
290	0.0008537	0.0057286	1.31824	SMU.1462c	putative oxidoreductase
291	0.0008623	0.005766	0.510629	SMU.1190	pyruvate kinase
292	0.0008652	0.005766	2.01007	SMU.1081c	conserved hypothetical protein
293	0.0008714	0.0057875	2.35106	SMU.508	conserved hypothetical protein
294	0.0008755	0.005795	1.63629	SMU.1073	putative formyl-tetrahydrofolate synthetase
295	0.0008817	0.0058162	2.1124	SMU.1483c	conserved hypothetical protein
296	0.0008885	0.0058413	0.33657	SMU.564	conserved hypothetical protein
297	0.0008969	0.0058712	2.11021	SMU.886	galactokinase, GalK
298	0.0009018	0.0058712	0.489572	SMU.516	conserved hypothetical protein
299	0.0009021	0.0058712	0.503015	SMU.725c	conserved hypothetical protein
300	0.0009065	0.0058791	0.354606	SMU.296	conserved hypothetical protein
301	0.0009123	0.0058791	4.02764	SMU.1574c	conserved hypothetical protein
302	0.0009133	0.0058791	3.40295	SMU.1770	putative valyl-tRNA synthetase
303	0.0009154	0.0058791	0.382043	SMU.07	putative peptidyl-tRNA hydrolase
304	0.0009241	0.0058901	5.02272	SMU.1091	hypothetical protein; possible cell wall protein, WapE
305	0.0009248	0.0058901	1.45899	SMU.859	putative carbamoyl phosphate synthetase, small subunit
306	0.0009262	0.0058901	3.10106	SMU.1342	putative bacitracin synthetase 1; BacA
307	0.0009376	0.0059432	0.355076	SMU.232	acetolactate synthase, small subunit
308	0.0009458	0.0059757	0.450533	SMU.1876	conserved hypothetical protein
309	0.0009515	0.0059923	3.47616	SMU.1728	putative transcription elongation factor GreA
310	0.0009547	0.0059931	1.12789	SMU.287	putative ComB, accessory factor for ComA
311	0.0009642	0.0060295	2.55922	SMU.1011	putative CitG protein
312	0.0009668	0.0060295	0.286558	SMU.2142	putative sugar-phosphate isomerase
313	0.0009732	0.0060295	0.791961	SMU.1727	putative inner membrane protein
314	0.0009739	0.0060295	8.30095	SMU.874	conserved hypothetical protein; putative reductase
315	0.000976	0.0060295	3.70142	SMU.43	putative site-specific DNA-methyltransferase restriction-modification protein
316	0.000987	0.0060782	3.26342	SMU.1883	conserved hypothetical protein
317	0.0009924	0.0060785	0.425183	SMU.1649	putative exodeoxyribonuclease III
318	0.0009933	0.0060785	2.31562	SMU.1147c	hypothetical protein
319	0.0009999	0.0060997	0.435214	SMU.1744	putative 3-oxoacyl-[acyl-carrier-protein] synthase III

## Sheet: 34h - BRB analysis A
	Parametric p-value	FDR	Geometric mean of ratios	Unique id	Description
			(class 0 5%suc + 1%st /class 1%suc )
1	< 1e-07	< 1e-07	40.7905	SMU.2038	putative PTS system, trehalose-specific IIABC component
2	< 1e-07	< 1e-07	6.28041	SMU.1539	putative 1,4-alpha-glucan branching enzyme
3	< 1e-07	< 1e-07	8.25006	SMU.104	putative alpha-glucosidase; glycosyl hydrolase
4	2e-07	7.78e-05	3.91358	SMU.1570	putative maltose/maltodextrin ABC transporter, MalG permease
5	2e-07	7.78e-05	7.84744	SMU.100	putative sorbose PTS system, IIB component
6	3e-07	9.73e-05	26.9734	SMU.2037	putative trehalose-6-phosphate hydrolase TreA
7	5e-07	0.0001297	3.5524	SMU.1536	putative starch (bacterial glycogen) synthase
8	6e-07	0.0001297	3.77849	SMU.871	putative fructose-1-phosphate kinase
9	6e-07	0.0001297	4.8661	SMU.179	conserved hypothetical protein
10	7e-07	0.0001362	3.36029	SMU.1564	putative glycogen phosphorylase
11	8e-07	0.0001415	4.8905	SMU.872	putative PTS system, fructose-specific enzyme IIABC component
12	1.1e-06	0.0001647	26.873	SMU.1423	putative pyruvate dehydrogenase, TPP-dependent E1 component alpha-subunit
13	1.1e-06	0.0001647	4.3814	SMU.105	putative transcriptional regulator; repressor of sugar transport operon
14	1.5e-06	0.0002085	4.06829	SMU.2127	putative succinate semialdehyde dehydrogenase
15	1.8e-06	0.0002335	3.18497	SMU.1877	putative PTS system, mannose-specific component IIAB
16	2e-06	0.0002432	3.43812	SMU.148	putative alcohol-acetaldehyde dehydrogenase
17	3e-06	0.0003434	3.2386	SMU.1535	glycogen phosphorylase
18	5.8e-06	0.000627	3.60697	SMU.576	putative response regulator LytR
19	6.3e-06	0.0006453	2.90993	SMU.1077	putative phosphoglucomutase
20	6.8e-06	0.0006616	3.08208	SMU.1878	putative PTS system, mannose-specific component IIC
21	1.23e-05	0.0011398	3.81152	SMU.1565	putative 4-alpha-glucanotransferase
22	2.21e-05	0.0019055	3.66897	SMU.1537	putative glycogen biosynthesis protein GlgD
23	2.29e-05	0.0019055	0.377363	SMU.940c	putative hemolysin III
24	2.35e-05	0.0019055	4.07679	SMU.1538	putative glucose-1-phosphate adenylyltransferase; ADP-glucose pyrophosphorylase
25	2.81e-05	0.0021873	3.95466	SMU.180	putative oxidoreductase; possible fumarate reductase
26	3.11e-05	0.0023277	2.32227	SMU.870	putative transcriptional regulator of sugar metabolism
27	3.9e-05	0.0028109	2.19177	SMU.881	sucrose phosphorylase, GtfA
28	4.11e-05	0.0028248	3.21554	SMU.1568	putative maltose/maltodextrin ABC transporter, sugar-binding protein MalX
29	4.34e-05	0.0028248	3.17294	SMU.402	pyruvate formate-lyase
30	4.44e-05	0.0028248	2.42181	SMU.1491	PTS system, lactose-specific enzyme IIBC EIIBC-LAC)
31	4.5e-05	0.0028248	3.79971	SMU.1571	putative ABC transporter, ATP-binding protein, MsmK-like protein
32	5.41e-05	0.0032728	3.09485	SMU.1841	putative PTS system, sucrose-specific IIABC component
33	5.55e-05	0.0032728	2.94434	SMU.2047	putative PTS system, glucose-specific IIABC component
34	6.16e-05	0.0035257	2.30265	SMU.1879	putative PTS system, mannose-specific component IID
35	7.18e-05	0.0039921	2.00183	SMU.880	multiple sugar-binding ABC transporter, permease protein MsmG
36	9.32e-05	0.005038	1.94625	SMU.1089	conserved hypothetical protein
37	0.0001079	0.005675	2.0003	SMU.877	alpha-galactosidase
38	0.0001138	0.0058278	0.450497	SMU.1442c	conserved hypothetical protein
39	0.0001472	0.0072343	2.88042	SMU.149	putative transposase
40	0.0001487	0.0072343	4.2857	SMU.1596	putative PTS system, cellobiose-specific IIC component
41	0.0001872	0.0088852	1.88308	SMU.1090	conserved hypothetical protein
42	0.0002396	0.0111015	2.53224	SMU.252	hypothetical protein
43	0.0002668	0.0120743	1.85804	SMU.1182	mannitol-1-phosphate dehydrogenase
44	0.0002805	0.0124058	1.93883	SMU.1088	putative thiamine biosynthesis lipoprotein
45	0.0004035	0.0174491	1.84846	SMU.879	multiple sugar-binding ABC transporter, permease protein MsmF
46	0.0004158	0.0175901	2.77539	SMU.1569	putative maltose/maltodextrin ABC transporter, permease protein MalF
47	0.0004382	0.0181433	2.89202	SMU.980	putative PTS system, beta-glucoside-specific EII component
48	0.0004881	0.0197884	1.97038	SMU.1495	galactose-6-phosphate isomerase, subunit LacB
49	0.0006478	0.0257269	0.557546	SMU.1502c	conserved hypothetical protein
50	0.0006662	0.0259285	1.85146	SMU.675	phosphoenolpyruvate:sugar phosphotransferase system enzyme I, PTS system EI component
51	0.0006937	0.0264694	2.36241	SMU.1493	tagatose-1,6-bisphosphate aldolase
52	0.0007094	0.0265479	0.483834	SMU.1294	putative flavodoxin
53	0.0007552	0.0276044	0.521747	SMU.756	conserved hypothetical protein
54	0.000766	0.0276044	0.479169	SMU.1895c	hypothetical protein
55	0.0009235	0.0326751	1.8983	SMU.1409c	putative transcriptional regulator

[truncated: 2 more sheets: 34h - BRB analysis B, 34h - BRB analysis C]
